# Supplementary material for: Metabolic Profile and Long-Term Risk of Depression, Anxiety, and Stress-Related Disorders
Source: PubMed Central journal article supplement (PMC10988352; doi:10.1001/jamanetworkopen.2024.4525), 2024-04-02

## Supplementary Online Content

Chourpiliadis C, Zeng Y, Lovik A, et al. Metabolic profile and long-term risk of depression, anxiety, and stress-related disorders. *JAMA Netw Open*. 2024;7(4):e244525.

doi:10.1001/jamanetworkopen.2024.4525

**eTable 1.** ICD Codes Used for Outcome Ascertainment

**eTable 2.** Descriptive Statistics of Matching Variables Between Cases and Controls

**eTable 3.** Incidence Rates (IR) per 10 000 Person-Years and Adjusted Hazard Ratios (aHRs) With 95% Confidence Intervals (CI) of Depression, Anxiety, or Stress-Related Disorders in Relation to High Versus Low Levels Of Carbohydrate, Lipid, and Apolipoprotein Biomarkers, Analysis Stratified by Sex

**eTable 4.** Incidence Rates (IR) per 10 000 Person-Years and Adjusted Hazard Ratios (aHRs) With 95% Confidence Intervals (CI) of Depression, Anxiety, or Stress-Related Disorders in Relation to High Versus Low Levels of Carbohydrate, Lipid, and Apolipoprotein Biomarkers Among the 161 237 Definitely Employed Individuals– A Study Based on AMORIS Cohort

**eTable 5.** Incidence Rates (IR) per 10 000 Person-Years and Adjusted Hazard Ratios (aHRs) With 95% Confidence Intervals (CI) of Depression, Anxiety, or Stress-Related Disorders for One Standard Deviation Increase in the Levels of Carbohydrate, Lipid, and Apolipoprotein Biomarkers Among the 161 237 Definitely Employed Individuals – A Study Based on AMORIS Cohort

**eTable 6.** Incidence Rates (IR) per 10 000 Person-Years and Adjusted Hazard Ratios (aHRs) With 95% Confidence Intervals (CI) of Depression, Anxiety, or Stress-Related Disorders in Relation to High Versus Low Levels of Carbohydrate, Lipid, and Apolipoprotein Biomarkers Among Individuals With Biomarker Measured Through Referral by Outpatient Care – A Study Based on AMORIS Cohort

**eTable 7.** Number (%) of Participants With Diagnosis of Depression, Anxiety and Stress-Related Disorders Among Individuals With Low, High or Missing Socioeconomic Status

**eTable 8.** Incidence Rates (IR) per 10 000 Person-Years and Adjusted Hazard Ratios (aHRs) With 95% Confidence Intervals (CI) of Depression, Anxiety, or Stress-Related Disorders in Relation to High Versus Low Levels of Carbohydrate, Lipid, and Apolipoprotein Biomarkers, Excluding From the Analysis Individuals Missing Socioeconomic Status – A Study Based on AMORIS Cohort

**eTable 9.** Observed and Predicted Biomarker Levels Among Cases and Controls During up to 30 Years Before Diagnosis of the Cases and Their Matched Controls

**eFigure 1.** Flowchart of the Study Design

**eFigure 2.** Mean Concentrations of Blood Biomarkers of Lipid, Carbohydrate, and Apolipoprotein Metabolism During the 30 Years Before the Diagnosis of Depression, Anxiety, or Stress-Related Disorders, Comparing Patients With Such Disorders (Green Area) to the Matched Controls (Pink Area)

This supplementary material has been provided by the authors to give readers additional information about their work.

eTable 1. ICD codes used for outcome ascertainment

| Diagnoses                | ICD-8 (1968-1986)          | ICD-9 (1987-1996)            | ICD-10 (1997-) |
|--------------------------|----------------------------|------------------------------|----------------|
| Depression               | 296,0, 296,2, 298,0, 300,4 | 296B, 296D, 298A, 300E, 311X | F32-F33        |
| Anxiety                  | 300,0, 300,2               | 300A, 300C                   | F40-F41        |
| Stress-related disorders | 307                        | 308X, 309A, 309B, 309X       | F43            |

| eTable 2. Descriptive statistics of matching variables between cases and controls |       |                                                  |                  |                 |                  |                 |                  |                          |                  |
|-----------------------------------------------------------------------------------|-------|--------------------------------------------------|------------------|-----------------|------------------|-----------------|------------------|--------------------------|------------------|
| Matching variables                                                                |       | Depression, anxiety, or stress-related disorders |                  | Depression      |                  | Anxiety         |                  | Stress-related disorders |                  |
|                                                                                   |       | Cases                                            | Controls         | Cases           | Controls         | Cases           | Controls         | Cases                    | Controls         |
| N                                                                                 |       | 16 256                                           | 162 233          | 9 725           | 97 229           | 7 582           | 75 799           | 4 833                    | 48 307           |
| Female, N (%)                                                                     |       | 8 693<br>(53.5)                                  | 86 706<br>(53.5) | 4 972<br>(51.1) | 49 708<br>(51.1) | 4 248<br>(56.0) | 42 459<br>(56.0) | 2 776<br>(57.4)          | 27 737<br>(57.4) |
| Age at first blood sampling in years, mean±SD                                     |       | 40.3±<br>12.9                                    | 40.3±<br>12.8    | 41.5±<br>13.0   | 41.3±<br>12.9    | 39.5±<br>12.8   | 39.6±<br>12.6    | 34.1±<br>10.5            | 34.3±<br>10.4    |
| Calendar year of first blood sampling, N (%)                                      | >1990 | 6 639<br>(42.0)                                  | 65 940<br>(41.6) | 3 802<br>(39.1) | 37 853<br>(38.9) | 3 183<br>(42.0) | 31 719<br>(41.8) | 2 205<br>(45.6)          | 22 260<br>(46.1) |
|                                                                                   | ≤1990 | 9 617<br>(58.0)                                  | 96 293<br>(58.4) | 5 923<br>(60.9) | 59 376<br>(61.1) | 4 399<br>(58.0) | 44 080<br>(58.2) | 2 628<br>(54.3)          | 26 047<br>(53.9) |

eTable 3. Incidence rates (IR) per 10 000 person-years and adjusted hazard ratios (aHR) with 95% confidence intervals (CI) of depression, anxiety, or stress-related disorders in relation to high versus low levels of carbohydrate, lipid, and apolipoprotein biomarkers, analysis stratified by sex

| Biomarkers <sup>a,b</sup>                                           | Depression, anxiety, or stress-related disorders |                         | Depression              |                         | Anxiety                 |                         | Stress-related disorders |                         |
|---------------------------------------------------------------------|--------------------------------------------------|-------------------------|-------------------------|-------------------------|-------------------------|-------------------------|--------------------------|-------------------------|
|                                                                     | Males<br>aHR (95% CI)                            | Females<br>aHR (95% CI) | Males<br>aHR (95% CI)   | Females<br>aHR (95% CI) | Males<br>aHR (95% CI)   | Females<br>aHR (95% CI) | Males<br>aHR (95% CI)    | Females<br>aHR (95% CI) |
| <b>High glucose (≥6.11 mmol/L)</b>                                  |                                                  |                         |                         |                         |                         |                         |                          |                         |
| Yes                                                                 | <b>1.31 (1.18-1.46)</b>                          | <b>1.26 (1.10-1.43)</b> | <b>1.40 (1.23-1.58)</b> | <b>1.27 (1.08-1.50)</b> | 1.15 (0.97-1.36)        | <b>1.32 (1.10-1.58)</b> | 1.22 (0.97-1.53)         | 1.23 (0.93-1.62)        |
| No                                                                  | Ref.                                             | Ref.                    | Ref.                    | Ref.                    | Ref.                    | Ref.                    | Ref.                     | Ref.                    |
| <b>High total cholesterol (≥5.00 mmol/L)</b>                        |                                                  |                         |                         |                         |                         |                         |                          |                         |
| Yes                                                                 | 1.03 (0.97-1.08)                                 | 1.00 (0.95-1.05)        | 1.02 (0.95-1.10)        | 0.99 (0.92-1.06)        | 1.03 (0.95-1.12)        | 1.05 (0.97-1.13)        | 1.02 (0.92-1.13)         | 0.98 (0.90-1.06)        |
| No                                                                  | Ref.                                             | Ref.                    | Ref.                    | Ref.                    | Ref.                    | Ref.                    | Ref.                     | Ref.                    |
| <b>High triglycerides (≥1.71 mmol/L)</b>                            |                                                  |                         |                         |                         |                         |                         |                          |                         |
| Yes                                                                 | <b>1.12 (1.06-1.19)</b>                          | <b>1.21 (1.12-1.31)</b> | <b>1.18 (1.10-1.26)</b> | <b>1.20 (1.09-1.33)</b> | <b>1.13 (1.03-1.23)</b> | <b>1.24 (1.11-1.38)</b> | <b>1.18 (1.05-1.31)</b>  | <b>1.28 (1.11-1.49)</b> |
| No                                                                  | Ref.                                             | Ref.                    | Ref.                    | Ref.                    | Ref.                    | Ref.                    | Ref.                     | Ref.                    |
| <b>High LDL-C (≥3.00 mmol/L)</b>                                    |                                                  |                         |                         |                         |                         |                         |                          |                         |
| Yes                                                                 | 0.99 (0.91-1.08)                                 | 1.00 (0.93-1.08)        | 0.96 (0.86-1.07)        | 0.97 (0.87-1.07)        | <b>0.86 (0.76-0.98)</b> | 1.05 (0.94-1.17)        | 0.95 (0.81-1.12)         | 0.98 (0.86-1.12)        |
| No                                                                  | Ref.                                             | Ref.                    | Ref.                    | Ref.                    | Ref.                    | Ref.                    | Ref.                     | Ref.                    |
| <b>High HDL-C (≥1.03 mmol/L)</b>                                    |                                                  |                         |                         |                         |                         |                         |                          |                         |
| Yes                                                                 | <b>0.88 (0.79-0.99)</b>                          | 0.85 (0.69-1.05)        | 0.89 (0.77-1.02)        | 0.92 (0.69-1.23)        | <b>0.79 (0.67-0.93)</b> | <b>0.75 (0.57-0.98)</b> | 0.90 (0.72-1.13)         | 0.78 (0.54-1.12)        |
| No                                                                  | Ref.                                             | Ref.                    | Ref.                    | Ref.                    | Ref.                    | Ref.                    | Ref.                     | Ref.                    |
| <b>High LDL-C/HDL-C (≥3.50)</b>                                     |                                                  |                         |                         |                         |                         |                         |                          |                         |
| Yes                                                                 | 0.99 (0.90-1.10)                                 | <b>1.18 (1.02-1.37)</b> | 0.98 (0.86-1.12)        | 1.15 (0.95-1.39)        | 1.06 (0.91-1.23)        | 1.15 (0.93-1.42)        | 0.80 (0.64-1.02)         | 1.30 (0.96-1.75)        |
| No                                                                  | Ref.                                             | Ref.                    | Ref.                    | Ref.                    | Ref.                    | Ref.                    | Ref.                     | Ref.                    |
| <b>High ApoA-I (≥1.00 mmol/L in male and 1.10 mmol/L in female)</b> |                                                  |                         |                         |                         |                         |                         |                          |                         |
| Yes                                                                 | 1.09 (0.84-1.43)                                 | 0.80 (0.63-1.01)        | 0.90 (0.66-1.23)        | 0.78 (0.57-1.06)        | 1.30 (0.84-2.00)        | 0.90 (0.64-1.27)        | 1.25 (0.73-2.12)         | 0.70 (0.49-1.01)        |
| No                                                                  | Ref.                                             | Ref.                    | Ref.                    | Ref.                    | Ref.                    | Ref.                    | Ref.                     | Ref.                    |
| <b>High ApoB (≥0.90 mmol/L)</b>                                     |                                                  |                         |                         |                         |                         |                         |                          |                         |
| Yes                                                                 | 0.90 (0.80-1.02)                                 | 1.00 (0.91-1.10)        | 0.93 (0.79-1.09)        | 0.96 (0.84-1.10)        | 0.94 (0.78-1.13)        | 1.09 (0.95-1.25)        | 0.91 (0.73-1.13)         | 0.87 (0.74-1.02)        |
| No                                                                  | Ref.                                             | Ref.                    | Ref.                    | Ref.                    | Ref.                    | Ref.                    | Ref.                     | Ref.                    |
| <b>High ApoB/ApoA-I (≥0.90 in male and 0.80 in female)</b>          |                                                  |                         |                         |                         |                         |                         |                          |                         |
| Yes                                                                 | 1.00 (0.90-1.10)                                 | 1.10 (1.00-1.22)        | 0.98 (0.86-1.10)        | 1.10 (0.96-1.26)        | 1.06 (0.92-1.23)        | 1.13 (0.98-1.29)        | 0.97 (0.80-1.17)         | 1.03 (0.85-1.25)        |
| No                                                                  | Ref.                                             | Ref.                    | Ref.                    | Ref.                    | Ref.                    | Ref.                    | Ref.                     | Ref.                    |

Abbreviations: ApoA-I: apolipoprotein A-I; ApoB: apolipoprotein B; HDL-C: high-density lipoprotein cholesterol; LDL-C: low-density lipoprotein cholesterol; Ref.: Reference

<sup>a</sup>Adjusted for age at first blood sampling, sex, fasting status, country of birth, and socioeconomic status

<sup>b</sup>Statistically significant estimates are highlighted with bold

eTable 4. Incidence rates (IR) per 10 000 person-years and adjusted hazard ratios (aHR) with 95% confidence intervals (CI) of depression, anxiety, or stress-related disorders in relation to high versus low levels of carbohydrate, lipid, and apolipoprotein biomarkers among the 161 237 definitely employed individuals—a study based on AMORIS Cohort

| Biomarkers <sup>a,b</sup>                                           | Depression, anxiety, or stress-related disorders |                         | Depression         |                         | Anxiety            |                         | Stress-related disorders |                         |
|---------------------------------------------------------------------|--------------------------------------------------|-------------------------|--------------------|-------------------------|--------------------|-------------------------|--------------------------|-------------------------|
|                                                                     | No. of events (IR)                               | aHR (95% CI)            | No. of events (IR) | aHR (95% CI)            | No. of events (IR) | aHR (95% CI)            | No. of events (IR)       | aHR (95% CI)            |
| <b>High glucose (≥6.11 mmol/L)</b>                                  |                                                  |                         |                    |                         |                    |                         |                          |                         |
| Yes                                                                 | 464 (37.5)                                       | <b>1.24 (1.13-1.36)</b> | 310 (24.8)         | <b>1.3 (1.16-1.46)</b>  | 189 (15.0)         | 1.11 (0.96-1.29)        | 102 (8.0)                | 1.19 (0.98-1.46)        |
| No                                                                  | 11 357 (34.7)                                    | Ref.                    | 6 701 (20.2)       | Ref.                    | 5 349 (16.1)       | Ref.                    | 3 522 (10.5)             | Ref.                    |
| <b>High total cholesterol (≥5.00 mmol/L)</b>                        |                                                  |                         |                    |                         |                    |                         |                          |                         |
| Yes                                                                 | 7 217 (33.5)                                     | 1.01 (0.97-1.06)        | 4 423 (20.3)       | 1.01 (0.96-1.07)        | 3 340 (15.2)       | 1.03 (0.97-1.10)        | 1 853 (8.4)              | 0.99 (0.92-1.06)        |
| No                                                                  | 4 604 (37.2)                                     | Ref.                    | 2 588 (20.6)       | Ref.                    | 2 198 (17.4)       | Ref.                    | 1 771 (14.0)             | Ref.                    |
| <b>High triglycerides (≥1.71 mmol/L)</b>                            |                                                  |                         |                    |                         |                    |                         |                          |                         |
| Yes                                                                 | 1 982 (34.6)                                     | <b>1.16 (1.10-1.22)</b> | 1 267 (21.9)       | <b>1.19 (1.12-1.27)</b> | 893 (15.3)         | <b>1.15 (1.07-1.24)</b> | 522 (8.9)                | <b>1.2 (1.09-1.32)</b>  |
| No                                                                  | 9 839 (34.9)                                     | Ref.                    | 5 744 (20.1)       | Ref.                    | 4 645 (16.2)       | Ref.                    | 3 102 (10.8)             | Ref.                    |
| <b>High LDL-C (≥3.00 mmol/L)</b>                                    |                                                  |                         |                    |                         |                    |                         |                          |                         |
| Yes                                                                 | 2 425 (31.7)                                     | 0.97 (0.91-1.04)        | 1 461 (18.9)       | 0.95 (0.87-1.04)        | 1 126 (14.5)       | 0.96 (0.87-1.06)        | 620 (7.9)                | 0.94 (0.83-1.06)        |
| No                                                                  | 1 585 (37.2)                                     | Ref.                    | 887 (20.5)         | Ref.                    | 781 (18.0)         | Ref.                    | 604 (13.9)               | Ref.                    |
| <b>High HDL-C (≥1.03 mmol/L)</b>                                    |                                                  |                         |                    |                         |                    |                         |                          |                         |
| Yes                                                                 | 3 673 (33.4)                                     | <b>0.79 (0.70-0.90)</b> | 2 130 (19.1)       | <b>0.8 (0.69-0.94)</b>  | 1 749 (15.6)       | <b>0.69 (0.58-0.82)</b> | 1 132 (10.1)             | <b>0.78 (0.62-0.98)</b> |
| No                                                                  | 283 (35.9)                                       | Ref.                    | 171 (21.4)         | Ref.                    | 149 (18.6)         | Ref.                    | 82 (10.2)                | Ref.                    |
| <b>High LDL-C/HDL-C (≥3.50)</b>                                     |                                                  |                         |                    |                         |                    |                         |                          |                         |
| Yes                                                                 | 425 (29.7)                                       | 1.04 (0.94-1.16)        | 265 (18.4)         | 1.03 (0.90-1.18)        | 206 (14.2)         | 1.12 (0.96-1.30)        | 91 (6.2)                 | 0.94 (0.76-1.18)        |
| No                                                                  | 3 450 (34.2)                                     | Ref.                    | 1 992 (19.5)       | Ref.                    | 1 648 (16.1)       | Ref.                    | 1 099 (10.7)             | Ref.                    |
| <b>High ApoA-I (≥1.00 mmol/L in male and 1.10 mmol/L in female)</b> |                                                  |                         |                    |                         |                    |                         |                          |                         |
| Yes                                                                 | 3 189 (33.6)                                     | 0.89 (0.72-1.09)        | 1 868 (19.5)       | 0.94 (0.71-1.25)        | 1 541 (16.0)       | 1.09 (0.79-1.52)        | 971 (10.0)               | 0.81 (0.57-1.15)        |
| No                                                                  | 90 (38.9)                                        | Ref.                    | 49 (20.9)          | Ref.                    | 36 (15.2)          | Ref.                    | 33 (14.0)                | Ref.                    |
| <b>High ApoB (≥0.90 mmol/L)</b>                                     |                                                  |                         |                    |                         |                    |                         |                          |                         |
| Yes                                                                 | 1 983 (32.1)                                     | 0.97 (0.88-1.07)        | 1 165 (18.7)       | 0.96 (0.84-1.09)        | 957 (15.3)         | 1.04 (0.90-1.20)        | 559 (8.9)                | 0.91 (0.78-1.07)        |
| No                                                                  | 578 (36.8)                                       | Ref.                    | 313 (19.6)         | Ref.                    | 270 (16.9)         | Ref.                    | 238 (14.8)               | Ref.                    |
| <b>High ApoB/ApoA-I (≥0.90 in male and 0.80 in female)</b>          |                                                  |                         |                    |                         |                    |                         |                          |                         |
| Yes                                                                 | 843 (31.9)                                       | 1.08 (0.98-1.18)        | 511 (19.1)         | 1.09 (0.97-1.23)        | 412 (15.4)         | 1.15 (1.00-1.31)        | 217 (8.05)               | 1.07 (0.91-1.27)        |
| No                                                                  | 1 215 (32.3)                                     | Ref.                    | 674 (17.7)         | Ref.                    | 584 (15.3)         | Ref.                    | 411 (10.7)               | Ref.                    |

Abbreviations: ApoA-I: apolipoprotein A-I; ApoB: apolipoprotein B; HDL-C: high-density lipoprotein cholesterol; LDL-C: low-density lipoprotein cholesterol; Ref.: Reference

<sup>a</sup>Adjusted for age at first blood sampling, sex, fasting status at first blood sampling, country of birth, and socioeconomic status

<sup>b</sup>Statistically significant estimates are highlighted with bold

eTable 5. Incidence rates (IR) per 10 000 person-years and adjusted hazard ratios (aHR) with 95% confidence intervals (CI) of depression, anxiety, or stress-related disorders for one standard deviation increase in the levels of carbohydrate, lipid, and apolipoprotein biomarkers among the 161 237 definitely employed individuals – a study based on AMORIS Cohort

| Biomarkers <sup>a,b</sup> | Depression, anxiety, or stress-related disorders |                         | Depression         |                         | Anxiety            |                         | Stress-related disorders |                         |
|---------------------------|--------------------------------------------------|-------------------------|--------------------|-------------------------|--------------------|-------------------------|--------------------------|-------------------------|
|                           | No. of events (IR)                               | aHR (95% CI)            | No. of events (IR) | aHR (95% CI)            | No. of events (IR) | aHR (95% CI)            | No. of events (IR)       | aHR (95% CI)            |
| <b>Glucose</b>            | 11 821 (34.8)                                    | <b>1.05 (1.03-1.07)</b> | 7 011 (20.4)       | <b>1.06 (1.04-1.09)</b> | 5 538 (16.0)       | <b>1.05 (1.02-1.08)</b> | 3 624 (10.5)             | <b>1.05 (1.02-1.09)</b> |
| <b>Total cholesterol</b>  | 11 821 (34.8)                                    | 1.02 (1.00-1.04)        | 7 011 (20.4)       | 1.02 (1.00-1.05)        | 5 538 (16.0)       | 1.03 (1.00-1.06)        | 3 624 (10.5)             | 0.99 (0.95-1.03)        |
| <b>Triglycerides</b>      | 11 821 (34.8)                                    | <b>1.07 (1.05-1.08)</b> | 7 011 (20.4)       | <b>1.07 (1.05-1.09)</b> | 5 538 (16.0)       | <b>1.08 (1.05-1.10)</b> | 3 624 (10.5)             | <b>1.07 (1.04-1.11)</b> |
| <b>LDL-C</b>              | 4 010 (33.6)                                     | 0.99 (0.96-1.03)        | 2 348 (19.5)       | 0.98 (0.93-1.02)        | 1 907 (15.7)       | 1.03 (0.98-1.08)        | 1 224 (10.1)             | 0.97 (0.91-1.05)        |
| <b>HDL-C</b>              | 3 956 (33.6)                                     | <b>0.94 (0.91-0.97)</b> | 2 301 (19.3)       | <b>0.94 (0.90-0.99)</b> | 1 898 (15.8)       | <b>0.93 (0.89-0.98)</b> | 1 214 (10.1)             | <b>0.93 (0.87-0.99)</b> |
| <b>LDL-C/HDL-C</b>        | 3 875 (33.7)                                     | 1.03 (0.99-1.07)        | 2 257 (19.4)       | 1.01 (0.96-1.06)        | 1 854 (15.8)       | 1.06 (1.00-1.12)        | 1 190 (10.1)             | 1.03 (0.96-1.10)        |
| <b>ApoA-I</b>             | 3 279 (33.8)                                     | 0.97 (0.93-1.00)        | 1 917 (19.5)       | 0.98 (0.93-1.02)        | 1 577 (16.0)       | 0.97 (0.92-1.03)        | 1 004 (10.1)             | 0.97 (0.91-1.04)        |
| <b>ApoB</b>               | 2 561 (33.1)                                     | 1.01 (0.96-1.06)        | 1 478 (18.9)       | 1.01 (0.95-1.07)        | 1 227 (15.6)       | 1.04 (0.97-1.11)        | 797 (10.1)               | 0.97 (0.89-1.07)        |
| <b>ApoB/ApoA-I</b>        | 2 058 (32.1)                                     | 1.04 (0.99-1.10)        | 1 185 (18.3)       | 1.04 (0.98-1.11)        | 996 (15.3)         | 1.04 (0.97-1.12)        | 628 (9.6)                | 1.04 (0.94-1.15)        |

Abbreviations: ApoA-I: apolipoprotein A-I; ApoB: apolipoprotein B; HDL-C: high-density lipoprotein cholesterol; LDL-C: low-density lipoprotein cholesterol; Ref.: Reference

<sup>a</sup>Adjusted for age at first blood sampling, sex, fasting status, country of birth, and socioeconomic status;

<sup>b</sup>Statistically significant estimates are highlighted with bold

eTable 6. Incidence rates (IR) per 10 000 person-years and adjusted hazard ratios (aHR) with 95% confidence intervals (CI) of depression, anxiety, or stress-related disorders in relation to high versus low levels of carbohydrate, lipid, and apolipoprotein biomarkers among individuals with biomarker measured through referral by outpatient care – a study based on AMORIS Cohort

| Biomarkers <sup>a,b</sup>                                           | Depression, anxiety, or stress-related disorders |                         | Depression         |                         | Anxiety            |                         | Stress-related disorders |                         |
|---------------------------------------------------------------------|--------------------------------------------------|-------------------------|--------------------|-------------------------|--------------------|-------------------------|--------------------------|-------------------------|
|                                                                     | No. of events (IR)                               | aHR (95% CI)            | No. of events (IR) | aHR (95% CI)            | No. of events (IR) | aHR (95% CI)            | No. of events (IR)       | aHR (95% CI)            |
| <b>High glucose (≥6.11 mmol/L)</b>                                  |                                                  |                         |                    |                         |                    |                         |                          |                         |
| Yes                                                                 | 1 389 (61.8)                                     | <b>1.21 (1.14-1.28)</b> | 964 (42.3)         | <b>1.27 (1.19-1.36)</b> | 578 (25.0)         | 1.09 (1.00-1.19)        | 242 (10.4)               | 1.04 (0.91-1.18)        |
| No                                                                  | 24 147 (60.0)                                    | Ref.                    | 14 774 (35.9)      | Ref.                    | 12 239 (29.5)      | Ref.                    | 7 628 (18.2)             | Ref.                    |
| <b>High total cholesterol (≥5.00 mmol/L)</b>                        |                                                  |                         |                    |                         |                    |                         |                          |                         |
| Yes                                                                 | 16 538 (55.7)                                    | <b>0.96 (0.93-0.99)</b> | 10 537 (34.9)      | <b>0.96 (0.93-0.99)</b> | 7 968 (26.2)       | 0.98 (0.94-1.02)        | 3 979 (12.9)             | 0.96 (0.91-1.00)        |
| No                                                                  | 10 101 (67.4)                                    | Ref.                    | 5 916 (38.4)       | Ref.                    | 5 330 (34.4)       | Ref.                    | 4 108 (26.3)             | Ref.                    |
| <b>High triglycerides (≥1.71 mmol/L)</b>                            |                                                  |                         |                    |                         |                    |                         |                          |                         |
| Yes                                                                 | 5 220 (57.8)                                     | <b>1.14 (1.10-1.17)</b> | 3 389 (36.8)       | <b>1.14 (1.10-1.19)</b> | 2 471 (26.7)       | <b>1.14 (1.09-1.19)</b> | 1 247 (13.3)             | <b>1.14 (1.07-1.21)</b> |
| No                                                                  | 21 330 (60.1)                                    | Ref.                    | 13 008 (35.9)      | Ref.                    | 10 786 (29.5)      | Ref.                    | 6 822 (18.5)             | Ref.                    |
| <b>High LDL-C (≥3.00 mmol/L)</b>                                    |                                                  |                         |                    |                         |                    |                         |                          |                         |
| Yes                                                                 | 7 790 (50.3)                                     | <b>0.85 (0.81-0.89)</b> | 5 000 (31.8)       | <b>0.83 (0.79-0.88)</b> | 3 765 (23.7)       | <b>0.88 (0.83-0.94)</b> | 1 538 (9.6)              | <b>0.84 (0.78-0.92)</b> |
| No                                                                  | 3 027 (64.8)                                     | Ref.                    | 1 858 (38.8)       | Ref.                    | 1 577 (32.7)       | Ref.                    | 1 027 (21.1)             | Ref.                    |
| <b>High HDL-C (≥1.03 mmol/L)</b>                                    |                                                  |                         |                    |                         |                    |                         |                          |                         |
| Yes                                                                 | 9 614 (54.4)                                     | 0.99 (0.92-1.06)        | 6 093 (33.9)       | 1.02 (0.93-1.11)        | 4 754 (26.2)       | 0.94 (0.84-1.04)        | 2 298 (12.5)             | 0.92 (0.79-1.06)        |
| No                                                                  | 858 (46.2)                                       | Ref.                    | 547 (29.0)         | Ref.                    | 419 (22.1)         | Ref.                    | 203 (10.6)               | Ref.                    |
| <b>High LDL-C/HDL-C (≥3.50)</b>                                     |                                                  |                         |                    |                         |                    |                         |                          |                         |
| Yes                                                                 | 1 847 (45.5)                                     | 0.96 (0.91-1.01)        | 1 217 (29.6)       | 0.96 (0.90-1.02)        | 857 (20.7)         | 0.97 (0.90-1.04)        | 322 (7.7)                | 0.91 (0.80-1.02)        |
| No                                                                  | 8 638 (55.7)                                     | Ref.                    | 5 429 (34.4)       | Ref.                    | 4 326 (27.2)       | Ref.                    | 2 177 (13.5)             | Ref.                    |
| <b>High ApoA-I (≥1.00 mmol/L in male and 1.10 mmol/L in female)</b> |                                                  |                         |                    |                         |                    |                         |                          |                         |
| Yes                                                                 | 9 656 (54.0)                                     | <b>0.88 (0.78-0.99)</b> | 6 138 (33.7)       | <b>0.88 (0.76-1.02)</b> | 4 766 (26.0)       | 0.86 (0.73-1.01)        | 2 266 (12.2)             | 0.90 (0.73-1.12)        |
| No                                                                  | 292 (61.5)                                       | Ref.                    | 183 (37.7)         | Ref.                    | 153 (31.3)         | Ref.                    | 83 (16.8)                | Ref.                    |
| <b>High ApoB (≥0.90 mmol/L)</b>                                     |                                                  |                         |                    |                         |                    |                         |                          |                         |
| Yes                                                                 | 8 303 (51.3)                                     | <b>0.81 (0.77-0.86)</b> | 5 335 (32.4)       | <b>0.82 (0.77-0.88)</b> | 4 044 (24.4)       | <b>0.82 (0.76-0.89)</b> | 1 744 (10.4)             | 0.79 (0.72-0.87)        |
| No                                                                  | 1 721 (73.5)                                     | Ref.                    | 1 021 (42.3)       | Ref.                    | 929 (38.3)         | Ref.                    | 637 (25.9)               | Ref.                    |
| <b>High ApoB/ApoA-I (≥0.90 in male and 0.80 in female)</b>          |                                                  |                         |                    |                         |                    |                         |                          |                         |
| Yes                                                                 | 5 226 (49.5)                                     | <b>0.91 (0.88-0.95)</b> | 3 394 (31.7)       | <b>0.92 (0.88-0.97)</b> | 2 461 (22.8)       | <b>0.88 (0.83-0.93)</b> | 995 (9.2)                | <b>0.87 (0.80-0.95)</b> |
| No                                                                  | 4 746 (59.8)                                     | Ref.                    | 2 930 (36.2)       | Ref.                    | 2 484 (30.4)       | Ref.                    | 1 354 (16.4)             | Ref.                    |

Abbreviations: ApoA-I: apolipoprotein A-I; ApoB: apolipoprotein B; HDL-C: high-density lipoprotein cholesterol; LDL-C: low-density lipoprotein cholesterol; Ref.: Reference

<sup>a</sup>Adjusted for age at first blood sampling, sex, fasting status, country of birth, and socioeconomic status

<sup>b</sup>Statistically significant estimates are highlighted with bold

| eTable 7. Number (%) of participants with diagnosis of depression, anxiety and stress-related disorders among individuals with low, high or missing socioeconomic status. |                                                 |              |              |                          |
|---------------------------------------------------------------------------------------------------------------------------------------------------------------------------|-------------------------------------------------|--------------|--------------|--------------------------|
| Socioeconomic status                                                                                                                                                      | Depression, Anxiety or Stress-related disorders | Depression   | Anxiety      | Stress-related disorders |
| Low income                                                                                                                                                                | 8 166 (8.5%)                                    | 4 896 (5.1%) | 3 962 (4.1%) | 2 331 (2.4%)             |
| High income                                                                                                                                                               | 5 967 (6.7%)                                    | 3 635 (4.1%) | 2 579 (2.9%) | 1 735 (1.9%)             |
| Missing                                                                                                                                                                   | 2 251 (9.0%)                                    | 1 274 (5.1%) | 1 092 (4.4%) | 816 (3.3%)               |



eTable 8. Incidence rates (IR) per 10 000 person-years and adjusted hazard ratios (aHR) with 95% confidence intervals (CI) of depression, anxiety, or stress-related disorders in relation to high versus low levels of carbohydrate, lipid, and apolipoprotein biomarkers, excluding from the analysis individuals missing socioeconomic status – a study based on AMORIS Cohort

| Biomarkers <sup>a,b</sup>                                                            | Depression, anxiety, or stress-related disorders |                         | Depression         |                         | Anxiety            |                         | Stress-related disorders |                         |
|--------------------------------------------------------------------------------------|--------------------------------------------------|-------------------------|--------------------|-------------------------|--------------------|-------------------------|--------------------------|-------------------------|
|                                                                                      | No. of events (IR)                               | aHR (95% CI)            | No. of events (IR) | aHR (95% CI)            | No. of events (IR) | aHR (95% CI)            | No. of events (IR)       | aHR (95% CI)            |
| <b>High glucose (<math>\geq 6.11</math> mmol/L)</b>                                  |                                                  |                         |                    |                         |                    |                         |                          |                         |
| Yes                                                                                  | 549 (40.2)                                       | <b>1.30 (1.19-1.42)</b> | 373 (27.0)         | <b>1.37 (1.24-1.53)</b> | 226 (16.2)         | <b>1.20 (1.05-1.37)</b> | 109 (7.8)                | 1.21 (1.00-1.47)        |
| No                                                                                   | 11 552 (34.8)                                    | Ref.                    | 6 879 (20.5)       | Ref.                    | 5 408 (16.0)       | Ref.                    | 3 446 (10.2)             | Ref.                    |
| <b>High total cholesterol (<math>\geq 5.00</math> mmol/L)</b>                        |                                                  |                         |                    |                         |                    |                         |                          |                         |
| Yes                                                                                  | 8 013 (34.2)                                     | 1.02 (0.98-1.07)        | 4 965 (20.9)       | 1.01 (0.96-1.07)        | 3 692 (15.5)       | 1.06 (1.00-1.12)        | 1 949 (8.1)              | 1.00 (0.93-1.07)        |
| No                                                                                   | 4 537 (36.5)                                     | Ref.                    | 2 580 (20.5)       | Ref.                    | 2 146 (16.9)       | Ref.                    | 1 709 (13.4)             | Ref.                    |
| <b>High triglycerides (<math>\geq 1.71</math> mmol/L)</b>                            |                                                  |                         |                    |                         |                    |                         |                          |                         |
| Yes                                                                                  | 2 199 (35.0)                                     | <b>1.15 (1.10-1.21)</b> | 1 427 (22.5)       | <b>1.19 (1.12-1.26)</b> | 973 (15.2)         | <b>1.13 (1.05-1.21)</b> | 550 (8.6)                | <b>1.21 (1.10-1.33)</b> |
| No                                                                                   | 10 282 (34.9)                                    | Ref.                    | 6 080 (20.4)       | Ref.                    | 4 833 (16.1)       | Ref.                    | 3 090 (10.3)             | Ref.                    |
| <b>High LDL-C (<math>\geq 3.00</math> mmol/L)</b>                                    |                                                  |                         |                    |                         |                    |                         |                          |                         |
| Yes                                                                                  | 3 534 (32.7)                                     | 1.00 (0.94-1.06)        | 2 209 (20.2)       | 0.98 (0.91-1.06)        | 1 609 (14.6)       | 0.98 (0.90-1.07)        | 824 (7.5)                | 0.98 (0.88-1.09)        |
| No                                                                                   | 1 870 (35.8)                                     | Ref.                    | 1 085 (20.5)       | Ref.                    | 908 (17.1)         | Ref.                    | 671 (12.6)               | Ref.                    |
| <b>High HDL-C (<math>\geq 1.03</math> mmol/L)</b>                                    |                                                  |                         |                    |                         |                    |                         |                          |                         |
| Yes                                                                                  | 5 249 (33.6)                                     | 0.93 (0.83-1.03)        | 3 162 (20.0)       | 0.95 (0.83-1.09)        | 2 820 (16.0)       | <b>0.83 (0.71-0.96)</b> | 1 481 (9.3)              | 0.88 (0.71-1.07)        |
| No                                                                                   | 372 (33.2)                                       | Ref.                    | 226 (18.6)         | Ref.                    | 228 (16.6)         | Ref.                    | 102 (8.84)               | Ref.                    |
| <b>High LDL-C/HDL-C (<math>\geq 3.50</math>)</b>                                     |                                                  |                         |                    |                         |                    |                         |                          |                         |
| Yes                                                                                  | 615 (30.0)                                       | 1.02 (0.94-1.12)        | 390 (18.8)         | 1.00 (0.90-1.12)        | 291 (14.0)         | 1.09 (0.96-1.24)        | 115 (5.5)                | 0.90 (0.74-1.09)        |
| No                                                                                   | 4 557 (34.2)                                     | Ref.                    | 2 737 (20.3)       | Ref.                    | 2 131 (15.7)       | Ref.                    | 1 336 (9.8)              | Ref.                    |
| <b>High ApoA-I (<math>\geq 1.00</math> mmol/L in male and 1.10 mmol/L in female)</b> |                                                  |                         |                    |                         |                    |                         |                          |                         |
| Yes                                                                                  | 4 580 (33.1)                                     | 0.94 (0.78-1.13)        | 2 773 (19.8)       | 0.84 (0.67-1.06)        | 2 181 (15.5)       | 1.08 (0.81-1.42)        | 1 258 (8.9)              | 0.86 (0.63-1.18)        |
| No                                                                                   | 117 (35.8)                                       | Ref.                    | 77 (23.4)          | Ref.                    | 50 (15.0)          | Ref.                    | 40 (12.0)                | Ref.                    |
| <b>High ApoB (<math>\geq 0.90</math> mmol/L)</b>                                     |                                                  |                         |                    |                         |                    |                         |                          |                         |
| Yes                                                                                  | 3 168 (31.8)                                     | 0.94 (0.86-1.02)        | 1 935 (19.2)       | 0.92 (0.82-1.02)        | 1 505 (14.9)       | 1.02 (0.91-1.15)        | 782 (7.7)                | 0.87 (0.76-1.00)        |
| No                                                                                   | 811 (36.1)                                       | Ref.                    | 458 (20.1)         | Ref.                    | 374 (16.3)         | Ref.                    | 313 (13.6)               | Ref.                    |
| <b>High ApoB/ApoA-I (<math>\geq 0.90</math> in male and 0.80 in female)</b>          |                                                  |                         |                    |                         |                    |                         |                          |                         |
| Yes                                                                                  | 1 425 (31.6)                                     | 1.04 (0.97-1.12)        | 886 (19.5)         | 1.03 (0.94-1.13)        | 688 (15.0)         | 1.11 (1.00-1.23)        | 308 (6.7)                | 0.97 (0.84-1.11)        |
| No                                                                                   | 1 881 (32.0)                                     | Ref.                    | 1 108 (18.7)       | Ref.                    | 892 (15.0)         | Ref.                    | 586 (9.8)                | Ref.                    |

Abbreviations: ApoA-I: apolipoprotein A-I; ApoB: apolipoprotein B; HDL-C: high-density lipoprotein cholesterol; LDL-C: low-density lipoprotein cholesterol; Ref.: Reference

<sup>a</sup>Adjusted for age at first blood sampling, sex, fasting status, country of birth, and socioeconomic status

<sup>b</sup>Statistically significant estimates are highlighted with bold

eTable 9. Observed and predicted biomarker levels among cases and controls during up to 30 years before diagnosis of the cases and their matched controls

| Depression, Anxiety or Stress-related disorders |          |      |      |                       |      |      |          |      |      |                       |      |      |
|-------------------------------------------------|----------|------|------|-----------------------|------|------|----------|------|------|-----------------------|------|------|
| Glucose                                         |          |      |      |                       |      |      |          |      |      |                       |      |      |
| Time since index date                           | Cases    |      |      |                       |      |      | Controls |      |      |                       |      |      |
|                                                 | Observed |      |      | Predicted             |      |      | Observed |      |      | Predicted             |      |      |
|                                                 | Number   | Mean | SD   | Time since index date | Mean | SE   | Number   | Mean | SD   | Time since index date | Mean | SE   |
| 0                                               | 64       | 5,44 | 1,93 | 0,00                  | 5,65 | 0,13 | 660      | 5,15 | 1,05 | 0,00                  | 5,12 | 0,02 |
| 1                                               | 101      | 5,94 | 2,61 | 0,61                  | 5,63 | 0,10 | 941      | 5,08 | 0,96 | 0,61                  | 5,11 | 0,02 |
| 2                                               | 139      | 5,51 | 1,99 | 1,22                  | 5,60 | 0,09 | 1186     | 5,09 | 1,16 | 1,22                  | 5,10 | 0,01 |
| 3                                               | 158      | 5,45 | 1,62 | 1,84                  | 5,57 | 0,08 | 1523     | 5,08 | 1,17 | 1,84                  | 5,09 | 0,01 |
| 4                                               | 211      | 5,58 | 2,21 | 2,45                  | 5,54 | 0,07 | 2323     | 5,01 | 0,99 | 2,45                  | 5,08 | 0,01 |
| 5                                               | 501      | 5,37 | 1,92 | 3,06                  | 5,50 | 0,07 | 3726     | 5,04 | 1,14 | 3,06                  | 5,07 | 0,01 |
| 6                                               | 544      | 5,20 | 1,51 | 3,67                  | 5,47 | 0,06 | 5498     | 5,04 | 1,21 | 3,67                  | 5,06 | 0,01 |
| 7                                               | 703      | 5,24 | 1,69 | 4,29                  | 5,43 | 0,06 | 6547     | 5,05 | 1,17 | 4,29                  | 5,05 | 0,01 |
| 8                                               | 733      | 5,19 | 1,54 | 4,90                  | 5,39 | 0,05 | 7440     | 5,01 | 1,14 | 4,90                  | 5,05 | 0,01 |
| 9                                               | 850      | 5,22 | 1,66 | 5,51                  | 5,35 | 0,05 | 8468     | 5,02 | 1,13 | 5,51                  | 5,04 | 0,01 |
| 10                                              | 979      | 5,10 | 1,44 | 6,12                  | 5,32 | 0,04 | 9790     | 4,99 | 1,10 | 6,12                  | 5,03 | 0,01 |
| 11                                              | 1072     | 5,00 | 1,15 | 6,73                  | 5,28 | 0,03 | 10938    | 4,97 | 1,11 | 6,73                  | 5,02 | 0,01 |
| 12                                              | 1255     | 5,02 | 1,35 | 7,35                  | 5,25 | 0,03 | 12075    | 4,96 | 1,14 | 7,35                  | 5,01 | 0,01 |
| 13                                              | 1320     | 5,07 | 1,38 | 7,96                  | 5,22 | 0,03 | 13057    | 4,94 | 1,07 | 7,96                  | 5,00 | 0,01 |
| 14                                              | 1424     | 4,99 | 1,25 | 8,57                  | 5,18 | 0,02 | 13900    | 4,92 | 1,09 | 8,57                  | 5,00 | 0,01 |
| 15                                              | 1522     | 5,01 | 1,23 | 9,18                  | 5,15 | 0,02 | 14341    | 4,90 | 1,03 | 9,18                  | 4,99 | 0,00 |
| 16                                              | 1522     | 4,95 | 1,37 | 9,80                  | 5,13 | 0,02 | 15150    | 4,90 | 1,08 | 9,80                  | 4,98 | 0,00 |
| 17                                              | 1618     | 4,92 | 1,02 | 10,41                 | 5,10 | 0,02 | 15035    | 4,90 | 1,11 | 10,41                 | 4,97 | 0,00 |
| 18                                              | 1576     | 4,90 | 0,93 | 11,02                 | 5,08 | 0,02 | 15414    | 4,89 | 1,01 | 11,02                 | 4,97 | 0,00 |
| 19                                              | 1626     | 4,92 | 1,14 | 11,63                 | 5,05 | 0,02 | 15433    | 4,88 | 1,01 | 11,63                 | 4,96 | 0,00 |
| 20                                              | 1553     | 4,89 | 1,02 | 12,24                 | 5,03 | 0,02 | 15026    | 4,87 | 1,00 | 12,24                 | 4,95 | 0,00 |
| 21                                              | 1526     | 4,93 | 1,07 | 12,86                 | 5,02 | 0,01 | 14918    | 4,86 | 0,95 | 12,86                 | 4,95 | 0,00 |
| 22                                              | 1443     | 4,90 | 1,02 | 13,47                 | 5,00 | 0,01 | 14275    | 4,85 | 0,93 | 13,47                 | 4,94 | 0,00 |
| 23                                              | 1471     | 4,89 | 0,96 | 14,08                 | 4,98 | 0,01 | 13816    | 4,84 | 0,85 | 14,08                 | 4,93 | 0,00 |
| 24                                              | 1269     | 4,85 | 0,99 | 14,69                 | 4,97 | 0,01 | 12613    | 4,83 | 0,93 | 14,69                 | 4,92 | 0,00 |
| 25                                              | 1085     | 4,90 | 1,35 | 15,31                 | 4,96 | 0,01 | 11194    | 4,80 | 0,89 | 15,31                 | 4,92 | 0,00 |
| 26                                              | 1002     | 4,73 | 0,68 | 15,92                 | 4,95 | 0,01 | 9454     | 4,78 | 0,87 | 15,92                 | 4,91 | 0,00 |
| 27                                              | 847      | 4,73 | 0,74 | 16,53                 | 4,94 | 0,01 | 8135     | 4,74 | 0,83 | 16,53                 | 4,90 | 0,00 |
| 28                                              | 761      | 4,77 | 0,79 | 17,14                 | 4,93 | 0,01 | 6697     | 4,74 | 0,87 | 17,14                 | 4,90 | 0,00 |
| 29                                              | 581      | 4,71 | 0,57 | 17,76                 | 4,92 | 0,01 | 5444     | 4,74 | 0,91 | 17,76                 | 4,89 | 0,00 |
| 30                                              | 473      | 4,70 | 0,72 | 18,37                 | 4,92 | 0,01 | 4256     | 4,71 | 0,72 | 18,37                 | 4,89 | 0,00 |
|                                                 |          |      |      | 18,98                 | 4,91 | 0,01 |          |      |      | 18,98                 | 4,88 | 0,00 |
|                                                 |          |      |      | 19,59                 | 4,91 | 0,01 |          |      |      | 19,59                 | 4,87 | 0,00 |
|                                                 |          |      |      | 20,20                 | 4,90 | 0,01 |          |      |      | 20,20                 | 4,87 | 0,00 |
|                                                 |          |      |      | 20,82                 | 4,89 | 0,01 |          |      |      | 20,82                 | 4,86 | 0,00 |
|                                                 |          |      |      | 21,43                 | 4,89 | 0,01 |          |      |      | 21,43                 | 4,85 | 0,00 |
|                                                 |          |      |      | 22,04                 | 4,88 | 0,01 |          |      |      | 22,04                 | 4,84 | 0,00 |
|                                                 |          |      |      | 22,65                 | 4,87 | 0,01 |          |      |      | 22,65                 | 4,84 | 0,00 |
|                                                 |          |      |      | 23,27                 | 4,87 | 0,02 |          |      |      | 23,27                 | 4,83 | 0,00 |
|                                                 |          |      |      | 23,88                 | 4,86 | 0,02 |          |      |      | 23,88                 | 4,82 | 0,00 |
|                                                 |          |      |      | 24,49                 | 4,85 | 0,02 |          |      |      | 24,49                 | 4,81 | 0,00 |
|                                                 |          |      |      | 25,10                 | 4,84 | 0,02 |          |      |      | 25,10                 | 4,80 | 0,00 |
|                                                 |          |      |      | 25,71                 | 4,82 | 0,02 |          |      |      | 25,71                 | 4,79 | 0,00 |
|                                                 |          |      |      | 26,33                 | 4,81 | 0,02 |          |      |      | 26,33                 | 4,78 | 0,00 |
|                                                 |          |      |      | 26,94                 | 4,79 | 0,02 |          |      |      | 26,94                 | 4,77 | 0,00 |
|                                                 |          |      |      | 27,55                 | 4,77 | 0,02 |          |      |      | 27,55                 | 4,76 | 0,00 |
|                                                 |          |      |      | 28,16                 | 4,75 | 0,02 |          |      |      | 28,16                 | 4,74 | 0,00 |
|                                                 |          |      |      | 28,78                 | 4,73 | 0,03 |          |      |      | 28,78                 | 4,73 | 0,00 |
|                                                 |          |      |      | 29,39                 | 4,70 | 0,03 |          |      |      | 29,39                 | 4,71 | 0,00 |
|                                                 |          |      |      | 30,00                 | 4,67 | 0,04 |          |      |      | 30,00                 | 4,70 | 0,01 |

| Depression, Anxiety or Stress-related disorders |          |      |      |                       |      |      |          |      |      |                       |      |      |
|-------------------------------------------------|----------|------|------|-----------------------|------|------|----------|------|------|-----------------------|------|------|
| Total Cholesterol                               |          |      |      |                       |      |      |          |      |      |                       |      |      |
| Time since index date                           | Cases    |      |      |                       |      |      | Controls |      |      |                       |      |      |
|                                                 | Observed |      |      | Predicted             |      |      | Observed |      |      | Predicted             |      |      |
|                                                 | Number   | Mean | SD   | Time since index date | Mean | SE   | Number   | Mean | SD   | Time since index date | Mean | SE   |
| 0                                               | 75       | 6,35 | 1,50 | 0,00                  | 6,19 | 0,07 | 689      | 5,76 | 1,05 | 0,00                  | 5,76 | 0,01 |
| 1                                               | 102      | 5,90 | 1,05 | 0,61                  | 6,12 | 0,05 | 987      | 5,71 | 1,06 | 0,61                  | 5,75 | 0,01 |
| 2                                               | 148      | 5,95 | 1,07 | 1,22                  | 6,06 | 0,04 | 1249     | 5,76 | 1,12 | 1,22                  | 5,74 | 0,01 |
| 3                                               | 162      | 5,84 | 1,05 | 1,84                  | 6,00 | 0,04 | 1596     | 5,74 | 1,13 | 1,84                  | 5,73 | 0,01 |
| 4                                               | 225      | 5,97 | 1,18 | 2,45                  | 5,95 | 0,03 | 2481     | 5,69 | 1,11 | 2,45                  | 5,72 | 0,01 |
| 5                                               | 530      | 5,80 | 1,14 | 3,06                  | 5,91 | 0,03 | 3944     | 5,63 | 1,11 | 3,06                  | 5,70 | 0,01 |
| 6                                               | 561      | 5,69 | 1,13 | 3,67                  | 5,87 | 0,03 | 5806     | 5,61 | 1,12 | 3,67                  | 5,69 | 0,01 |
| 7                                               | 746      | 5,75 | 1,23 | 4,29                  | 5,83 | 0,03 | 6941     | 5,62 | 1,16 | 4,29                  | 5,68 | 0,01 |
| 8                                               | 763      | 5,77 | 1,22 | 4,90                  | 5,80 | 0,03 | 7855     | 5,62 | 1,16 | 4,90                  | 5,67 | 0,01 |
| 9                                               | 899      | 5,65 | 1,20 | 5,51                  | 5,77 | 0,03 | 8967     | 5,60 | 1,16 | 5,51                  | 5,65 | 0,01 |
| 10                                              | 1025     | 5,67 | 1,17 | 6,12                  | 5,75 | 0,03 | 10362    | 5,60 | 1,15 | 6,12                  | 5,64 | 0,01 |
| 11                                              | 1142     | 5,65 | 1,08 | 6,73                  | 5,73 | 0,03 | 11611    | 5,57 | 1,14 | 6,73                  | 5,63 | 0,01 |
| 12                                              | 1344     | 5,58 | 1,18 | 7,35                  | 5,71 | 0,02 | 12803    | 5,56 | 1,14 | 7,35                  | 5,62 | 0,00 |
| 13                                              | 1398     | 5,63 | 1,21 | 7,96                  | 5,69 | 0,02 | 13825    | 5,55 | 1,13 | 7,96                  | 5,61 | 0,00 |
| 14                                              | 1500     | 5,58 | 1,21 | 8,57                  | 5,67 | 0,02 | 14655    | 5,54 | 1,13 | 8,57                  | 5,60 | 0,00 |
| 15                                              | 1618     | 5,58 | 1,16 | 9,18                  | 5,66 | 0,02 | 15137    | 5,54 | 1,13 | 9,18                  | 5,59 | 0,00 |
| 16                                              | 1592     | 5,59 | 1,15 | 9,80                  | 5,65 | 0,02 | 15960    | 5,54 | 1,14 | 9,80                  | 5,58 | 0,00 |
| 17                                              | 1713     | 5,55 | 1,15 | 10,41                 | 5,64 | 0,01 | 15877    | 5,55 | 1,15 | 10,41                 | 5,58 | 0,00 |
| 18                                              | 1663     | 5,51 | 1,13 | 11,02                 | 5,63 | 0,01 | 16239    | 5,53 | 1,14 | 11,02                 | 5,57 | 0,00 |
| 19                                              | 1710     | 5,50 | 1,12 | 11,63                 | 5,62 | 0,01 | 16189    | 5,54 | 1,15 | 11,63                 | 5,56 | 0,00 |
| 20                                              | 1620     | 5,58 | 1,12 | 12,24                 | 5,61 | 0,01 | 15852    | 5,55 | 1,15 | 12,24                 | 5,56 | 0,00 |
| 21                                              | 1612     | 5,56 | 1,11 | 12,86                 | 5,60 | 0,01 | 15700    | 5,53 | 1,12 | 12,86                 | 5,55 | 0,00 |
| 22                                              | 1512     | 5,56 | 1,14 | 13,47                 | 5,59 | 0,01 | 14969    | 5,54 | 1,12 | 13,47                 | 5,55 | 0,00 |
| 23                                              | 1539     | 5,51 | 1,15 | 14,08                 | 5,59 | 0,01 | 14548    | 5,55 | 1,14 | 14,08                 | 5,55 | 0,00 |
| 24                                              | 1334     | 5,55 | 1,13 | 14,69                 | 5,58 | 0,01 | 13213    | 5,53 | 1,13 | 14,69                 | 5,54 | 0,00 |
| 25                                              | 1137     | 5,58 | 1,14 | 15,31                 | 5,58 | 0,01 | 11747    | 5,53 | 1,14 | 15,31                 | 5,54 | 0,00 |
| 26                                              | 1039     | 5,47 | 1,11 | 15,92                 | 5,57 | 0,01 | 9906     | 5,52 | 1,12 | 15,92                 | 5,54 | 0,00 |
| 27                                              | 870      | 5,52 | 1,13 | 16,53                 | 5,57 | 0,01 | 8504     | 5,53 | 1,10 | 16,53                 | 5,54 | 0,00 |
| 28                                              | 789      | 5,60 | 1,17 | 17,14                 | 5,56 | 0,01 | 7002     | 5,54 | 1,14 | 17,14                 | 5,54 | 0,00 |
| 29                                              | 604      | 5,51 | 1,09 | 17,76                 | 5,56 | 0,01 | 5689     | 5,52 | 1,11 | 17,76                 | 5,54 | 0,00 |
| 30                                              | 486      | 5,45 | 1,09 | 18,37                 | 5,56 | 0,01 | 4421     | 5,45 | 1,09 | 18,37                 | 5,54 | 0,00 |
|                                                 |          |      |      | 18,98                 | 5,55 | 0,01 |          |      |      | 18,98                 | 5,54 | 0,00 |
|                                                 |          |      |      | 19,59                 | 5,55 | 0,01 |          |      |      | 19,59                 | 5,54 | 0,00 |
|                                                 |          |      |      | 20,20                 | 5,55 | 0,01 |          |      |      | 20,20                 | 5,54 | 0,00 |
|                                                 |          |      |      | 20,82                 | 5,55 | 0,01 |          |      |      | 20,82                 | 5,54 | 0,00 |
|                                                 |          |      |      | 21,43                 | 5,55 | 0,01 |          |      |      | 21,43                 | 5,54 | 0,00 |
|                                                 |          |      |      | 22,04                 | 5,54 | 0,01 |          |      |      | 22,04                 | 5,54 | 0,00 |
|                                                 |          |      |      | 22,65                 | 5,54 | 0,01 |          |      |      | 22,65                 | 5,54 | 0,00 |
|                                                 |          |      |      | 23,27                 | 5,54 | 0,02 |          |      |      | 23,27                 | 5,54 | 0,00 |
|                                                 |          |      |      | 23,88                 | 5,54 | 0,02 |          |      |      | 23,88                 | 5,54 | 0,00 |
|                                                 |          |      |      | 24,49                 | 5,54 | 0,02 |          |      |      | 24,49                 | 5,54 | 0,00 |
|                                                 |          |      |      | 25,10                 | 5,54 | 0,02 |          |      |      | 25,10                 | 5,54 | 0,00 |
|                                                 |          |      |      | 25,71                 | 5,53 | 0,02 |          |      |      | 25,71                 | 5,54 | 0,00 |
|                                                 |          |      |      | 26,33                 | 5,53 | 0,02 |          |      |      | 26,33                 | 5,53 | 0,00 |
|                                                 |          |      |      | 26,94                 | 5,53 | 0,02 |          |      |      | 26,94                 | 5,53 | 0,00 |
|                                                 |          |      |      | 27,55                 | 5,52 | 0,02 |          |      |      | 27,55                 | 5,52 | 0,00 |
|                                                 |          |      |      | 28,16                 | 5,51 | 0,02 |          |      |      | 28,16                 | 5,51 | 0,00 |
|                                                 |          |      |      | 28,78                 | 5,51 | 0,03 |          |      |      | 28,78                 | 5,50 | 0,00 |
|                                                 |          |      |      | 29,39                 | 5,50 | 0,04 |          |      |      | 29,39                 | 5,49 | 0,00 |
|                                                 |          |      |      | 30,00                 | 5,49 | 0,05 |          |      |      | 30,00                 | 5,48 | 0,00 |

| Depression, Anxiety or Stress-related disorders |          |       |      |                       |       |      |          |       |      |                       |       |      |
|-------------------------------------------------|----------|-------|------|-----------------------|-------|------|----------|-------|------|-----------------------|-------|------|
| Log2 Triglycerides                              |          |       |      |                       |       |      |          |       |      |                       |       |      |
| Time since index date                           | Cases    |       |      |                       |       |      | Controls |       |      |                       |       |      |
|                                                 | Observed |       |      | Predicted             |       |      | Observed |       |      | Predicted             |       |      |
|                                                 | Number   | Mean  | SD   | Time since index date | Mean  | SE   | Number   | Mean  | SD   | Time since index date | Mean  | SE   |
| 0                                               | 73       | 0,53  | 1,02 | 0,00                  | 0,52  | 0,02 | 686      | 0,21  | 0,79 | 0,00                  | 0,19  | 0,02 |
| 1                                               | 100      | 0,46  | 0,99 | 0,61                  | 0,48  | 0,01 | 982      | 0,20  | 0,82 | 0,61                  | 0,19  | 0,01 |
| 2                                               | 148      | 0,44  | 0,89 | 1,22                  | 0,45  | 0,01 | 1245     | 0,14  | 0,84 | 1,22                  | 0,19  | 0,01 |
| 3                                               | 161      | 0,35  | 0,99 | 1,84                  | 0,42  | 0,01 | 1590     | 0,18  | 0,83 | 1,84                  | 0,19  | 0,01 |
| 4                                               | 224      | 0,32  | 0,84 | 2,45                  | 0,39  | 0,01 | 2468     | 0,18  | 0,81 | 2,45                  | 0,19  | 0,01 |
| 5                                               | 527      | 0,25  | 0,84 | 3,06                  | 0,37  | 0,01 | 3926     | 0,17  | 0,82 | 3,06                  | 0,18  | 0,01 |
| 6                                               | 559      | 0,25  | 0,84 | 3,67                  | 0,34  | 0,01 | 5775     | 0,18  | 0,83 | 3,67                  | 0,18  | 0,01 |
| 7                                               | 744      | 0,27  | 0,83 | 4,29                  | 0,32  | 0,01 | 6905     | 0,16  | 0,82 | 4,29                  | 0,18  | 0,01 |
| 8                                               | 760      | 0,26  | 0,82 | 4,90                  | 0,30  | 0,01 | 7819     | 0,15  | 0,81 | 4,90                  | 0,17  | 0,01 |
| 9                                               | 887      | 0,21  | 0,81 | 5,51                  | 0,29  | 0,01 | 8919     | 0,15  | 0,81 | 5,51                  | 0,17  | 0,01 |
| 10                                              | 1020     | 0,24  | 0,83 | 6,12                  | 0,27  | 0,01 | 10311    | 0,14  | 0,82 | 6,12                  | 0,16  | 0,00 |
| 11                                              | 1134     | 0,26  | 0,85 | 6,73                  | 0,26  | 0,01 | 11540    | 0,13  | 0,82 | 6,73                  | 0,16  | 0,00 |
| 12                                              | 1325     | 0,17  | 0,84 | 7,35                  | 0,25  | 0,01 | 12738    | 0,11  | 0,81 | 7,35                  | 0,15  | 0,00 |
| 13                                              | 1383     | 0,19  | 0,85 | 7,96                  | 0,24  | 0,01 | 13746    | 0,10  | 0,82 | 7,96                  | 0,15  | 0,00 |
| 14                                              | 1490     | 0,18  | 0,84 | 8,57                  | 0,23  | 0,01 | 14578    | 0,09  | 0,81 | 8,57                  | 0,14  | 0,00 |
| 15                                              | 1602     | 0,11  | 0,79 | 9,18                  | 0,22  | 0,01 | 15075    | 0,09  | 0,81 | 9,18                  | 0,14  | 0,00 |
| 16                                              | 1579     | 0,14  | 0,82 | 9,80                  | 0,21  | 0,01 | 15899    | 0,08  | 0,81 | 9,80                  | 0,13  | 0,00 |
| 17                                              | 1697     | 0,13  | 0,84 | 10,41                 | 0,20  | 0,01 | 15780    | 0,08  | 0,81 | 10,41                 | 0,13  | 0,00 |
| 18                                              | 1649     | 0,07  | 0,80 | 11,02                 | 0,19  | 0,01 | 16169    | 0,08  | 0,81 | 11,02                 | 0,12  | 0,00 |
| 19                                              | 1692     | 0,10  | 0,79 | 11,63                 | 0,18  | 0,01 | 16129    | 0,07  | 0,80 | 11,63                 | 0,12  | 0,00 |
| 20                                              | 1614     | 0,12  | 0,86 | 12,24                 | 0,18  | 0,01 | 15757    | 0,07  | 0,82 | 12,24                 | 0,11  | 0,00 |
| 21                                              | 1603     | 0,12  | 0,83 | 12,86                 | 0,17  | 0,01 | 15604    | 0,07  | 0,79 | 12,86                 | 0,11  | 0,00 |
| 22                                              | 1509     | 0,11  | 0,81 | 13,47                 | 0,17  | 0,01 | 14902    | 0,06  | 0,80 | 13,47                 | 0,10  | 0,00 |
| 23                                              | 1529     | 0,11  | 0,82 | 14,08                 | 0,16  | 0,01 | 14479    | 0,07  | 0,80 | 14,08                 | 0,10  | 0,00 |
| 24                                              | 1333     | 0,08  | 0,78 | 14,69                 | 0,15  | 0,01 | 13162    | 0,05  | 0,80 | 14,69                 | 0,09  | 0,00 |
| 25                                              | 1135     | 0,10  | 0,82 | 15,31                 | 0,15  | 0,01 | 11701    | 0,04  | 0,79 | 15,31                 | 0,09  | 0,00 |
| 26                                              | 1036     | 0,07  | 0,82 | 15,92                 | 0,14  | 0,01 | 9875     | 0,03  | 0,79 | 15,92                 | 0,09  | 0,00 |
| 27                                              | 869      | 0,04  | 0,84 | 16,53                 | 0,14  | 0,01 | 8477     | 0,02  | 0,79 | 16,53                 | 0,08  | 0,00 |
| 28                                              | 788      | 0,04  | 0,82 | 17,14                 | 0,14  | 0,01 | 6976     | 0,01  | 0,79 | 17,14                 | 0,08  | 0,00 |
| 29                                              | 604      | -0,03 | 0,75 | 17,76                 | 0,13  | 0,01 | 5674     | 0,02  | 0,79 | 17,76                 | 0,08  | 0,00 |
| 30                                              | 485      | -0,02 | 0,75 | 18,37                 | 0,13  | 0,01 | 4414     | -0,02 | 0,76 | 18,37                 | 0,08  | 0,00 |
|                                                 |          |       |      | 18,98                 | 0,12  | 0,01 |          |       |      | 18,98                 | 0,07  | 0,00 |
|                                                 |          |       |      | 19,59                 | 0,12  | 0,01 |          |       |      | 19,59                 | 0,07  | 0,00 |
|                                                 |          |       |      | 20,20                 | 0,11  | 0,01 |          |       |      | 20,20                 | 0,07  | 0,00 |
|                                                 |          |       |      | 20,82                 | 0,11  | 0,01 |          |       |      | 20,82                 | 0,07  | 0,00 |
|                                                 |          |       |      | 21,43                 | 0,11  | 0,01 |          |       |      | 21,43                 | 0,06  | 0,00 |
|                                                 |          |       |      | 22,04                 | 0,10  | 0,01 |          |       |      | 22,04                 | 0,06  | 0,00 |
|                                                 |          |       |      | 22,65                 | 0,10  | 0,01 |          |       |      | 22,65                 | 0,06  | 0,00 |
|                                                 |          |       |      | 23,27                 | 0,09  | 0,01 |          |       |      | 23,27                 | 0,06  | 0,00 |
|                                                 |          |       |      | 23,88                 | 0,09  | 0,01 |          |       |      | 23,88                 | 0,05  | 0,00 |
|                                                 |          |       |      | 24,49                 | 0,08  | 0,01 |          |       |      | 24,49                 | 0,05  | 0,00 |
|                                                 |          |       |      | 25,10                 | 0,07  | 0,01 |          |       |      | 25,10                 | 0,04  | 0,00 |
|                                                 |          |       |      | 25,71                 | 0,06  | 0,01 |          |       |      | 25,71                 | 0,04  | 0,00 |
|                                                 |          |       |      | 26,33                 | 0,06  | 0,01 |          |       |      | 26,33                 | 0,03  | 0,00 |
|                                                 |          |       |      | 26,94                 | 0,05  | 0,01 |          |       |      | 26,94                 | 0,03  | 0,00 |
|                                                 |          |       |      | 27,55                 | 0,03  | 0,01 |          |       |      | 27,55                 | 0,02  | 0,00 |
|                                                 |          |       |      | 28,16                 | 0,02  | 0,01 |          |       |      | 28,16                 | 0,01  | 0,00 |
|                                                 |          |       |      | 28,78                 | 0,01  | 0,01 |          |       |      | 28,78                 | 0,01  | 0,00 |
|                                                 |          |       |      | 29,39                 | -0,01 | 0,01 |          |       |      | 29,39                 | -0,01 | 0,00 |
|                                                 |          |       |      | 30,00                 | -0,03 | 0,01 |          |       |      | 30,00                 | -0,02 | 0,01 |

| Depression, Anxiety or Stress-related disorders |          |      |      |                       |      |      |          |      |      |                       |      |      |
|-------------------------------------------------|----------|------|------|-----------------------|------|------|----------|------|------|-----------------------|------|------|
| LDL-C                                           |          |      |      |                       |      |      |          |      |      |                       |      |      |
| Time since index date                           | Cases    |      |      |                       |      |      | Controls |      |      |                       |      |      |
|                                                 | Observed |      |      | Predicted             |      |      | Observed |      |      | Predicted             |      |      |
|                                                 | Number   | Mean | SD   | Time since index date | Mean | SE   | Number   | Mean | SD   | Time since index date | Mean | SE   |
| 0                                               | 37       | 4,02 | 1,16 | 0,00                  | 3,85 | 0,07 | 286      | 3,74 | 1,00 | 0,00                  | 3,75 | 0,02 |
| 1                                               | 51       | 3,54 | 1,10 | 0,61                  | 3,83 | 0,05 | 413      | 3,75 | 0,97 | 0,61                  | 3,74 | 0,01 |
| 2                                               | 63       | 3,74 | 1,06 | 1,22                  | 3,80 | 0,04 | 497      | 3,71 | 1,05 | 1,22                  | 3,72 | 0,01 |
| 3                                               | 81       | 3,76 | 1,10 | 1,84                  | 3,78 | 0,03 | 646      | 3,71 | 1,07 | 1,84                  | 3,71 | 0,01 |
| 4                                               | 91       | 3,93 | 1,06 | 2,45                  | 3,77 | 0,03 | 979      | 3,64 | 1,03 | 2,45                  | 3,69 | 0,01 |
| 5                                               | 198      | 3,79 | 1,09 | 3,06                  | 3,75 | 0,03 | 1494     | 3,59 | 1,04 | 3,06                  | 3,68 | 0,01 |
| 6                                               | 214      | 3,61 | 1,08 | 3,67                  | 3,74 | 0,03 | 2187     | 3,60 | 1,04 | 3,67                  | 3,67 | 0,01 |
| 7                                               | 289      | 3,66 | 1,08 | 4,29                  | 3,73 | 0,03 | 2631     | 3,67 | 1,09 | 4,29                  | 3,66 | 0,01 |
| 8                                               | 272      | 3,67 | 1,13 | 4,90                  | 3,72 | 0,03 | 2881     | 3,65 | 1,07 | 4,90                  | 3,65 | 0,01 |
| 9                                               | 336      | 3,63 | 1,10 | 5,51                  | 3,71 | 0,03 | 3343     | 3,61 | 1,03 | 5,51                  | 3,64 | 0,01 |
| 10                                              | 384      | 3,67 | 1,12 | 6,12                  | 3,70 | 0,03 | 3912     | 3,62 | 1,07 | 6,12                  | 3,63 | 0,01 |
| 11                                              | 393      | 3,65 | 1,00 | 6,73                  | 3,69 | 0,03 | 4291     | 3,59 | 1,06 | 6,73                  | 3,63 | 0,01 |
| 12                                              | 475      | 3,62 | 1,09 | 7,35                  | 3,69 | 0,03 | 4588     | 3,60 | 1,07 | 7,35                  | 3,62 | 0,01 |
| 13                                              | 495      | 3,72 | 1,06 | 7,96                  | 3,68 | 0,02 | 4924     | 3,58 | 1,07 | 7,96                  | 3,62 | 0,01 |
| 14                                              | 454      | 3,65 | 1,15 | 8,57                  | 3,68 | 0,02 | 5066     | 3,59 | 1,08 | 8,57                  | 3,61 | 0,01 |
| 15                                              | 524      | 3,66 | 1,11 | 9,18                  | 3,67 | 0,02 | 5307     | 3,59 | 1,07 | 9,18                  | 3,61 | 0,01 |
| 16                                              | 545      | 3,64 | 1,07 | 9,80                  | 3,66 | 0,02 | 5430     | 3,61 | 1,07 | 9,80                  | 3,61 | 0,01 |
| 17                                              | 546      | 3,62 | 1,05 | 10,41                 | 3,66 | 0,01 | 5356     | 3,59 | 1,08 | 10,41                 | 3,60 | 0,01 |
| 18                                              | 552      | 3,55 | 1,12 | 11,02                 | 3,65 | 0,01 | 5385     | 3,58 | 1,06 | 11,02                 | 3,60 | 0,01 |
| 19                                              | 551      | 3,52 | 1,05 | 11,63                 | 3,65 | 0,01 | 5458     | 3,59 | 1,08 | 11,63                 | 3,60 | 0,00 |
| 20                                              | 517      | 3,58 | 1,07 | 12,24                 | 3,64 | 0,01 | 5175     | 3,60 | 1,08 | 12,24                 | 3,60 | 0,00 |
| 21                                              | 528      | 3,57 | 1,07 | 12,86                 | 3,64 | 0,01 | 5040     | 3,60 | 1,05 | 12,86                 | 3,60 | 0,00 |
| 22                                              | 487      | 3,58 | 1,08 | 13,47                 | 3,64 | 0,01 | 4819     | 3,58 | 1,07 | 13,47                 | 3,60 | 0,00 |
| 23                                              | 503      | 3,49 | 1,01 | 14,08                 | 3,63 | 0,01 | 4605     | 3,58 | 1,09 | 14,08                 | 3,59 | 0,00 |
| 24                                              | 420      | 3,57 | 1,07 | 14,69                 | 3,63 | 0,01 | 3957     | 3,57 | 1,09 | 14,69                 | 3,59 | 0,00 |
| 25                                              | 314      | 3,58 | 1,09 | 15,31                 | 3,62 | 0,01 | 3442     | 3,56 | 1,08 | 15,31                 | 3,59 | 0,00 |
| 26                                              | 299      | 3,40 | 0,98 | 15,92                 | 3,62 | 0,01 | 2819     | 3,55 | 1,08 | 15,92                 | 3,59 | 0,00 |
| 27                                              | 254      | 3,59 | 1,11 | 16,53                 | 3,61 | 0,01 | 2327     | 3,54 | 1,05 | 16,53                 | 3,59 | 0,00 |
| 28                                              | 216      | 3,51 | 1,08 | 17,14                 | 3,60 | 0,01 | 1866     | 3,59 | 1,12 | 17,14                 | 3,59 | 0,00 |
| 29                                              | 167      | 3,51 | 1,09 | 17,76                 | 3,60 | 0,01 | 1438     | 3,52 | 1,06 | 17,76                 | 3,59 | 0,00 |
| 30                                              | 99       | 3,37 | 1,18 | 18,37                 | 3,59 | 0,01 | 1076     | 3,47 | 1,02 | 18,37                 | 3,59 | 0,00 |
|                                                 |          |      |      | 18,98                 | 3,59 | 0,01 |          |      |      | 18,98                 | 3,59 | 0,00 |
|                                                 |          |      |      | 19,59                 | 3,58 | 0,01 |          |      |      | 19,59                 | 3,59 | 0,00 |
|                                                 |          |      |      | 20,20                 | 3,58 | 0,01 |          |      |      | 20,20                 | 3,59 | 0,00 |
|                                                 |          |      |      | 20,82                 | 3,57 | 0,02 |          |      |      | 20,82                 | 3,59 | 0,00 |
|                                                 |          |      |      | 21,43                 | 3,57 | 0,02 |          |      |      | 21,43                 | 3,59 | 0,00 |
|                                                 |          |      |      | 22,04                 | 3,56 | 0,02 |          |      |      | 22,04                 | 3,59 | 0,00 |
|                                                 |          |      |      | 22,65                 | 3,55 | 0,02 |          |      |      | 22,65                 | 3,58 | 0,00 |
|                                                 |          |      |      | 23,27                 | 3,55 | 0,02 |          |      |      | 23,27                 | 3,58 | 0,00 |
|                                                 |          |      |      | 23,88                 | 3,54 | 0,03 |          |      |      | 23,88                 | 3,58 | 0,00 |
|                                                 |          |      |      | 24,49                 | 3,53 | 0,03 |          |      |      | 24,49                 | 3,57 | 0,01 |
|                                                 |          |      |      | 25,10                 | 3,53 | 0,03 |          |      |      | 25,10                 | 3,57 | 0,01 |
|                                                 |          |      |      | 25,71                 | 3,52 | 0,03 |          |      |      | 25,71                 | 3,56 | 0,01 |
|                                                 |          |      |      | 26,33                 | 3,51 | 0,03 |          |      |      | 26,33                 | 3,56 | 0,01 |
|                                                 |          |      |      | 26,94                 | 3,50 | 0,03 |          |      |      | 26,94                 | 3,55 | 0,01 |
|                                                 |          |      |      | 27,55                 | 3,49 | 0,03 |          |      |      | 27,55                 | 3,54 | 0,01 |
|                                                 |          |      |      | 28,16                 | 3,48 | 0,04 |          |      |      | 28,16                 | 3,53 | 0,01 |
|                                                 |          |      |      | 28,78                 | 3,47 | 0,04 |          |      |      | 28,78                 | 3,52 | 0,01 |
|                                                 |          |      |      | 29,39                 | 3,45 | 0,05 |          |      |      | 29,39                 | 3,51 | 0,02 |
|                                                 |          |      |      | 30,00                 | 3,44 | 0,07 |          |      |      | 30,00                 | 3,49 | 0,02 |

| Depression, Anxiety or Stress-related disorders |          |      |      |                       |      |      |          |      |      |                       |      |      |
|-------------------------------------------------|----------|------|------|-----------------------|------|------|----------|------|------|-----------------------|------|------|
| HDL-C                                           |          |      |      |                       |      |      |          |      |      |                       |      |      |
| Time since index date                           | Cases    |      |      |                       |      |      | Controls |      |      |                       |      |      |
|                                                 | Observed |      |      | Predicted             |      |      | Observed |      |      | Predicted             |      |      |
|                                                 | Number   | Mean | SD   | Time since index date | Mean | SE   | Number   | Mean | SD   | Time since index date | Mean | SE   |
| 0                                               | 16       | 1,50 | 0,27 | 0,00                  | 1,53 | 0,02 | 196      | 1,55 | 0,37 | 0,00                  | 1,56 | 0,01 |
| 1                                               | 25       | 1,58 | 0,39 | 0,61                  | 1,54 | 0,02 | 253      | 1,56 | 0,43 | 0,61                  | 1,56 | 0,01 |
| 2                                               | 27       | 1,55 | 0,38 | 1,22                  | 1,54 | 0,02 | 336      | 1,58 | 0,38 | 1,22                  | 1,56 | 0,01 |
| 3                                               | 46       | 1,57 | 0,40 | 1,84                  | 1,55 | 0,01 | 434      | 1,56 | 0,38 | 1,84                  | 1,57 | 0,01 |
| 4                                               | 51       | 1,60 | 0,47 | 2,45                  | 1,55 | 0,01 | 703      | 1,59 | 0,39 | 2,45                  | 1,57 | 0,01 |
| 5                                               | 150      | 1,55 | 0,37 | 3,06                  | 1,56 | 0,01 | 1151     | 1,58 | 0,39 | 3,06                  | 1,57 | 0,01 |
| 6                                               | 177      | 1,49 | 0,40 | 3,67                  | 1,56 | 0,01 | 1772     | 1,54 | 0,37 | 3,67                  | 1,57 | 0,01 |
| 7                                               | 239      | 1,55 | 0,40 | 4,29                  | 1,56 | 0,01 | 2129     | 1,55 | 0,38 | 4,29                  | 1,57 | 0,01 |
| 8                                               | 221      | 1,57 | 0,40 | 4,90                  | 1,56 | 0,01 | 2410     | 1,56 | 0,38 | 4,90                  | 1,56 | 0,01 |
| 9                                               | 248      | 1,57 | 0,40 | 5,51                  | 1,56 | 0,01 | 2786     | 1,56 | 0,39 | 5,51                  | 1,56 | 0,01 |
| 10                                              | 298      | 1,55 | 0,39 | 6,12                  | 1,56 | 0,01 | 3235     | 1,56 | 0,38 | 6,12                  | 1,56 | 0,01 |
| 11                                              | 323      | 1,55 | 0,39 | 6,73                  | 1,56 | 0,01 | 3533     | 1,57 | 0,39 | 6,73                  | 1,56 | 0,00 |
| 12                                              | 366      | 1,56 | 0,38 | 7,35                  | 1,56 | 0,01 | 3840     | 1,56 | 0,37 | 7,35                  | 1,56 | 0,00 |
| 13                                              | 385      | 1,56 | 0,38 | 7,96                  | 1,56 | 0,01 | 4103     | 1,58 | 0,38 | 7,96                  | 1,56 | 0,00 |
| 14                                              | 346      | 1,53 | 0,38 | 8,57                  | 1,56 | 0,01 | 4305     | 1,57 | 0,38 | 8,57                  | 1,56 | 0,00 |
| 15                                              | 409      | 1,57 | 0,37 | 9,18                  | 1,55 | 0,01 | 4430     | 1,58 | 0,40 | 9,18                  | 1,56 | 0,00 |
| 16                                              | 426      | 1,55 | 0,37 | 9,80                  | 1,55 | 0,01 | 4557     | 1,58 | 0,37 | 9,80                  | 1,56 | 0,00 |
| 17                                              | 436      | 1,54 | 0,36 | 10,41                 | 1,55 | 0,01 | 4493     | 1,58 | 0,38 | 10,41                 | 1,56 | 0,00 |
| 18                                              | 443      | 1,59 | 0,38 | 11,02                 | 1,55 | 0,01 | 4543     | 1,58 | 0,39 | 11,02                 | 1,56 | 0,00 |
| 19                                              | 469      | 1,59 | 0,37 | 11,63                 | 1,55 | 0,00 | 4496     | 1,58 | 0,38 | 11,63                 | 1,57 | 0,00 |
| 20                                              | 411      | 1,58 | 0,42 | 12,24                 | 1,55 | 0,00 | 4328     | 1,59 | 0,38 | 12,24                 | 1,57 | 0,00 |
| 21                                              | 422      | 1,55 | 0,39 | 12,86                 | 1,55 | 0,01 | 4232     | 1,58 | 0,37 | 12,86                 | 1,57 | 0,00 |
| 22                                              | 370      | 1,60 | 0,36 | 13,47                 | 1,55 | 0,01 | 4008     | 1,58 | 0,38 | 13,47                 | 1,57 | 0,00 |
| 23                                              | 398      | 1,58 | 0,39 | 14,08                 | 1,55 | 0,01 | 3821     | 1,58 | 0,37 | 14,08                 | 1,57 | 0,00 |
| 24                                              | 324      | 1,61 | 0,37 | 14,69                 | 1,55 | 0,01 | 3275     | 1,60 | 0,38 | 14,69                 | 1,57 | 0,00 |
| 25                                              | 267      | 1,59 | 0,37 | 15,31                 | 1,55 | 0,01 | 2847     | 1,59 | 0,38 | 15,31                 | 1,57 | 0,00 |
| 26                                              | 236      | 1,64 | 0,36 | 15,92                 | 1,56 | 0,01 | 2293     | 1,61 | 0,38 | 15,92                 | 1,57 | 0,00 |
| 27                                              | 196      | 1,61 | 0,39 | 16,53                 | 1,56 | 0,01 | 1915     | 1,61 | 0,37 | 16,53                 | 1,57 | 0,00 |
| 28                                              | 175      | 1,62 | 0,35 | 17,14                 | 1,56 | 0,01 | 1527     | 1,60 | 0,38 | 17,14                 | 1,58 | 0,00 |
| 29                                              | 138      | 1,68 | 0,36 | 17,76                 | 1,56 | 0,01 | 1216     | 1,59 | 0,36 | 17,76                 | 1,58 | 0,00 |
| 30                                              | 78       | 1,63 | 0,35 | 18,37                 | 1,56 | 0,01 | 915      | 1,60 | 0,35 | 18,37                 | 1,58 | 0,00 |
|                                                 |          |      |      | 18,98                 | 1,57 | 0,01 |          |      |      | 18,98                 | 1,58 | 0,00 |
|                                                 |          |      |      | 19,59                 | 1,57 | 0,01 |          |      |      | 19,59                 | 1,58 | 0,00 |
|                                                 |          |      |      | 20,20                 | 1,58 | 0,01 |          |      |      | 20,20                 | 1,58 | 0,00 |
|                                                 |          |      |      | 20,82                 | 1,58 | 0,01 |          |      |      | 20,82                 | 1,58 | 0,00 |
|                                                 |          |      |      | 21,43                 | 1,58 | 0,01 |          |      |      | 21,43                 | 1,59 | 0,00 |
|                                                 |          |      |      | 22,04                 | 1,59 | 0,01 |          |      |      | 22,04                 | 1,59 | 0,00 |
|                                                 |          |      |      | 22,65                 | 1,59 | 0,01 |          |      |      | 22,65                 | 1,59 | 0,00 |
|                                                 |          |      |      | 23,27                 | 1,60 | 0,01 |          |      |      | 23,27                 | 1,59 | 0,00 |
|                                                 |          |      |      | 23,88                 | 1,60 | 0,01 |          |      |      | 23,88                 | 1,59 | 0,00 |
|                                                 |          |      |      | 24,49                 | 1,61 | 0,01 |          |      |      | 24,49                 | 1,59 | 0,00 |
|                                                 |          |      |      | 25,10                 | 1,61 | 0,01 |          |      |      | 25,10                 | 1,59 | 0,00 |
|                                                 |          |      |      | 25,71                 | 1,62 | 0,01 |          |      |      | 25,71                 | 1,60 | 0,00 |
|                                                 |          |      |      | 26,33                 | 1,62 | 0,01 |          |      |      | 26,33                 | 1,60 | 0,00 |
|                                                 |          |      |      | 26,94                 | 1,63 | 0,01 |          |      |      | 26,94                 | 1,60 | 0,00 |
|                                                 |          |      |      | 27,55                 | 1,63 | 0,01 |          |      |      | 27,55                 | 1,60 | 0,00 |
|                                                 |          |      |      | 28,16                 | 1,64 | 0,01 |          |      |      | 28,16                 | 1,60 | 0,00 |
|                                                 |          |      |      | 28,78                 | 1,64 | 0,01 |          |      |      | 28,78                 | 1,60 | 0,00 |
|                                                 |          |      |      | 29,39                 | 1,65 | 0,02 |          |      |      | 29,39                 | 1,60 | 0,00 |
|                                                 |          |      |      | 30,00                 | 1,65 | 0,02 |          |      |      | 30,00                 | 1,60 | 0,00 |

| Depression, Anxiety or Stress-related disorders |          |      |      |                       |      |      |          |      |      |                       |      |      |
|-------------------------------------------------|----------|------|------|-----------------------|------|------|----------|------|------|-----------------------|------|------|
| ApoA-I                                          |          |      |      |                       |      |      |          |      |      |                       |      |      |
| Time since index date                           | Cases    |      |      |                       |      |      | Controls |      |      |                       |      |      |
|                                                 | Observed |      |      | Predicted             |      |      | Observed |      |      | Predicted             |      |      |
|                                                 | Number   | Mean | SD   | Time since index date | Mean | SE   | Number   | Mean | SD   | Time since index date | Mean | SE   |
| 0                                               | 31       | 1,50 | 0,27 | 0,00                  | 1,52 | 0,01 | 254      | 1,43 | 0,21 | 0,00                  | 1,42 | 0,01 |
| 1                                               | 42       | 1,53 | 0,25 | 0,61                  | 1,51 | 0,01 | 365      | 1,41 | 0,22 | 0,61                  | 1,43 | 0,01 |
| 2                                               | 58       | 1,49 | 0,19 | 1,22                  | 1,50 | 0,01 | 438      | 1,44 | 0,23 | 1,22                  | 1,43 | 0,01 |
| 3                                               | 78       | 1,48 | 0,23 | 1,84                  | 1,49 | 0,01 | 595      | 1,43 | 0,22 | 1,84                  | 1,43 | 0,01 |
| 4                                               | 78       | 1,49 | 0,29 | 2,45                  | 1,48 | 0,01 | 883      | 1,43 | 0,23 | 2,45                  | 1,43 | 0,00 |
| 5                                               | 185      | 1,44 | 0,27 | 3,06                  | 1,47 | 0,01 | 1308     | 1,43 | 0,24 | 3,06                  | 1,43 | 0,00 |
| 6                                               | 180      | 1,43 | 0,24 | 3,67                  | 1,47 | 0,01 | 1869     | 1,41 | 0,22 | 3,67                  | 1,43 | 0,00 |
| 7                                               | 233      | 1,43 | 0,24 | 4,29                  | 1,46 | 0,01 | 2225     | 1,42 | 0,22 | 4,29                  | 1,43 | 0,00 |
| 8                                               | 220      | 1,42 | 0,22 | 4,90                  | 1,45 | 0,01 | 2437     | 1,42 | 0,22 | 4,90                  | 1,43 | 0,00 |
| 9                                               | 269      | 1,45 | 0,23 | 5,51                  | 1,45 | 0,01 | 2881     | 1,42 | 0,22 | 5,51                  | 1,43 | 0,00 |
| 10                                              | 318      | 1,42 | 0,25 | 6,12                  | 1,44 | 0,01 | 3377     | 1,42 | 0,22 | 6,12                  | 1,42 | 0,00 |
| 11                                              | 325      | 1,43 | 0,23 | 6,73                  | 1,44 | 0,01 | 3732     | 1,42 | 0,22 | 6,73                  | 1,42 | 0,00 |
| 12                                              | 410      | 1,41 | 0,23 | 7,35                  | 1,44 | 0,00 | 4021     | 1,42 | 0,22 | 7,35                  | 1,42 | 0,00 |
| 13                                              | 418      | 1,44 | 0,22 | 7,96                  | 1,43 | 0,00 | 4273     | 1,43 | 0,22 | 7,96                  | 1,42 | 0,00 |
| 14                                              | 404      | 1,43 | 0,24 | 8,57                  | 1,43 | 0,00 | 4537     | 1,42 | 0,22 | 8,57                  | 1,42 | 0,00 |
| 15                                              | 467      | 1,43 | 0,23 | 9,18                  | 1,43 | 0,00 | 4758     | 1,42 | 0,23 | 9,18                  | 1,42 | 0,00 |
| 16                                              | 497      | 1,43 | 0,23 | 9,80                  | 1,43 | 0,00 | 4899     | 1,42 | 0,22 | 9,80                  | 1,42 | 0,00 |
| 17                                              | 497      | 1,41 | 0,21 | 10,41                 | 1,43 | 0,00 | 4821     | 1,43 | 0,22 | 10,41                 | 1,42 | 0,00 |
| 18                                              | 478      | 1,42 | 0,22 | 11,02                 | 1,42 | 0,00 | 4853     | 1,42 | 0,22 | 11,02                 | 1,42 | 0,00 |
| 19                                              | 516      | 1,43 | 0,22 | 11,63                 | 1,42 | 0,00 | 4882     | 1,42 | 0,22 | 11,63                 | 1,42 | 0,00 |
| 20                                              | 480      | 1,43 | 0,25 | 12,24                 | 1,42 | 0,00 | 4691     | 1,43 | 0,22 | 12,24                 | 1,42 | 0,00 |
| 21                                              | 496      | 1,44 | 0,24 | 12,86                 | 1,42 | 0,00 | 4550     | 1,42 | 0,22 | 12,86                 | 1,42 | 0,00 |
| 22                                              | 442      | 1,43 | 0,22 | 13,47                 | 1,42 | 0,00 | 4297     | 1,42 | 0,22 | 13,47                 | 1,42 | 0,00 |
| 23                                              | 463      | 1,42 | 0,23 | 14,08                 | 1,42 | 0,00 | 4176     | 1,42 | 0,21 | 14,08                 | 1,42 | 0,00 |
| 24                                              | 383      | 1,43 | 0,23 | 14,69                 | 1,42 | 0,00 | 3641     | 1,42 | 0,22 | 14,69                 | 1,42 | 0,00 |
| 25                                              | 304      | 1,44 | 0,22 | 15,31                 | 1,42 | 0,00 | 3258     | 1,42 | 0,22 | 15,31                 | 1,42 | 0,00 |
| 26                                              | 294      | 1,44 | 0,22 | 15,92                 | 1,42 | 0,00 | 2747     | 1,43 | 0,22 | 15,92                 | 1,42 | 0,00 |
| 27                                              | 255      | 1,44 | 0,23 | 16,53                 | 1,42 | 0,00 | 2321     | 1,43 | 0,22 | 16,53                 | 1,42 | 0,00 |
| 28                                              | 214      | 1,43 | 0,21 | 17,14                 | 1,43 | 0,00 | 1859     | 1,41 | 0,23 | 17,14                 | 1,42 | 0,00 |
| 29                                              | 167      | 1,44 | 0,22 | 17,76                 | 1,43 | 0,00 | 1441     | 1,41 | 0,22 | 17,76                 | 1,42 | 0,00 |
| 30                                              | 99       | 1,41 | 0,24 | 18,37                 | 1,43 | 0,00 | 1076     | 1,42 | 0,20 | 18,37                 | 1,42 | 0,00 |
|                                                 |          |      |      | 18,98                 | 1,43 | 0,00 |          |      |      | 18,98                 | 1,42 | 0,00 |
|                                                 |          |      |      | 19,59                 | 1,43 | 0,00 |          |      |      | 19,59                 | 1,42 | 0,00 |
|                                                 |          |      |      | 20,20                 | 1,43 | 0,00 |          |      |      | 20,20                 | 1,42 | 0,00 |
|                                                 |          |      |      | 20,82                 | 1,43 | 0,00 |          |      |      | 20,82                 | 1,42 | 0,00 |
|                                                 |          |      |      | 21,43                 | 1,43 | 0,00 |          |      |      | 21,43                 | 1,42 | 0,00 |
|                                                 |          |      |      | 22,04                 | 1,43 | 0,00 |          |      |      | 22,04                 | 1,42 | 0,00 |
|                                                 |          |      |      | 22,65                 | 1,44 | 0,00 |          |      |      | 22,65                 | 1,42 | 0,00 |
|                                                 |          |      |      | 23,27                 | 1,44 | 0,00 |          |      |      | 23,27                 | 1,42 | 0,00 |
|                                                 |          |      |      | 23,88                 | 1,44 | 0,00 |          |      |      | 23,88                 | 1,42 | 0,00 |
|                                                 |          |      |      | 24,49                 | 1,44 | 0,00 |          |      |      | 24,49                 | 1,42 | 0,00 |
|                                                 |          |      |      | 25,10                 | 1,44 | 0,00 |          |      |      | 25,10                 | 1,42 | 0,00 |
|                                                 |          |      |      | 25,71                 | 1,44 | 0,00 |          |      |      | 25,71                 | 1,42 | 0,00 |
|                                                 |          |      |      | 26,33                 | 1,44 | 0,00 |          |      |      | 26,33                 | 1,42 | 0,00 |
|                                                 |          |      |      | 26,94                 | 1,44 | 0,00 |          |      |      | 26,94                 | 1,42 | 0,00 |
|                                                 |          |      |      | 27,55                 | 1,44 | 0,00 |          |      |      | 27,55                 | 1,42 | 0,00 |
|                                                 |          |      |      | 28,16                 | 1,43 | 0,00 |          |      |      | 28,16                 | 1,42 | 0,00 |
|                                                 |          |      |      | 28,78                 | 1,43 | 0,00 |          |      |      | 28,78                 | 1,42 | 0,00 |
|                                                 |          |      |      | 29,39                 | 1,43 | 0,00 |          |      |      | 29,39                 | 1,42 | 0,00 |
|                                                 |          |      |      | 30,00                 | 1,43 | 0,01 |          |      |      | 30,00                 | 1,42 | 0,00 |

| Depression, Anxiety or Stress-related disorders |          |      |      |                       |      |      |          |      |      |                       |      |      |
|-------------------------------------------------|----------|------|------|-----------------------|------|------|----------|------|------|-----------------------|------|------|
| ApoB                                            |          |      |      |                       |      |      |          |      |      |                       |      |      |
|                                                 | Cases    |      |      |                       |      |      | Controls |      |      |                       |      |      |
|                                                 | Observed |      |      | Predicted             |      |      | Observed |      |      | Predicted             |      |      |
| Time since index date                           | Number   | Mean | SD   | Time since index date | Mean | SE   | Number   | Mean | SD   | Time since index date | Mean | SE   |
| 0                                               | 33       | 1,42 | 0,40 | 0,00                  | 1,44 | 0,02 | 268      | 1,18 | 0,32 | 0,00                  | 1,20 | 0,01 |
| 1                                               | 42       | 1,35 | 0,42 | 0,61                  | 1,41 | 0,02 | 366      | 1,21 | 0,34 | 0,61                  | 1,20 | 0,00 |
| 2                                               | 56       | 1,40 | 0,36 | 1,22                  | 1,38 | 0,02 | 452      | 1,20 | 0,38 | 1,22                  | 1,19 | 0,00 |
| 3                                               | 73       | 1,33 | 0,42 | 1,84                  | 1,35 | 0,01 | 601      | 1,21 | 0,36 | 1,84                  | 1,19 | 0,00 |
| 4                                               | 72       | 1,34 | 0,38 | 2,45                  | 1,33 | 0,01 | 843      | 1,19 | 0,35 | 2,45                  | 1,19 | 0,00 |
| 5                                               | 184      | 1,23 | 0,38 | 3,06                  | 1,31 | 0,01 | 1228     | 1,17 | 0,35 | 3,06                  | 1,19 | 0,00 |
| 6                                               | 162      | 1,18 | 0,36 | 3,67                  | 1,29 | 0,01 | 1775     | 1,17 | 0,35 | 3,67                  | 1,19 | 0,00 |
| 7                                               | 214      | 1,19 | 0,37 | 4,29                  | 1,28 | 0,01 | 2162     | 1,18 | 0,38 | 4,29                  | 1,18 | 0,00 |
| 8                                               | 198      | 1,21 | 0,41 | 4,90                  | 1,26 | 0,01 | 2346     | 1,17 | 0,38 | 4,90                  | 1,18 | 0,00 |
| 9                                               | 264      | 1,19 | 0,36 | 5,51                  | 1,25 | 0,01 | 2872     | 1,16 | 0,36 | 5,51                  | 1,18 | 0,00 |
| 10                                              | 298      | 1,19 | 0,37 | 6,12                  | 1,24 | 0,01 | 3263     | 1,16 | 0,36 | 6,12                  | 1,18 | 0,00 |
| 11                                              | 311      | 1,22 | 0,38 | 6,73                  | 1,23 | 0,01 | 3513     | 1,16 | 0,36 | 6,73                  | 1,18 | 0,00 |
| 12                                              | 358      | 1,18 | 0,36 | 7,35                  | 1,22 | 0,01 | 3768     | 1,17 | 0,36 | 7,35                  | 1,17 | 0,00 |
| 13                                              | 384      | 1,20 | 0,36 | 7,96                  | 1,21 | 0,01 | 3992     | 1,17 | 0,35 | 7,96                  | 1,17 | 0,00 |
| 14                                              | 398      | 1,22 | 0,40 | 8,57                  | 1,20 | 0,01 | 4233     | 1,18 | 0,36 | 8,57                  | 1,17 | 0,00 |
| 15                                              | 411      | 1,21 | 0,36 | 9,18                  | 1,20 | 0,01 | 4247     | 1,19 | 0,36 | 9,18                  | 1,17 | 0,00 |
| 16                                              | 451      | 1,19 | 0,37 | 9,80                  | 1,19 | 0,01 | 4338     | 1,19 | 0,36 | 9,80                  | 1,17 | 0,00 |
| 17                                              | 467      | 1,18 | 0,35 | 10,41                 | 1,19 | 0,01 | 4355     | 1,18 | 0,36 | 10,41                 | 1,17 | 0,00 |
| 18                                              | 430      | 1,17 | 0,36 | 11,02                 | 1,19 | 0,01 | 4496     | 1,18 | 0,35 | 11,02                 | 1,17 | 0,00 |
| 19                                              | 470      | 1,18 | 0,36 | 11,63                 | 1,19 | 0,01 | 4421     | 1,19 | 0,35 | 11,63                 | 1,17 | 0,00 |
| 20                                              | 445      | 1,19 | 0,34 | 12,24                 | 1,19 | 0,01 | 4285     | 1,19 | 0,35 | 12,24                 | 1,17 | 0,00 |
| 21                                              | 462      | 1,17 | 0,35 | 12,86                 | 1,18 | 0,00 | 4132     | 1,19 | 0,35 | 12,86                 | 1,17 | 0,00 |
| 22                                              | 388      | 1,19 | 0,37 | 13,47                 | 1,18 | 0,00 | 3891     | 1,19 | 0,35 | 13,47                 | 1,17 | 0,00 |
| 23                                              | 396      | 1,20 | 0,34 | 14,08                 | 1,18 | 0,00 | 3662     | 1,21 | 0,36 | 14,08                 | 1,17 | 0,00 |
| 24                                              | 351      | 1,22 | 0,36 | 14,69                 | 1,18 | 0,00 | 3221     | 1,20 | 0,36 | 14,69                 | 1,17 | 0,00 |
| 25                                              | 273      | 1,22 | 0,35 | 15,31                 | 1,18 | 0,00 | 2840     | 1,22 | 0,36 | 15,31                 | 1,17 | 0,00 |
| 26                                              | 244      | 1,19 | 0,32 | 15,92                 | 1,19 | 0,00 | 2334     | 1,24 | 0,36 | 15,92                 | 1,18 | 0,00 |
| 27                                              | 215      | 1,26 | 0,36 | 16,53                 | 1,19 | 0,00 | 1870     | 1,24 | 0,33 | 16,53                 | 1,18 | 0,00 |
| 28                                              | 166      | 1,23 | 0,32 | 17,14                 | 1,19 | 0,00 | 1371     | 1,27 | 0,35 | 17,14                 | 1,18 | 0,00 |
| 29                                              | 107      | 1,21 | 0,30 | 17,76                 | 1,19 | 0,00 | 1058     | 1,26 | 0,32 | 17,76                 | 1,18 | 0,00 |
| 30                                              | 73       | 1,18 | 0,29 | 18,37                 | 1,19 | 0,00 | 795      | 1,26 | 0,31 | 18,37                 | 1,19 | 0,00 |
|                                                 |          |      |      | 18,98                 | 1,19 | 0,00 |          |      |      | 18,98                 | 1,19 | 0,00 |
|                                                 |          |      |      | 19,59                 | 1,19 | 0,00 |          |      |      | 19,59                 | 1,19 | 0,00 |
|                                                 |          |      |      | 20,20                 | 1,20 | 0,00 |          |      |      | 20,20                 | 1,19 | 0,00 |
|                                                 |          |      |      | 20,82                 | 1,20 | 0,00 |          |      |      | 20,82                 | 1,20 | 0,00 |
|                                                 |          |      |      | 21,43                 | 1,20 | 0,00 |          |      |      | 21,43                 | 1,20 | 0,00 |
|                                                 |          |      |      | 22,04                 | 1,20 | 0,01 |          |      |      | 22,04                 | 1,20 | 0,00 |
|                                                 |          |      |      | 22,65                 | 1,20 | 0,01 |          |      |      | 22,65                 | 1,21 | 0,00 |
|                                                 |          |      |      | 23,27                 | 1,21 | 0,01 |          |      |      | 23,27                 | 1,21 | 0,00 |
|                                                 |          |      |      | 23,88                 | 1,21 | 0,01 |          |      |      | 23,88                 | 1,22 | 0,00 |
|                                                 |          |      |      | 24,49                 | 1,21 | 0,01 |          |      |      | 24,49                 | 1,22 | 0,00 |
|                                                 |          |      |      | 25,10                 | 1,21 | 0,01 |          |      |      | 25,10                 | 1,23 | 0,00 |
|                                                 |          |      |      | 25,71                 | 1,21 | 0,01 |          |      |      | 25,71                 | 1,23 | 0,00 |
|                                                 |          |      |      | 26,33                 | 1,21 | 0,01 |          |      |      | 26,33                 | 1,23 | 0,00 |
|                                                 |          |      |      | 26,94                 | 1,21 | 0,01 |          |      |      | 26,94                 | 1,24 | 0,00 |
|                                                 |          |      |      | 27,55                 | 1,21 | 0,01 |          |      |      | 27,55                 | 1,24 | 0,00 |
|                                                 |          |      |      | 28,16                 | 1,21 | 0,01 |          |      |      | 28,16                 | 1,25 | 0,00 |
|                                                 |          |      |      | 28,78                 | 1,21 | 0,01 |          |      |      | 28,78                 | 1,25 | 0,00 |
|                                                 |          |      |      | 29,39                 | 1,21 | 0,02 |          |      |      | 29,39                 | 1,26 | 0,01 |
|                                                 |          |      |      | 30,00                 | 1,21 | 0,02 |          |      |      | 30,00                 | 1,27 | 0,01 |



| Depression, Anxiety or Stress-related disorders |          |      |      |                       |      |      |          |      |      |                       |      |      |
|-------------------------------------------------|----------|------|------|-----------------------|------|------|----------|------|------|-----------------------|------|------|
| Log2 LDL-C/HDL-C ratio                          |          |      |      |                       |      |      |          |      |      |                       |      |      |
|                                                 | Cases    |      |      |                       |      |      | Controls |      |      |                       |      |      |
|                                                 | Observed |      |      | Predicted             |      |      | Observed |      |      | Predicted             |      |      |
| Time since index date                           | Number   | Mean | SD   | Time since index date | Mean | SE   | Number   | Mean | SD   | Time since index date | Mean | SE   |
| 0                                               | 36       | 1,41 | 0,60 | 0,00                  | 1,34 | 0,02 | 273      | 1,26 | 0,56 | 0,00                  | 1,27 | 0,02 |
| 1                                               | 48       | 1,20 | 0,57 | 0,61                  | 1,32 | 0,02 | 398      | 1,28 | 0,58 | 0,61                  | 1,26 | 0,01 |
| 2                                               | 59       | 1,27 | 0,55 | 1,22                  | 1,30 | 0,01 | 465      | 1,22 | 0,62 | 1,22                  | 1,24 | 0,01 |
| 3                                               | 73       | 1,28 | 0,66 | 1,84                  | 1,28 | 0,01 | 589      | 1,22 | 0,62 | 1,84                  | 1,23 | 0,01 |
| 4                                               | 85       | 1,26 | 0,65 | 2,45                  | 1,27 | 0,01 | 902      | 1,18 | 0,60 | 2,45                  | 1,22 | 0,01 |
| 5                                               | 175      | 1,23 | 0,61 | 3,06                  | 1,26 | 0,01 | 1377     | 1,16 | 0,60 | 3,06                  | 1,22 | 0,01 |
| 6                                               | 199      | 1,22 | 0,57 | 3,67                  | 1,25 | 0,01 | 2043     | 1,18 | 0,59 | 3,67                  | 1,21 | 0,01 |
| 7                                               | 274      | 1,21 | 0,63 | 4,29                  | 1,24 | 0,01 | 2464     | 1,22 | 0,61 | 4,29                  | 1,20 | 0,01 |
| 8                                               | 250      | 1,23 | 0,63 | 4,90                  | 1,23 | 0,01 | 2693     | 1,19 | 0,60 | 4,90                  | 1,20 | 0,01 |
| 9                                               | 314      | 1,16 | 0,64 | 5,51                  | 1,23 | 0,01 | 3144     | 1,19 | 0,59 | 5,51                  | 1,19 | 0,01 |
| 10                                              | 350      | 1,22 | 0,61 | 6,12                  | 1,22 | 0,01 | 3671     | 1,18 | 0,60 | 6,12                  | 1,19 | 0,01 |
| 11                                              | 364      | 1,20 | 0,59 | 6,73                  | 1,22 | 0,01 | 4055     | 1,16 | 0,60 | 6,73                  | 1,18 | 0,01 |
| 12                                              | 456      | 1,22 | 0,62 | 7,35                  | 1,21 | 0,01 | 4346     | 1,18 | 0,60 | 7,35                  | 1,18 | 0,01 |
| 13                                              | 456      | 1,23 | 0,59 | 7,96                  | 1,21 | 0,01 | 4638     | 1,14 | 0,61 | 7,96                  | 1,18 | 0,01 |
| 14                                              | 427      | 1,18 | 0,61 | 8,57                  | 1,21 | 0,01 | 4794     | 1,16 | 0,61 | 8,57                  | 1,18 | 0,00 |
| 15                                              | 497      | 1,17 | 0,62 | 9,18                  | 1,21 | 0,01 | 4972     | 1,15 | 0,63 | 9,18                  | 1,17 | 0,00 |
| 16                                              | 517      | 1,19 | 0,60 | 9,80                  | 1,20 | 0,01 | 5107     | 1,16 | 0,61 | 9,80                  | 1,17 | 0,00 |
| 17                                              | 514      | 1,20 | 0,60 | 10,41                 | 1,20 | 0,01 | 5049     | 1,15 | 0,61 | 10,41                 | 1,17 | 0,00 |
| 18                                              | 514      | 1,11 | 0,63 | 11,02                 | 1,20 | 0,01 | 5093     | 1,15 | 0,60 | 11,02                 | 1,17 | 0,00 |
| 19                                              | 517      | 1,10 | 0,60 | 11,63                 | 1,20 | 0,01 | 5149     | 1,15 | 0,61 | 11,63                 | 1,17 | 0,00 |
| 20                                              | 483      | 1,15 | 0,65 | 12,24                 | 1,19 | 0,01 | 4837     | 1,14 | 0,60 | 12,24                 | 1,17 | 0,00 |
| 21                                              | 497      | 1,14 | 0,64 | 12,86                 | 1,19 | 0,01 | 4772     | 1,15 | 0,60 | 12,86                 | 1,16 | 0,00 |
| 22                                              | 460      | 1,12 | 0,59 | 13,47                 | 1,19 | 0,01 | 4605     | 1,15 | 0,61 | 13,47                 | 1,16 | 0,00 |
| 23                                              | 481      | 1,10 | 0,58 | 14,08                 | 1,19 | 0,01 | 4422     | 1,15 | 0,62 | 14,08                 | 1,16 | 0,00 |
| 24                                              | 406      | 1,14 | 0,59 | 14,69                 | 1,18 | 0,01 | 3817     | 1,13 | 0,61 | 14,69                 | 1,16 | 0,00 |
| 25                                              | 305      | 1,11 | 0,59 | 15,31                 | 1,18 | 0,01 | 3309     | 1,14 | 0,61 | 15,31                 | 1,16 | 0,00 |
| 26                                              | 283      | 1,02 | 0,57 | 15,92                 | 1,18 | 0,01 | 2690     | 1,10 | 0,62 | 15,92                 | 1,16 | 0,00 |
| 27                                              | 239      | 1,10 | 0,61 | 16,53                 | 1,17 | 0,01 | 2223     | 1,11 | 0,60 | 16,53                 | 1,16 | 0,00 |
| 28                                              | 206      | 1,07 | 0,55 | 17,14                 | 1,17 | 0,01 | 1771     | 1,13 | 0,61 | 17,14                 | 1,16 | 0,00 |
| 29                                              | 162      | 1,04 | 0,61 | 17,76                 | 1,16 | 0,01 | 1377     | 1,11 | 0,61 | 17,76                 | 1,15 | 0,00 |
| 30                                              | 91       | 0,98 | 0,65 | 18,37                 | 1,16 | 0,01 | 1039     | 1,08 | 0,58 | 18,37                 | 1,15 | 0,00 |
|                                                 |          |      |      | 18,98                 | 1,15 | 0,01 |          |      |      | 18,98                 | 1,15 | 0,00 |
|                                                 |          |      |      | 19,59                 | 1,15 | 0,01 |          |      |      | 19,59                 | 1,15 | 0,00 |
|                                                 |          |      |      | 20,20                 | 1,14 | 0,01 |          |      |      | 20,20                 | 1,15 | 0,00 |
|                                                 |          |      |      | 20,82                 | 1,14 | 0,01 |          |      |      | 20,82                 | 1,15 | 0,00 |
|                                                 |          |      |      | 21,43                 | 1,13 | 0,01 |          |      |      | 21,43                 | 1,14 | 0,00 |
|                                                 |          |      |      | 22,04                 | 1,13 | 0,01 |          |      |      | 22,04                 | 1,14 | 0,00 |
|                                                 |          |      |      | 22,65                 | 1,12 | 0,01 |          |      |      | 22,65                 | 1,14 | 0,00 |
|                                                 |          |      |      | 23,27                 | 1,11 | 0,01 |          |      |      | 23,27                 | 1,14 | 0,00 |
|                                                 |          |      |      | 23,88                 | 1,11 | 0,01 |          |      |      | 23,88                 | 1,13 | 0,00 |
|                                                 |          |      |      | 24,49                 | 1,10 | 0,01 |          |      |      | 24,49                 | 1,13 | 0,00 |
|                                                 |          |      |      | 25,10                 | 1,09 | 0,01 |          |      |      | 25,10                 | 1,13 | 0,00 |
|                                                 |          |      |      | 25,71                 | 1,08 | 0,01 |          |      |      | 25,71                 | 1,13 | 0,01 |
|                                                 |          |      |      | 26,33                 | 1,07 | 0,01 |          |      |      | 26,33                 | 1,12 | 0,01 |
|                                                 |          |      |      | 26,94                 | 1,06 | 0,01 |          |      |      | 26,94                 | 1,12 | 0,01 |
|                                                 |          |      |      | 27,55                 | 1,05 | 0,02 |          |      |      | 27,55                 | 1,11 | 0,01 |
|                                                 |          |      |      | 28,16                 | 1,04 | 0,02 |          |      |      | 28,16                 | 1,11 | 0,01 |
|                                                 |          |      |      | 28,78                 | 1,03 | 0,02 |          |      |      | 28,78                 | 1,10 | 0,01 |
|                                                 |          |      |      | 29,39                 | 1,02 | 0,02 |          |      |      | 29,39                 | 1,10 | 0,01 |
|                                                 |          |      |      | 30,00                 | 1,01 | 0,03 |          |      |      | 30,00                 | 1,09 | 0,01 |

| Depression, Anxiety or Stress-related disorders |          |       |      |                       |       |      |          |       |      |                       |       |      |
|-------------------------------------------------|----------|-------|------|-----------------------|-------|------|----------|-------|------|-----------------------|-------|------|
| Log2 ApoB/ApoA-I ratio                          |          |       |      |                       |       |      |          |       |      |                       |       |      |
|                                                 | Cases    |       |      |                       |       |      | Controls |       |      |                       |       |      |
|                                                 | Observed |       |      | Predicted             |       |      | Observed |       |      | Predicted             |       |      |
| Time since index date                           | Number   | Mean  | SD   | Time since index date | Mean  | SE   | Number   | Mean  | SD   | Time since index date | Mean  | SE   |
| 0                                               | 78       | -0,22 | 0,24 | 0,00                  | -0,23 | 0,02 | 1014     | -0,37 | 0,45 | 0,00                  | -0,33 | 0,02 |
| 1                                               | 110      | -0,26 | 0,34 | 0,61                  | -0,26 | 0,02 | 1106     | -0,30 | 0,47 | 0,61                  | -0,33 | 0,01 |
| 2                                               | 92       | -0,31 | 0,37 | 1,22                  | -0,28 | 0,01 | 1411     | -0,33 | 0,50 | 1,22                  | -0,33 | 0,01 |
| 3                                               | 168      | -0,38 | 0,49 | 1,84                  | -0,30 | 0,01 | 1644     | -0,31 | 0,53 | 1,84                  | -0,33 | 0,01 |
| 4                                               | 138      | -0,32 | 0,53 | 2,45                  | -0,32 | 0,01 | 2002     | -0,35 | 0,46 | 2,45                  | -0,33 | 0,01 |
| 5                                               | 333      | -0,36 | 0,43 | 3,06                  | -0,33 | 0,01 | 2773     | -0,36 | 0,48 | 3,06                  | -0,33 | 0,01 |
| 6                                               | 352      | -0,34 | 0,48 | 3,67                  | -0,34 | 0,01 | 3829     | -0,33 | 0,48 | 3,67                  | -0,34 | 0,01 |
| 7                                               | 456      | -0,33 | 0,46 | 4,29                  | -0,35 | 0,01 | 4411     | -0,32 | 0,51 | 4,29                  | -0,34 | 0,01 |
| 8                                               | 403      | -0,38 | 0,48 | 4,90                  | -0,35 | 0,02 | 4853     | -0,36 | 0,49 | 4,90                  | -0,34 | 0,01 |
| 9                                               | 526      | -0,43 | 0,58 | 5,51                  | -0,36 | 0,02 | 5992     | -0,37 | 0,48 | 5,51                  | -0,34 | 0,01 |
| 10                                              | 527      | -0,29 | 0,49 | 6,12                  | -0,36 | 0,02 | 6812     | -0,40 | 0,49 | 6,12                  | -0,34 | 0,01 |
| 11                                              | 506      | -0,28 | 0,50 | 6,73                  | -0,36 | 0,02 | 7161     | -0,36 | 0,49 | 6,73                  | -0,35 | 0,01 |
| 12                                              | 562      | -0,35 | 0,45 | 7,35                  | -0,36 | 0,02 | 7744     | -0,35 | 0,48 | 7,35                  | -0,35 | 0,01 |
| 13                                              | 694      | -0,31 | 0,48 | 7,96                  | -0,35 | 0,02 | 8228     | -0,35 | 0,48 | 7,96                  | -0,35 | 0,01 |
| 14                                              | 776      | -0,26 | 0,49 | 8,57                  | -0,35 | 0,02 | 8681     | -0,36 | 0,49 | 8,57                  | -0,35 | 0,01 |
| 15                                              | 792      | -0,29 | 0,54 | 9,18                  | -0,35 | 0,02 | 8827     | -0,35 | 0,49 | 9,18                  | -0,35 | 0,01 |
| 16                                              | 861      | -0,28 | 0,53 | 9,80                  | -0,34 | 0,02 | 8899     | -0,32 | 0,49 | 9,80                  | -0,35 | 0,01 |
| 17                                              | 927      | -0,29 | 0,48 | 10,41                 | -0,34 | 0,02 | 8907     | -0,33 | 0,49 | 10,41                 | -0,36 | 0,01 |
| 18                                              | 926      | -0,25 | 0,51 | 11,02                 | -0,33 | 0,02 | 8973     | -0,34 | 0,48 | 11,02                 | -0,36 | 0,01 |
| 19                                              | 966      | -0,35 | 0,47 | 11,63                 | -0,33 | 0,01 | 8769     | -0,33 | 0,48 | 11,63                 | -0,36 | 0,01 |
| 20                                              | 861      | -0,31 | 0,53 | 12,24                 | -0,32 | 0,01 | 8745     | -0,34 | 0,47 | 12,24                 | -0,36 | 0,00 |
| 21                                              | 894      | -0,34 | 0,49 | 12,86                 | -0,32 | 0,01 | 8159     | -0,31 | 0,48 | 12,86                 | -0,36 | 0,00 |
| 22                                              | 717      | -0,29 | 0,46 | 13,47                 | -0,31 | 0,01 | 7954     | -0,30 | 0,48 | 13,47                 | -0,35 | 0,00 |
| 23                                              | 789      | -0,25 | 0,48 | 14,08                 | -0,31 | 0,01 | 7540     | -0,30 | 0,47 | 14,08                 | -0,35 | 0,00 |
| 24                                              | 637      | -0,31 | 0,48 | 14,69                 | -0,30 | 0,01 | 6319     | -0,30 | 0,49 | 14,69                 | -0,35 | 0,00 |
| 25                                              | 577      | -0,24 | 0,48 | 15,31                 | -0,30 | 0,01 | 5826     | -0,27 | 0,47 | 15,31                 | -0,35 | 0,00 |
| 26                                              | 485      | -0,35 | 0,43 | 15,92                 | -0,29 | 0,01 | 4676     | -0,28 | 0,48 | 15,92                 | -0,35 | 0,00 |
| 27                                              | 389      | -0,20 | 0,50 | 16,53                 | -0,29 | 0,01 | 3748     | -0,26 | 0,46 | 16,53                 | -0,35 | 0,00 |
| 28                                              | 296      | -0,33 | 0,45 | 17,14                 | -0,29 | 0,01 | 2676     | -0,22 | 0,45 | 17,14                 | -0,34 | 0,00 |
| 29                                              | 190      | -0,34 | 0,41 | 17,76                 | -0,29 | 0,01 | 1978     | -0,21 | 0,44 | 17,76                 | -0,34 | 0,00 |
| 30                                              | 145      | -0,35 | 0,37 | 18,37                 | -0,29 | 0,01 | 1485     | -0,19 | 0,40 | 18,37                 | -0,34 | 0,00 |
|                                                 |          |       |      | 18,98                 | -0,28 | 0,01 |          |       |      | 18,98                 | -0,33 | 0,00 |
|                                                 |          |       |      | 19,59                 | -0,28 | 0,01 |          |       |      | 19,59                 | -0,33 | 0,00 |
|                                                 |          |       |      | 20,20                 | -0,28 | 0,01 |          |       |      | 20,20                 | -0,32 | 0,00 |
|                                                 |          |       |      | 20,82                 | -0,28 | 0,01 |          |       |      | 20,82                 | -0,32 | 0,00 |
|                                                 |          |       |      | 21,43                 | -0,28 | 0,01 |          |       |      | 21,43                 | -0,31 | 0,00 |
|                                                 |          |       |      | 22,04                 | -0,28 | 0,01 |          |       |      | 22,04                 | -0,31 | 0,00 |
|                                                 |          |       |      | 22,65                 | -0,29 | 0,02 |          |       |      | 22,65                 | -0,30 | 0,00 |
|                                                 |          |       |      | 23,27                 | -0,29 | 0,02 |          |       |      | 23,27                 | -0,30 | 0,00 |
|                                                 |          |       |      | 23,88                 | -0,29 | 0,02 |          |       |      | 23,88                 | -0,29 | 0,00 |
|                                                 |          |       |      | 24,49                 | -0,29 | 0,02 |          |       |      | 24,49                 | -0,28 | 0,00 |
|                                                 |          |       |      | 25,10                 | -0,29 | 0,02 |          |       |      | 25,10                 | -0,28 | 0,00 |
|                                                 |          |       |      | 25,71                 | -0,30 | 0,02 |          |       |      | 25,71                 | -0,27 | 0,00 |
|                                                 |          |       |      | 26,33                 | -0,30 | 0,03 |          |       |      | 26,33                 | -0,26 | 0,00 |
|                                                 |          |       |      | 26,94                 | -0,30 | 0,03 |          |       |      | 26,94                 | -0,25 | 0,00 |
|                                                 |          |       |      | 27,55                 | -0,31 | 0,03 |          |       |      | 27,55                 | -0,24 | 0,00 |
|                                                 |          |       |      | 28,16                 | -0,31 | 0,03 |          |       |      | 28,16                 | -0,23 | 0,00 |
|                                                 |          |       |      | 28,78                 | -0,32 | 0,03 |          |       |      | 28,78                 | -0,22 | 0,00 |
|                                                 |          |       |      | 29,39                 | -0,33 | 0,04 |          |       |      | 29,39                 | -0,20 | 0,01 |
|                                                 |          |       |      | 30,00                 | -0,33 | 0,06 |          |       |      | 30,00                 | -0,19 | 0,01 |

| Depression            |          |      |      |                       |      |      |          |      |      |                       |      |      |
|-----------------------|----------|------|------|-----------------------|------|------|----------|------|------|-----------------------|------|------|
| Glucose               |          |      |      |                       |      |      |          |      |      |                       |      |      |
|                       | Cases    |      |      |                       |      |      | Controls |      |      |                       |      |      |
|                       | Observed |      |      | Predicted             |      |      | Observed |      |      | Predicted             |      |      |
| Time since index date | Number   | Mean | SD   | Time since index date | Mean | SE   | Number   | Mean | SD   | Time since index date | Mean | SE   |
| 0                     | 42       | 5,47 | 2,26 | 0,00                  | 5,74 | 0,05 | 486      | 5,22 | 1,35 | 0,00                  | 5,21 | 0,05 |
| 1                     | 84       | 6,10 | 2,74 | 0,61                  | 5,71 | 0,05 | 576      | 5,23 | 1,25 | 0,61                  | 5,19 | 0,04 |
| 2                     | 97       | 5,69 | 2,30 | 1,22                  | 5,68 | 0,05 | 855      | 5,07 | 1,17 | 1,22                  | 5,18 | 0,03 |
| 3                     | 115      | 5,44 | 1,51 | 1,84                  | 5,65 | 0,05 | 1028     | 5,14 | 1,36 | 1,84                  | 5,16 | 0,02 |
| 4                     | 140      | 5,43 | 1,50 | 2,45                  | 5,61 | 0,05 | 1571     | 5,11 | 1,35 | 2,45                  | 5,14 | 0,02 |
| 5                     | 331      | 5,55 | 2,20 | 3,06                  | 5,57 | 0,05 | 2366     | 5,06 | 1,22 | 3,06                  | 5,13 | 0,02 |
| 6                     | 348      | 5,32 | 1,68 | 3,67                  | 5,54 | 0,05 | 3344     | 5,04 | 1,21 | 3,67                  | 5,11 | 0,02 |
| 7                     | 447      | 5,30 | 1,65 | 4,29                  | 5,50 | 0,05 | 4017     | 5,07 | 1,26 | 4,29                  | 5,10 | 0,02 |
| 8                     | 481      | 5,30 | 1,79 | 4,90                  | 5,46 | 0,05 | 4382     | 5,04 | 1,14 | 4,90                  | 5,09 | 0,01 |
| 9                     | 513      | 5,28 | 1,46 | 5,51                  | 5,42 | 0,05 | 5123     | 5,05 | 1,24 | 5,51                  | 5,07 | 0,01 |
| 10                    | 605      | 5,16 | 1,52 | 6,12                  | 5,38 | 0,04 | 5790     | 4,99 | 1,10 | 6,12                  | 5,06 | 0,01 |
| 11                    | 643      | 5,05 | 1,24 | 6,73                  | 5,35 | 0,04 | 6600     | 4,97 | 1,03 | 6,73                  | 5,05 | 0,01 |
| 12                    | 746      | 5,10 | 1,61 | 7,35                  | 5,31 | 0,03 | 7282     | 4,94 | 1,00 | 7,35                  | 5,03 | 0,01 |
| 13                    | 832      | 5,11 | 1,37 | 7,96                  | 5,28 | 0,03 | 7930     | 4,93 | 0,90 | 7,96                  | 5,02 | 0,01 |
| 14                    | 873      | 5,03 | 1,33 | 8,57                  | 5,24 | 0,02 | 8451     | 4,93 | 1,06 | 8,57                  | 5,01 | 0,01 |
| 15                    | 942      | 5,00 | 1,20 | 9,18                  | 5,21 | 0,02 | 8903     | 4,90 | 1,06 | 9,18                  | 5,00 | 0,01 |
| 16                    | 948      | 5,04 | 1,60 | 9,80                  | 5,18 | 0,02 | 9378     | 4,89 | 1,01 | 9,80                  | 4,99 | 0,01 |
| 17                    | 1001     | 4,95 | 1,11 | 10,41                 | 5,16 | 0,02 | 9223     | 4,87 | 0,98 | 10,41                 | 4,98 | 0,01 |
| 18                    | 995      | 5,00 | 1,14 | 11,02                 | 5,13 | 0,02 | 9513     | 4,88 | 0,99 | 11,02                 | 4,97 | 0,01 |
| 19                    | 1028     | 4,95 | 1,27 | 11,63                 | 5,11 | 0,02 | 9507     | 4,86 | 0,93 | 11,63                 | 4,96 | 0,00 |
| 20                    | 976      | 4,95 | 1,19 | 12,24                 | 5,09 | 0,02 | 9224     | 4,87 | 0,92 | 12,24                 | 4,95 | 0,00 |
| 21                    | 921      | 5,00 | 1,16 | 12,86                 | 5,07 | 0,02 | 8899     | 4,87 | 0,93 | 12,86                 | 4,94 | 0,00 |
| 22                    | 842      | 5,00 | 1,21 | 13,47                 | 5,06 | 0,01 | 8510     | 4,89 | 1,04 | 13,47                 | 4,93 | 0,00 |
| 23                    | 904      | 4,92 | 0,93 | 14,08                 | 5,04 | 0,01 | 8051     | 4,86 | 0,91 | 14,08                 | 4,92 | 0,00 |
| 24                    | 745      | 4,93 | 1,17 | 14,69                 | 5,03 | 0,01 | 7406     | 4,87 | 1,01 | 14,69                 | 4,92 | 0,00 |
| 25                    | 654      | 4,89 | 1,25 | 15,31                 | 5,02 | 0,01 | 6645     | 4,83 | 0,92 | 15,31                 | 4,91 | 0,00 |
| 26                    | 557      | 4,78 | 0,78 | 15,92                 | 5,01 | 0,01 | 5507     | 4,82 | 0,93 | 15,92                 | 4,90 | 0,00 |
| 27                    | 492      | 4,73 | 0,73 | 16,53                 | 5,00 | 0,01 | 4708     | 4,77 | 0,81 | 16,53                 | 4,90 | 0,00 |
| 28                    | 428      | 4,82 | 0,76 | 17,14                 | 4,99 | 0,01 | 3809     | 4,77 | 0,91 | 17,14                 | 4,89 | 0,00 |
| 29                    | 353      | 4,75 | 0,59 | 17,76                 | 4,98 | 0,01 | 3071     | 4,77 | 0,83 | 17,76                 | 4,89 | 0,00 |
| 30                    | 250      | 4,68 | 0,66 | 18,37                 | 4,97 | 0,01 | 2260     | 4,78 | 0,76 | 18,37                 | 4,88 | 0,00 |
|                       |          |      |      | 18,98                 | 4,97 | 0,01 |          |      |      | 18,98                 | 4,88 | 0,00 |
|                       |          |      |      | 19,59                 | 4,96 | 0,01 |          |      |      | 19,59                 | 4,87 | 0,00 |
|                       |          |      |      | 20,20                 | 4,96 | 0,01 |          |      |      | 20,20                 | 4,87 | 0,00 |
|                       |          |      |      | 20,82                 | 4,95 | 0,01 |          |      |      | 20,82                 | 4,86 | 0,00 |
|                       |          |      |      | 21,43                 | 4,94 | 0,01 |          |      |      | 21,43                 | 4,86 | 0,00 |
|                       |          |      |      | 22,04                 | 4,94 | 0,01 |          |      |      | 22,04                 | 4,86 | 0,00 |
|                       |          |      |      | 22,65                 | 4,93 | 0,01 |          |      |      | 22,65                 | 4,85 | 0,00 |
|                       |          |      |      | 23,27                 | 4,92 | 0,01 |          |      |      | 23,27                 | 4,85 | 0,00 |
|                       |          |      |      | 23,88                 | 4,91 | 0,01 |          |      |      | 23,88                 | 4,84 | 0,00 |
|                       |          |      |      | 24,49                 | 4,89 | 0,01 |          |      |      | 24,49                 | 4,84 | 0,00 |
|                       |          |      |      | 25,10                 | 4,88 | 0,02 |          |      |      | 25,10                 | 4,83 | 0,00 |
|                       |          |      |      | 25,71                 | 4,86 | 0,02 |          |      |      | 25,71                 | 4,82 | 0,00 |
|                       |          |      |      | 26,33                 | 4,84 | 0,02 |          |      |      | 26,33                 | 4,82 | 0,00 |
|                       |          |      |      | 26,94                 | 4,82 | 0,02 |          |      |      | 26,94                 | 4,81 | 0,00 |
|                       |          |      |      | 27,55                 | 4,80 | 0,02 |          |      |      | 27,55                 | 4,80 | 0,00 |
|                       |          |      |      | 28,16                 | 4,77 | 0,02 |          |      |      | 28,16                 | 4,79 | 0,01 |
|                       |          |      |      | 28,78                 | 4,74 | 0,02 |          |      |      | 28,78                 | 4,78 | 0,01 |
|                       |          |      |      | 29,39                 | 4,71 | 0,03 |          |      |      | 29,39                 | 4,77 | 0,01 |
|                       |          |      |      | 30,00                 | 4,67 | 0,04 |          |      |      | 30,00                 | 4,75 | 0,01 |

| Depression            |          |      |      |                       |      |      |          |      |      |                       |      |      |
|-----------------------|----------|------|------|-----------------------|------|------|----------|------|------|-----------------------|------|------|
| Total Cholesterol     |          |      |      |                       |      |      |          |      |      |                       |      |      |
|                       | Cases    |      |      |                       |      |      | Controls |      |      |                       |      |      |
|                       | Observed |      |      | Predicted             |      |      | Observed |      |      | Predicted             |      |      |
| Time since index date | Number   | Mean | SD   | Time since index date | Mean | SE   | Number   | Mean | SD   | Time since index date | Mean | SE   |
| 0                     | 49       | 6,32 | 1,01 | 0,00                  | 6,18 | 0,05 | 509      | 5,92 | 1,05 | 0,00                  | 5,92 | 0,01 |
| 1                     | 81       | 5,99 | 1,09 | 0,61                  | 6,14 | 0,04 | 622      | 5,87 | 1,01 | 0,61                  | 5,90 | 0,01 |
| 2                     | 104      | 5,99 | 1,03 | 1,22                  | 6,10 | 0,03 | 914      | 5,84 | 1,08 | 1,22                  | 5,87 | 0,01 |
| 3                     | 118      | 5,93 | 1,07 | 1,84                  | 6,07 | 0,03 | 1090     | 5,84 | 1,10 | 1,84                  | 5,85 | 0,01 |
| 4                     | 149      | 6,05 | 1,19 | 2,45                  | 6,03 | 0,03 | 1673     | 5,77 | 1,06 | 2,45                  | 5,82 | 0,01 |
| 5                     | 343      | 5,90 | 1,14 | 3,06                  | 6,00 | 0,03 | 2517     | 5,72 | 1,10 | 3,06                  | 5,80 | 0,01 |
| 6                     | 359      | 5,81 | 1,13 | 3,67                  | 5,97 | 0,03 | 3565     | 5,70 | 1,12 | 3,67                  | 5,78 | 0,01 |
| 7                     | 467      | 5,83 | 1,27 | 4,29                  | 5,94 | 0,03 | 4262     | 5,68 | 1,10 | 4,29                  | 5,76 | 0,01 |
| 8                     | 498      | 5,90 | 1,25 | 4,90                  | 5,91 | 0,03 | 4605     | 5,67 | 1,12 | 4,90                  | 5,74 | 0,01 |
| 9                     | 542      | 5,75 | 1,19 | 5,51                  | 5,88 | 0,03 | 5414     | 5,63 | 1,12 | 5,51                  | 5,73 | 0,01 |
| 10                    | 638      | 5,73 | 1,19 | 6,12                  | 5,86 | 0,03 | 6112     | 5,67 | 1,13 | 6,12                  | 5,71 | 0,01 |
| 11                    | 683      | 5,69 | 1,10 | 6,73                  | 5,83 | 0,03 | 7007     | 5,62 | 1,13 | 6,73                  | 5,70 | 0,01 |
| 12                    | 808      | 5,62 | 1,24 | 7,35                  | 5,81 | 0,02 | 7701     | 5,61 | 1,13 | 7,35                  | 5,68 | 0,01 |
| 13                    | 888      | 5,65 | 1,13 | 7,96                  | 5,78 | 0,02 | 8381     | 5,60 | 1,14 | 7,96                  | 5,67 | 0,01 |
| 14                    | 932      | 5,66 | 1,25 | 8,57                  | 5,76 | 0,02 | 8917     | 5,59 | 1,14 | 8,57                  | 5,66 | 0,01 |
| 15                    | 999      | 5,59 | 1,15 | 9,18                  | 5,74 | 0,02 | 9404     | 5,59 | 1,13 | 9,18                  | 5,65 | 0,01 |
| 16                    | 992      | 5,63 | 1,20 | 9,80                  | 5,72 | 0,02 | 9873     | 5,58 | 1,17 | 9,80                  | 5,64 | 0,00 |
| 17                    | 1051     | 5,53 | 1,14 | 10,41                 | 5,70 | 0,02 | 9775     | 5,57 | 1,14 | 10,41                 | 5,63 | 0,00 |
| 18                    | 1044     | 5,57 | 1,11 | 11,02                 | 5,69 | 0,01 | 10024    | 5,55 | 1,13 | 11,02                 | 5,62 | 0,00 |
| 19                    | 1076     | 5,53 | 1,11 | 11,63                 | 5,67 | 0,01 | 9977     | 5,57 | 1,16 | 11,63                 | 5,61 | 0,00 |
| 20                    | 1025     | 5,61 | 1,13 | 12,24                 | 5,66 | 0,01 | 9765     | 5,59 | 1,14 | 12,24                 | 5,60 | 0,00 |
| 21                    | 975      | 5,59 | 1,07 | 12,86                 | 5,64 | 0,01 | 9391     | 5,59 | 1,16 | 12,86                 | 5,60 | 0,00 |
| 22                    | 883      | 5,65 | 1,12 | 13,47                 | 5,63 | 0,01 | 8945     | 5,60 | 1,13 | 13,47                 | 5,59 | 0,00 |
| 23                    | 933      | 5,59 | 1,18 | 14,08                 | 5,62 | 0,01 | 8468     | 5,59 | 1,14 | 14,08                 | 5,59 | 0,00 |
| 24                    | 784      | 5,64 | 1,14 | 14,69                 | 5,61 | 0,01 | 7795     | 5,61 | 1,13 | 14,69                 | 5,59 | 0,00 |
| 25                    | 682      | 5,58 | 1,11 | 15,31                 | 5,61 | 0,01 | 6958     | 5,57 | 1,12 | 15,31                 | 5,58 | 0,00 |
| 26                    | 584      | 5,54 | 1,07 | 15,92                 | 5,60 | 0,01 | 5761     | 5,56 | 1,12 | 15,92                 | 5,58 | 0,00 |
| 27                    | 503      | 5,60 | 1,15 | 16,53                 | 5,59 | 0,01 | 4903     | 5,58 | 1,13 | 16,53                 | 5,58 | 0,00 |
| 28                    | 442      | 5,67 | 1,14 | 17,14                 | 5,59 | 0,01 | 3972     | 5,57 | 1,12 | 17,14                 | 5,58 | 0,00 |
| 29                    | 370      | 5,56 | 1,07 | 17,76                 | 5,59 | 0,01 | 3207     | 5,56 | 1,10 | 17,76                 | 5,58 | 0,00 |
| 30                    | 259      | 5,45 | 1,05 | 18,37                 | 5,59 | 0,01 | 2363     | 5,55 | 1,14 | 18,37                 | 5,58 | 0,00 |
|                       |          |      |      | 18,98                 | 5,59 | 0,01 |          |      |      | 18,98                 | 5,58 | 0,00 |
|                       |          |      |      | 19,59                 | 5,59 | 0,01 |          |      |      | 19,59                 | 5,58 | 0,00 |
|                       |          |      |      | 20,20                 | 5,59 | 0,01 |          |      |      | 20,20                 | 5,58 | 0,00 |
|                       |          |      |      | 20,82                 | 5,59 | 0,01 |          |      |      | 20,82                 | 5,58 | 0,00 |
|                       |          |      |      | 21,43                 | 5,60 | 0,01 |          |      |      | 21,43                 | 5,58 | 0,00 |
|                       |          |      |      | 22,04                 | 5,60 | 0,01 |          |      |      | 22,04                 | 5,58 | 0,00 |
|                       |          |      |      | 22,65                 | 5,60 | 0,01 |          |      |      | 22,65                 | 5,58 | 0,00 |
|                       |          |      |      | 23,27                 | 5,61 | 0,01 |          |      |      | 23,27                 | 5,58 | 0,01 |
|                       |          |      |      | 23,88                 | 5,61 | 0,01 |          |      |      | 23,88                 | 5,58 | 0,01 |
|                       |          |      |      | 24,49                 | 5,61 | 0,02 |          |      |      | 24,49                 | 5,58 | 0,01 |
|                       |          |      |      | 25,10                 | 5,61 | 0,02 |          |      |      | 25,10                 | 5,58 | 0,01 |
|                       |          |      |      | 25,71                 | 5,61 | 0,02 |          |      |      | 25,71                 | 5,58 | 0,01 |
|                       |          |      |      | 26,33                 | 5,60 | 0,02 |          |      |      | 26,33                 | 5,58 | 0,01 |
|                       |          |      |      | 26,94                 | 5,59 | 0,02 |          |      |      | 26,94                 | 5,58 | 0,01 |
|                       |          |      |      | 27,55                 | 5,58 | 0,02 |          |      |      | 27,55                 | 5,57 | 0,01 |
|                       |          |      |      | 28,16                 | 5,57 | 0,02 |          |      |      | 28,16                 | 5,57 | 0,01 |
|                       |          |      |      | 28,78                 | 5,55 | 0,02 |          |      |      | 28,78                 | 5,56 | 0,01 |
|                       |          |      |      | 29,39                 | 5,53 | 0,03 |          |      |      | 29,39                 | 5,56 | 0,01 |
|                       |          |      |      | 30,00                 | 5,50 | 0,04 |          |      |      | 30,00                 | 5,55 | 0,01 |

| Depression            |          |       |      |                       |      |      |          |      |      |                       |      |      |
|-----------------------|----------|-------|------|-----------------------|------|------|----------|------|------|-----------------------|------|------|
| Log2 Triglycerides    |          |       |      |                       |      |      |          |      |      |                       |      |      |
|                       | Cases    |       |      |                       |      |      | Controls |      |      |                       |      |      |
|                       | Observed |       |      | Predicted             |      |      | Observed |      |      | Predicted             |      |      |
| Time since index date | Number   | Mean  | SD   | Time since index date | Mean | SE   | Number   | Mean | SD   | Time since index date | Mean | SE   |
| 0                     | 48       | 0,48  | 1,04 | 0,00                  | 0,49 | 0,03 | 508      | 0,29 | 0,81 | 0,00                  | 0,30 | 0,01 |
| 1                     | 81       | 0,51  | 1,01 | 0,61                  | 0,46 | 0,02 | 621      | 0,28 | 0,85 | 0,61                  | 0,28 | 0,01 |
| 2                     | 104      | 0,38  | 0,94 | 1,22                  | 0,43 | 0,02 | 912      | 0,24 | 0,80 | 1,22                  | 0,27 | 0,01 |
| 3                     | 117      | 0,36  | 1,00 | 1,84                  | 0,41 | 0,02 | 1084     | 0,24 | 0,81 | 1,84                  | 0,25 | 0,01 |
| 4                     | 148      | 0,25  | 0,83 | 2,45                  | 0,38 | 0,01 | 1666     | 0,20 | 0,79 | 2,45                  | 0,24 | 0,01 |
| 5                     | 342      | 0,27  | 0,86 | 3,06                  | 0,36 | 0,01 | 2510     | 0,16 | 0,81 | 3,06                  | 0,22 | 0,01 |
| 6                     | 358      | 0,30  | 0,83 | 3,67                  | 0,34 | 0,01 | 3548     | 0,17 | 0,81 | 3,67                  | 0,21 | 0,01 |
| 7                     | 466      | 0,29  | 0,83 | 4,29                  | 0,33 | 0,01 | 4239     | 0,15 | 0,81 | 4,29                  | 0,20 | 0,01 |
| 8                     | 497      | 0,29  | 0,83 | 4,90                  | 0,31 | 0,01 | 4591     | 0,15 | 0,80 | 4,90                  | 0,19 | 0,01 |
| 9                     | 539      | 0,22  | 0,81 | 5,51                  | 0,30 | 0,01 | 5387     | 0,14 | 0,81 | 5,51                  | 0,18 | 0,01 |
| 10                    | 637      | 0,30  | 0,84 | 6,12                  | 0,29 | 0,01 | 6088     | 0,15 | 0,82 | 6,12                  | 0,17 | 0,00 |
| 11                    | 678      | 0,30  | 0,86 | 6,73                  | 0,28 | 0,02 | 6970     | 0,13 | 0,81 | 6,73                  | 0,16 | 0,00 |
| 12                    | 791      | 0,18  | 0,86 | 7,35                  | 0,27 | 0,02 | 7664     | 0,12 | 0,81 | 7,35                  | 0,16 | 0,00 |
| 13                    | 875      | 0,23  | 0,87 | 7,96                  | 0,26 | 0,01 | 8331     | 0,12 | 0,81 | 7,96                  | 0,15 | 0,00 |
| 14                    | 924      | 0,22  | 0,85 | 8,57                  | 0,25 | 0,01 | 8885     | 0,10 | 0,82 | 8,57                  | 0,14 | 0,00 |
| 15                    | 990      | 0,12  | 0,78 | 9,18                  | 0,24 | 0,01 | 9378     | 0,10 | 0,80 | 9,18                  | 0,14 | 0,00 |
| 16                    | 986      | 0,17  | 0,83 | 9,80                  | 0,23 | 0,01 | 9822     | 0,10 | 0,82 | 9,80                  | 0,13 | 0,00 |
| 17                    | 1045     | 0,15  | 0,81 | 10,41                 | 0,22 | 0,01 | 9714     | 0,08 | 0,82 | 10,41                 | 0,13 | 0,00 |
| 18                    | 1041     | 0,11  | 0,80 | 11,02                 | 0,22 | 0,01 | 9966     | 0,09 | 0,81 | 11,02                 | 0,12 | 0,00 |
| 19                    | 1072     | 0,11  | 0,82 | 11,63                 | 0,21 | 0,01 | 9925     | 0,08 | 0,80 | 11,63                 | 0,12 | 0,00 |
| 20                    | 1022     | 0,19  | 0,85 | 12,24                 | 0,21 | 0,01 | 9717     | 0,09 | 0,81 | 12,24                 | 0,12 | 0,00 |
| 21                    | 973      | 0,15  | 0,81 | 12,86                 | 0,20 | 0,01 | 9335     | 0,07 | 0,79 | 12,86                 | 0,11 | 0,00 |
| 22                    | 880      | 0,16  | 0,83 | 13,47                 | 0,19 | 0,01 | 8898     | 0,09 | 0,81 | 13,47                 | 0,11 | 0,00 |
| 23                    | 930      | 0,14  | 0,83 | 14,08                 | 0,19 | 0,01 | 8421     | 0,09 | 0,80 | 14,08                 | 0,11 | 0,00 |
| 24                    | 782      | 0,16  | 0,81 | 14,69                 | 0,19 | 0,01 | 7763     | 0,08 | 0,80 | 14,69                 | 0,11 | 0,00 |
| 25                    | 680      | 0,16  | 0,88 | 15,31                 | 0,18 | 0,01 | 6933     | 0,06 | 0,79 | 15,31                 | 0,10 | 0,00 |
| 26                    | 581      | 0,10  | 0,78 | 15,92                 | 0,18 | 0,01 | 5739     | 0,06 | 0,80 | 15,92                 | 0,10 | 0,00 |
| 27                    | 503      | 0,05  | 0,84 | 16,53                 | 0,17 | 0,01 | 4885     | 0,04 | 0,80 | 16,53                 | 0,10 | 0,00 |
| 28                    | 441      | 0,12  | 0,86 | 17,14                 | 0,17 | 0,01 | 3957     | 0,02 | 0,79 | 17,14                 | 0,10 | 0,00 |
| 29                    | 370      | 0,03  | 0,76 | 17,76                 | 0,17 | 0,01 | 3198     | 0,04 | 0,80 | 17,76                 | 0,09 | 0,00 |
| 30                    | 259      | -0,02 | 0,76 | 18,37                 | 0,16 | 0,01 | 2359     | 0,05 | 0,80 | 18,37                 | 0,09 | 0,00 |
|                       |          |       |      | 18,98                 | 0,16 | 0,01 |          |      |      | 18,98                 | 0,09 | 0,00 |
|                       |          |       |      | 19,59                 | 0,16 | 0,01 |          |      |      | 19,59                 | 0,09 | 0,00 |
|                       |          |       |      | 20,20                 | 0,16 | 0,01 |          |      |      | 20,20                 | 0,08 | 0,00 |
|                       |          |       |      | 20,82                 | 0,16 | 0,01 |          |      |      | 20,82                 | 0,08 | 0,00 |
|                       |          |       |      | 21,43                 | 0,15 | 0,01 |          |      |      | 21,43                 | 0,08 | 0,00 |
|                       |          |       |      | 22,04                 | 0,15 | 0,01 |          |      |      | 22,04                 | 0,08 | 0,00 |
|                       |          |       |      | 22,65                 | 0,15 | 0,01 |          |      |      | 22,65                 | 0,07 | 0,00 |
|                       |          |       |      | 23,27                 | 0,14 | 0,01 |          |      |      | 23,27                 | 0,07 | 0,00 |
|                       |          |       |      | 23,88                 | 0,14 | 0,01 |          |      |      | 23,88                 | 0,07 | 0,00 |
|                       |          |       |      | 24,49                 | 0,13 | 0,01 |          |      |      | 24,49                 | 0,06 | 0,00 |
|                       |          |       |      | 25,10                 | 0,13 | 0,01 |          |      |      | 25,10                 | 0,06 | 0,00 |
|                       |          |       |      | 25,71                 | 0,12 | 0,01 |          |      |      | 25,71                 | 0,06 | 0,00 |
|                       |          |       |      | 26,33                 | 0,11 | 0,01 |          |      |      | 26,33                 | 0,05 | 0,00 |
|                       |          |       |      | 26,94                 | 0,10 | 0,01 |          |      |      | 26,94                 | 0,05 | 0,00 |
|                       |          |       |      | 27,55                 | 0,08 | 0,02 |          |      |      | 27,55                 | 0,05 | 0,00 |
|                       |          |       |      | 28,16                 | 0,07 | 0,02 |          |      |      | 28,16                 | 0,04 | 0,00 |
|                       |          |       |      | 28,78                 | 0,05 | 0,02 |          |      |      | 28,78                 | 0,04 | 0,00 |
|                       |          |       |      | 29,39                 | 0,02 | 0,03 |          |      |      | 29,39                 | 0,04 | 0,01 |
|                       |          |       |      | 30,00                 | 0,00 | 0,04 |          |      |      | 30,00                 | 0,03 | 0,01 |

| Depression            |          |      |      |                       |      |      |          |      |      |                       |      |      |
|-----------------------|----------|------|------|-----------------------|------|------|----------|------|------|-----------------------|------|------|
| LDL-C                 |          |      |      |                       |      |      |          |      |      |                       |      |      |
|                       | Cases    |      |      |                       |      |      | Controls |      |      |                       |      |      |
|                       | Observed |      |      | Predicted             |      |      | Observed |      |      | Predicted             |      |      |
| Time since index date | Number   | Mean | SD   | Time since index date | Mean | SE   | Number   | Mean | SD   | Time since index date | Mean | SE   |
| 0                     | 26       | 4,06 | 1,20 | 0,00                  | 3,85 | 0,02 | 232      | 3,91 | 1,00 | 0,00                  | 3,88 | 0,03 |
| 1                     | 43       | 3,56 | 1,14 | 0,61                  | 3,84 | 0,02 | 291      | 3,78 | 0,94 | 0,61                  | 3,86 | 0,02 |
| 2                     | 46       | 3,72 | 1,04 | 1,22                  | 3,84 | 0,02 | 371      | 3,82 | 0,95 | 1,22                  | 3,84 | 0,02 |
| 3                     | 57       | 3,89 | 1,16 | 1,84                  | 3,83 | 0,02 | 447      | 3,83 | 1,10 | 1,84                  | 3,82 | 0,02 |
| 4                     | 60       | 3,96 | 1,16 | 2,45                  | 3,83 | 0,02 | 617      | 3,77 | 0,99 | 2,45                  | 3,80 | 0,02 |
| 5                     | 128      | 3,87 | 1,08 | 3,06                  | 3,82 | 0,02 | 976      | 3,69 | 1,04 | 3,06                  | 3,79 | 0,02 |
| 6                     | 134      | 3,68 | 1,09 | 3,67                  | 3,81 | 0,03 | 1325     | 3,72 | 1,04 | 3,67                  | 3,77 | 0,01 |
| 7                     | 182      | 3,72 | 1,11 | 4,29                  | 3,80 | 0,03 | 1614     | 3,68 | 1,05 | 4,29                  | 3,75 | 0,01 |
| 8                     | 176      | 3,79 | 1,18 | 4,90                  | 3,80 | 0,03 | 1746     | 3,70 | 1,05 | 4,90                  | 3,74 | 0,01 |
| 9                     | 206      | 3,69 | 1,07 | 5,51                  | 3,79 | 0,04 | 1985     | 3,65 | 1,03 | 5,51                  | 3,72 | 0,01 |
| 10                    | 234      | 3,76 | 1,14 | 6,12                  | 3,78 | 0,04 | 2311     | 3,68 | 1,07 | 6,12                  | 3,71 | 0,01 |
| 11                    | 250      | 3,63 | 1,02 | 6,73                  | 3,77 | 0,04 | 2645     | 3,60 | 1,04 | 6,73                  | 3,70 | 0,01 |
| 12                    | 304      | 3,69 | 1,12 | 7,35                  | 3,76 | 0,03 | 2794     | 3,65 | 1,08 | 7,35                  | 3,69 | 0,01 |
| 13                    | 328      | 3,75 | 1,06 | 7,96                  | 3,75 | 0,03 | 2975     | 3,63 | 1,06 | 7,96                  | 3,68 | 0,01 |
| 14                    | 295      | 3,74 | 1,23 | 8,57                  | 3,74 | 0,03 | 3013     | 3,61 | 1,08 | 8,57                  | 3,67 | 0,01 |
| 15                    | 341      | 3,63 | 1,12 | 9,18                  | 3,73 | 0,02 | 3274     | 3,60 | 1,06 | 9,18                  | 3,66 | 0,01 |
| 16                    | 321      | 3,68 | 1,12 | 9,80                  | 3,72 | 0,02 | 3380     | 3,61 | 1,09 | 9,80                  | 3,65 | 0,01 |
| 17                    | 324      | 3,61 | 1,07 | 10,41                 | 3,71 | 0,02 | 3271     | 3,64 | 1,10 | 10,41                 | 3,64 | 0,01 |
| 18                    | 344      | 3,62 | 1,12 | 11,02                 | 3,70 | 0,02 | 3248     | 3,57 | 1,09 | 11,02                 | 3,64 | 0,01 |
| 19                    | 338      | 3,53 | 1,05 | 11,63                 | 3,69 | 0,02 | 3194     | 3,59 | 1,08 | 11,63                 | 3,63 | 0,01 |
| 20                    | 327      | 3,64 | 1,09 | 12,24                 | 3,68 | 0,02 | 3125     | 3,61 | 1,08 | 12,24                 | 3,63 | 0,01 |
| 21                    | 309      | 3,50 | 1,10 | 12,86                 | 3,67 | 0,02 | 3027     | 3,68 | 1,13 | 12,86                 | 3,62 | 0,01 |
| 22                    | 272      | 3,62 | 1,03 | 13,47                 | 3,66 | 0,02 | 2858     | 3,65 | 1,09 | 13,47                 | 3,62 | 0,01 |
| 23                    | 301      | 3,56 | 1,04 | 14,08                 | 3,66 | 0,02 | 2641     | 3,61 | 1,05 | 14,08                 | 3,62 | 0,01 |
| 24                    | 248      | 3,62 | 1,00 | 14,69                 | 3,65 | 0,02 | 2419     | 3,65 | 1,06 | 14,69                 | 3,61 | 0,01 |
| 25                    | 186      | 3,57 | 1,18 | 15,31                 | 3,64 | 0,02 | 2036     | 3,62 | 1,08 | 15,31                 | 3,61 | 0,01 |
| 26                    | 166      | 3,50 | 1,04 | 15,92                 | 3,64 | 0,02 | 1585     | 3,57 | 1,09 | 15,92                 | 3,61 | 0,01 |
| 27                    | 145      | 3,60 | 1,12 | 16,53                 | 3,63 | 0,02 | 1307     | 3,59 | 1,07 | 16,53                 | 3,61 | 0,01 |
| 28                    | 116      | 3,49 | 1,07 | 17,14                 | 3,63 | 0,02 | 1084     | 3,59 | 1,05 | 17,14                 | 3,61 | 0,01 |
| 29                    | 101      | 3,59 | 1,14 | 17,76                 | 3,62 | 0,02 | 835      | 3,57 | 1,00 | 17,76                 | 3,61 | 0,01 |
| 30                    | 54       | 3,14 | 0,96 | 18,37                 | 3,62 | 0,02 | 515      | 3,54 | 1,08 | 18,37                 | 3,62 | 0,01 |
|                       |          |      |      | 18,98                 | 3,62 | 0,02 |          |      |      | 18,98                 | 3,62 | 0,01 |
|                       |          |      |      | 19,59                 | 3,62 | 0,02 |          |      |      | 19,59                 | 3,62 | 0,01 |
|                       |          |      |      | 20,20                 | 3,61 | 0,02 |          |      |      | 20,20                 | 3,62 | 0,01 |
|                       |          |      |      | 20,82                 | 3,61 | 0,02 |          |      |      | 20,82                 | 3,62 | 0,01 |
|                       |          |      |      | 21,43                 | 3,61 | 0,02 |          |      |      | 21,43                 | 3,62 | 0,01 |
|                       |          |      |      | 22,04                 | 3,61 | 0,02 |          |      |      | 22,04                 | 3,62 | 0,01 |
|                       |          |      |      | 22,65                 | 3,60 | 0,02 |          |      |      | 22,65                 | 3,62 | 0,01 |
|                       |          |      |      | 23,27                 | 3,60 | 0,02 |          |      |      | 23,27                 | 3,62 | 0,01 |
|                       |          |      |      | 23,88                 | 3,59 | 0,02 |          |      |      | 23,88                 | 3,62 | 0,01 |
|                       |          |      |      | 24,49                 | 3,58 | 0,03 |          |      |      | 24,49                 | 3,62 | 0,01 |
|                       |          |      |      | 25,10                 | 3,57 | 0,03 |          |      |      | 25,10                 | 3,62 | 0,01 |
|                       |          |      |      | 25,71                 | 3,56 | 0,03 |          |      |      | 25,71                 | 3,61 | 0,01 |
|                       |          |      |      | 26,33                 | 3,54 | 0,03 |          |      |      | 26,33                 | 3,61 | 0,01 |
|                       |          |      |      | 26,94                 | 3,52 | 0,03 |          |      |      | 26,94                 | 3,60 | 0,01 |
|                       |          |      |      | 27,55                 | 3,49 | 0,03 |          |      |      | 27,55                 | 3,59 | 0,01 |
|                       |          |      |      | 28,16                 | 3,46 | 0,03 |          |      |      | 28,16                 | 3,58 | 0,01 |
|                       |          |      |      | 28,78                 | 3,42 | 0,04 |          |      |      | 28,78                 | 3,57 | 0,01 |
|                       |          |      |      | 29,39                 | 3,37 | 0,05 |          |      |      | 29,39                 | 3,55 | 0,01 |
|                       |          |      |      | 30,00                 | 3,31 | 0,07 |          |      |      | 30,00                 | 3,54 | 0,01 |

| Depression            |          |      |      |                       |      |      |          |      |      |                       |      |      |
|-----------------------|----------|------|------|-----------------------|------|------|----------|------|------|-----------------------|------|------|
| HDL-C                 |          |      |      |                       |      |      |          |      |      |                       |      |      |
| Time since index date | Cases    |      |      |                       |      |      | Controls |      |      |                       |      |      |
|                       | Observed |      |      | Predicted             |      |      | Observed |      |      | Predicted             |      |      |
|                       | Number   | Mean | SD   | Time since index date | Mean | SE   | Number   | Mean | SD   | Time since index date | Mean | SE   |
| 0                     | 27       | 1,48 | 0,32 | 0,00                  | 1,48 | 0,04 | 233      | 1,57 | 0,39 | 0,00                  | 1,56 | 0,01 |
| 1                     | 42       | 1,52 | 0,36 | 0,61                  | 1,51 | 0,03 | 293      | 1,55 | 0,41 | 0,61                  | 1,56 | 0,01 |
| 2                     | 45       | 1,52 | 0,36 | 1,22                  | 1,52 | 0,03 | 354      | 1,56 | 0,39 | 1,22                  | 1,56 | 0,01 |
| 3                     | 53       | 1,55 | 0,44 | 1,84                  | 1,54 | 0,02 | 451      | 1,56 | 0,41 | 1,84                  | 1,56 | 0,00 |
| 4                     | 59       | 1,68 | 0,55 | 2,45                  | 1,55 | 0,02 | 620      | 1,55 | 0,39 | 2,45                  | 1,56 | 0,00 |
| 5                     | 125      | 1,59 | 0,45 | 3,06                  | 1,56 | 0,02 | 970      | 1,55 | 0,39 | 3,06                  | 1,56 | 0,00 |
| 6                     | 129      | 1,51 | 0,39 | 3,67                  | 1,56 | 0,02 | 1342     | 1,56 | 0,39 | 3,67                  | 1,56 | 0,00 |
| 7                     | 191      | 1,53 | 0,41 | 4,29                  | 1,57 | 0,02 | 1616     | 1,59 | 0,40 | 4,29                  | 1,56 | 0,00 |
| 8                     | 180      | 1,53 | 0,37 | 4,90                  | 1,57 | 0,02 | 1796     | 1,56 | 0,38 | 4,90                  | 1,56 | 0,00 |
| 9                     | 204      | 1,62 | 0,44 | 5,51                  | 1,57 | 0,02 | 2040     | 1,57 | 0,40 | 5,51                  | 1,56 | 0,00 |
| 10                    | 223      | 1,54 | 0,40 | 6,12                  | 1,57 | 0,02 | 2359     | 1,57 | 0,39 | 6,12                  | 1,56 | 0,00 |
| 11                    | 244      | 1,54 | 0,38 | 6,73                  | 1,57 | 0,02 | 2704     | 1,58 | 0,40 | 6,73                  | 1,56 | 0,00 |
| 12                    | 312      | 1,54 | 0,37 | 7,35                  | 1,57 | 0,02 | 2887     | 1,57 | 0,39 | 7,35                  | 1,57 | 0,00 |
| 13                    | 326      | 1,53 | 0,39 | 7,96                  | 1,57 | 0,02 | 3049     | 1,56 | 0,40 | 7,96                  | 1,57 | 0,00 |
| 14                    | 296      | 1,55 | 0,38 | 8,57                  | 1,56 | 0,02 | 3068     | 1,56 | 0,39 | 8,57                  | 1,57 | 0,00 |
| 15                    | 347      | 1,57 | 0,41 | 9,18                  | 1,56 | 0,01 | 3316     | 1,57 | 0,39 | 9,18                  | 1,57 | 0,00 |
| 16                    | 333      | 1,55 | 0,40 | 9,80                  | 1,56 | 0,01 | 3404     | 1,58 | 0,39 | 9,80                  | 1,57 | 0,00 |
| 17                    | 334      | 1,51 | 0,35 | 10,41                 | 1,55 | 0,01 | 3319     | 1,57 | 0,39 | 10,41                 | 1,57 | 0,00 |
| 18                    | 338      | 1,58 | 0,38 | 11,02                 | 1,55 | 0,01 | 3296     | 1,58 | 0,39 | 11,02                 | 1,57 | 0,00 |
| 19                    | 334      | 1,61 | 0,38 | 11,63                 | 1,55 | 0,01 | 3226     | 1,57 | 0,39 | 11,63                 | 1,57 | 0,00 |
| 20                    | 326      | 1,54 | 0,41 | 12,24                 | 1,55 | 0,01 | 3157     | 1,57 | 0,38 | 12,24                 | 1,57 | 0,00 |
| 21                    | 310      | 1,60 | 0,41 | 12,86                 | 1,54 | 0,01 | 3047     | 1,58 | 0,40 | 12,86                 | 1,57 | 0,00 |
| 22                    | 261      | 1,59 | 0,37 | 13,47                 | 1,54 | 0,01 | 2853     | 1,58 | 0,39 | 13,47                 | 1,57 | 0,00 |
| 23                    | 298      | 1,60 | 0,42 | 14,08                 | 1,54 | 0,01 | 2630     | 1,58 | 0,38 | 14,08                 | 1,57 | 0,00 |
| 24                    | 245      | 1,58 | 0,39 | 14,69                 | 1,54 | 0,01 | 2396     | 1,58 | 0,38 | 14,69                 | 1,57 | 0,00 |
| 25                    | 190      | 1,61 | 0,41 | 15,31                 | 1,54 | 0,01 | 2048     | 1,58 | 0,37 | 15,31                 | 1,57 | 0,00 |
| 26                    | 162      | 1,62 | 0,34 | 15,92                 | 1,54 | 0,01 | 1562     | 1,60 | 0,38 | 15,92                 | 1,57 | 0,00 |
| 27                    | 136      | 1,65 | 0,38 | 16,53                 | 1,55 | 0,01 | 1265     | 1,59 | 0,37 | 16,53                 | 1,57 | 0,00 |
| 28                    | 111      | 1,64 | 0,39 | 17,14                 | 1,55 | 0,01 | 1039     | 1,60 | 0,37 | 17,14                 | 1,57 | 0,00 |
| 29                    | 95       | 1,66 | 0,39 | 17,76                 | 1,55 | 0,01 | 805      | 1,58 | 0,37 | 17,76                 | 1,58 | 0,00 |
| 30                    | 51       | 1,61 | 0,33 | 18,37                 | 1,56 | 0,01 | 489      | 1,58 | 0,37 | 18,37                 | 1,58 | 0,00 |
|                       |          |      |      | 18,98                 | 1,56 | 0,01 |          |      |      | 18,98                 | 1,58 | 0,00 |
|                       |          |      |      | 19,59                 | 1,57 | 0,01 |          |      |      | 19,59                 | 1,58 | 0,00 |
|                       |          |      |      | 20,20                 | 1,57 | 0,01 |          |      |      | 20,20                 | 1,58 | 0,00 |
|                       |          |      |      | 20,82                 | 1,58 | 0,01 |          |      |      | 20,82                 | 1,58 | 0,00 |
|                       |          |      |      | 21,43                 | 1,58 | 0,01 |          |      |      | 21,43                 | 1,58 | 0,00 |
|                       |          |      |      | 22,04                 | 1,59 | 0,01 |          |      |      | 22,04                 | 1,58 | 0,00 |
|                       |          |      |      | 22,65                 | 1,60 | 0,01 |          |      |      | 22,65                 | 1,58 | 0,00 |
|                       |          |      |      | 23,27                 | 1,60 | 0,01 |          |      |      | 23,27                 | 1,58 | 0,00 |
|                       |          |      |      | 23,88                 | 1,61 | 0,01 |          |      |      | 23,88                 | 1,58 | 0,00 |
|                       |          |      |      | 24,49                 | 1,62 | 0,01 |          |      |      | 24,49                 | 1,58 | 0,00 |
|                       |          |      |      | 25,10                 | 1,62 | 0,01 |          |      |      | 25,10                 | 1,59 | 0,00 |
|                       |          |      |      | 25,71                 | 1,63 | 0,01 |          |      |      | 25,71                 | 1,59 | 0,00 |
|                       |          |      |      | 26,33                 | 1,63 | 0,01 |          |      |      | 26,33                 | 1,59 | 0,00 |
|                       |          |      |      | 26,94                 | 1,63 | 0,01 |          |      |      | 26,94                 | 1,59 | 0,00 |
|                       |          |      |      | 27,55                 | 1,64 | 0,01 |          |      |      | 27,55                 | 1,59 | 0,00 |
|                       |          |      |      | 28,16                 | 1,64 | 0,01 |          |      |      | 28,16                 | 1,59 | 0,00 |
|                       |          |      |      | 28,78                 | 1,64 | 0,01 |          |      |      | 28,78                 | 1,58 | 0,00 |
|                       |          |      |      | 29,39                 | 1,64 | 0,01 |          |      |      | 29,39                 | 1,58 | 0,00 |
|                       |          |      |      | 30,00                 | 1,63 | 0,01 |          |      |      | 30,00                 | 1,58 | 0,00 |

| Depression            |          |      |      |                       |      |      |          |      |      |                       |      |      |
|-----------------------|----------|------|------|-----------------------|------|------|----------|------|------|-----------------------|------|------|
| ApoA-I                |          |      |      |                       |      |      |          |      |      |                       |      |      |
|                       | Cases    |      |      |                       |      |      | Controls |      |      |                       |      |      |
|                       | Observed |      |      | Predicted             |      |      | Observed |      |      | Predicted             |      |      |
| Time since index date | Number   | Mean | SD   | Time since index date | Mean | SE   | Number   | Mean | SD   | Time since index date | Mean | SE   |
| 0                     | 24       | 1,51 | 0,26 | 0,00                  | 1,52 | 0,02 | 204      | 1,44 | 0,23 | 0,00                  | 1,44 | 0,01 |
| 1                     | 37       | 1,52 | 0,25 | 0,61                  | 1,51 | 0,01 | 258      | 1,43 | 0,23 | 0,61                  | 1,43 | 0,01 |
| 2                     | 43       | 1,49 | 0,21 | 1,22                  | 1,50 | 0,01 | 331      | 1,43 | 0,23 | 1,22                  | 1,43 | 0,01 |
| 3                     | 54       | 1,46 | 0,24 | 1,84                  | 1,49 | 0,01 | 399      | 1,45 | 0,23 | 1,84                  | 1,43 | 0,00 |
| 4                     | 53       | 1,50 | 0,30 | 2,45                  | 1,48 | 0,01 | 556      | 1,43 | 0,22 | 2,45                  | 1,43 | 0,00 |
| 5                     | 115      | 1,45 | 0,29 | 3,06                  | 1,48 | 0,01 | 810      | 1,42 | 0,23 | 3,06                  | 1,43 | 0,00 |
| 6                     | 115      | 1,42 | 0,24 | 3,67                  | 1,47 | 0,01 | 1080     | 1,42 | 0,23 | 3,67                  | 1,43 | 0,00 |
| 7                     | 148      | 1,42 | 0,21 | 4,29                  | 1,46 | 0,01 | 1291     | 1,44 | 0,23 | 4,29                  | 1,43 | 0,00 |
| 8                     | 138      | 1,43 | 0,20 | 4,90                  | 1,46 | 0,01 | 1464     | 1,42 | 0,21 | 4,90                  | 1,43 | 0,00 |
| 9                     | 160      | 1,46 | 0,24 | 5,51                  | 1,45 | 0,01 | 1646     | 1,43 | 0,23 | 5,51                  | 1,43 | 0,00 |
| 10                    | 194      | 1,42 | 0,24 | 6,12                  | 1,45 | 0,01 | 1932     | 1,43 | 0,22 | 6,12                  | 1,43 | 0,00 |
| 11                    | 189      | 1,44 | 0,23 | 6,73                  | 1,44 | 0,01 | 2182     | 1,43 | 0,23 | 6,73                  | 1,43 | 0,00 |
| 12                    | 255      | 1,40 | 0,22 | 7,35                  | 1,44 | 0,01 | 2375     | 1,42 | 0,22 | 7,35                  | 1,43 | 0,00 |
| 13                    | 264      | 1,42 | 0,21 | 7,96                  | 1,43 | 0,01 | 2565     | 1,42 | 0,22 | 7,96                  | 1,43 | 0,00 |
| 14                    | 261      | 1,44 | 0,23 | 8,57                  | 1,43 | 0,01 | 2649     | 1,41 | 0,22 | 8,57                  | 1,43 | 0,00 |
| 15                    | 296      | 1,42 | 0,23 | 9,18                  | 1,43 | 0,01 | 2884     | 1,42 | 0,22 | 9,18                  | 1,43 | 0,00 |
| 16                    | 292      | 1,42 | 0,22 | 9,80                  | 1,42 | 0,01 | 2971     | 1,42 | 0,23 | 9,80                  | 1,43 | 0,00 |
| 17                    | 289      | 1,40 | 0,20 | 10,41                 | 1,42 | 0,01 | 2911     | 1,42 | 0,22 | 10,41                 | 1,43 | 0,00 |
| 18                    | 293      | 1,41 | 0,21 | 11,02                 | 1,42 | 0,01 | 2869     | 1,43 | 0,22 | 11,02                 | 1,42 | 0,00 |
| 19                    | 310      | 1,44 | 0,23 | 11,63                 | 1,42 | 0,01 | 2850     | 1,42 | 0,22 | 11,63                 | 1,42 | 0,00 |
| 20                    | 305      | 1,41 | 0,24 | 12,24                 | 1,42 | 0,01 | 2841     | 1,42 | 0,22 | 12,24                 | 1,42 | 0,00 |
| 21                    | 275      | 1,46 | 0,25 | 12,86                 | 1,42 | 0,01 | 2741     | 1,42 | 0,23 | 12,86                 | 1,42 | 0,00 |
| 22                    | 247      | 1,43 | 0,22 | 13,47                 | 1,42 | 0,01 | 2593     | 1,42 | 0,22 | 13,47                 | 1,42 | 0,00 |
| 23                    | 271      | 1,43 | 0,24 | 14,08                 | 1,42 | 0,01 | 2401     | 1,42 | 0,22 | 14,08                 | 1,42 | 0,00 |
| 24                    | 228      | 1,44 | 0,24 | 14,69                 | 1,42 | 0,01 | 2229     | 1,42 | 0,22 | 14,69                 | 1,42 | 0,00 |
| 25                    | 186      | 1,44 | 0,22 | 15,31                 | 1,42 | 0,01 | 1946     | 1,42 | 0,21 | 15,31                 | 1,42 | 0,00 |
| 26                    | 166      | 1,44 | 0,22 | 15,92                 | 1,42 | 0,01 | 1558     | 1,42 | 0,22 | 15,92                 | 1,42 | 0,00 |
| 27                    | 145      | 1,45 | 0,23 | 16,53                 | 1,42 | 0,01 | 1307     | 1,42 | 0,22 | 16,53                 | 1,42 | 0,00 |
| 28                    | 116      | 1,45 | 0,23 | 17,14                 | 1,42 | 0,01 | 1082     | 1,42 | 0,22 | 17,14                 | 1,42 | 0,00 |
| 29                    | 101      | 1,44 | 0,23 | 17,76                 | 1,42 | 0,01 | 836      | 1,41 | 0,21 | 17,76                 | 1,42 | 0,00 |
| 30                    | 54       | 1,42 | 0,24 | 18,37                 | 1,42 | 0,01 | 515      | 1,41 | 0,21 | 18,37                 | 1,42 | 0,00 |
|                       |          |      |      | 18,98                 | 1,43 | 0,01 |          |      |      | 18,98                 | 1,42 | 0,00 |
|                       |          |      |      | 19,59                 | 1,43 | 0,01 |          |      |      | 19,59                 | 1,42 | 0,00 |
|                       |          |      |      | 20,20                 | 1,43 | 0,01 |          |      |      | 20,20                 | 1,42 | 0,00 |
|                       |          |      |      | 20,82                 | 1,43 | 0,01 |          |      |      | 20,82                 | 1,42 | 0,00 |
|                       |          |      |      | 21,43                 | 1,43 | 0,01 |          |      |      | 21,43                 | 1,42 | 0,00 |
|                       |          |      |      | 22,04                 | 1,44 | 0,01 |          |      |      | 22,04                 | 1,42 | 0,00 |
|                       |          |      |      | 22,65                 | 1,44 | 0,00 |          |      |      | 22,65                 | 1,42 | 0,00 |
|                       |          |      |      | 23,27                 | 1,44 | 0,00 |          |      |      | 23,27                 | 1,42 | 0,00 |
|                       |          |      |      | 23,88                 | 1,44 | 0,00 |          |      |      | 23,88                 | 1,42 | 0,00 |
|                       |          |      |      | 24,49                 | 1,44 | 0,00 |          |      |      | 24,49                 | 1,42 | 0,00 |
|                       |          |      |      | 25,10                 | 1,44 | 0,00 |          |      |      | 25,10                 | 1,42 | 0,00 |
|                       |          |      |      | 25,71                 | 1,44 | 0,00 |          |      |      | 25,71                 | 1,42 | 0,00 |
|                       |          |      |      | 26,33                 | 1,44 | 0,00 |          |      |      | 26,33                 | 1,42 | 0,00 |
|                       |          |      |      | 26,94                 | 1,44 | 0,00 |          |      |      | 26,94                 | 1,42 | 0,00 |
|                       |          |      |      | 27,55                 | 1,44 | 0,00 |          |      |      | 27,55                 | 1,42 | 0,00 |
|                       |          |      |      | 28,16                 | 1,44 | 0,00 |          |      |      | 28,16                 | 1,42 | 0,00 |
|                       |          |      |      | 28,78                 | 1,44 | 0,00 |          |      |      | 28,78                 | 1,42 | 0,00 |
|                       |          |      |      | 29,39                 | 1,43 | 0,00 |          |      |      | 29,39                 | 1,41 | 0,00 |
|                       |          |      |      | 30,00                 | 1,43 | 0,00 |          |      |      | 30,00                 | 1,41 | 0,00 |



| Depression            |          |      |      |                       |      |      |          |      |      |                       |      |      |
|-----------------------|----------|------|------|-----------------------|------|------|----------|------|------|-----------------------|------|------|
| ApoB                  |          |      |      |                       |      |      |          |      |      |                       |      |      |
|                       | Cases    |      |      |                       |      |      | Controls |      |      |                       |      |      |
|                       | Observed |      |      | Predicted             |      |      | Observed |      |      | Predicted             |      |      |
| Time since index date | Number   | Mean | SD   | Time since index date | Mean | SE   | Number   | Mean | SD   | Time since index date | Mean | SE   |
| 0                     | 26       | 1,47 | 0,37 | 0,00                  | 1,46 | 0,02 | 216      | 1,24 | 0,35 | 0,00                  | 1,25 | 0,01 |
| 1                     | 37       | 1,35 | 0,43 | 0,61                  | 1,43 | 0,01 | 258      | 1,24 | 0,35 | 0,61                  | 1,25 | 0,01 |
| 2                     | 40       | 1,40 | 0,37 | 1,22                  | 1,41 | 0,01 | 334      | 1,26 | 0,32 | 1,22                  | 1,24 | 0,01 |
| 3                     | 51       | 1,40 | 0,42 | 1,84                  | 1,38 | 0,01 | 393      | 1,23 | 0,35 | 1,84                  | 1,24 | 0,00 |
| 4                     | 46       | 1,35 | 0,38 | 2,45                  | 1,36 | 0,01 | 552      | 1,23 | 0,34 | 2,45                  | 1,23 | 0,00 |
| 5                     | 113      | 1,28 | 0,39 | 3,06                  | 1,34 | 0,01 | 756      | 1,20 | 0,34 | 3,06                  | 1,23 | 0,00 |
| 6                     | 99       | 1,18 | 0,37 | 3,67                  | 1,32 | 0,01 | 1035     | 1,21 | 0,35 | 3,67                  | 1,23 | 0,00 |
| 7                     | 125      | 1,23 | 0,39 | 4,29                  | 1,31 | 0,02 | 1217     | 1,20 | 0,36 | 4,29                  | 1,22 | 0,00 |
| 8                     | 123      | 1,23 | 0,41 | 4,90                  | 1,29 | 0,02 | 1401     | 1,20 | 0,36 | 4,90                  | 1,22 | 0,00 |
| 9                     | 162      | 1,24 | 0,36 | 5,51                  | 1,28 | 0,02 | 1631     | 1,19 | 0,35 | 5,51                  | 1,21 | 0,00 |
| 10                    | 184      | 1,25 | 0,39 | 6,12                  | 1,27 | 0,02 | 1870     | 1,20 | 0,36 | 6,12                  | 1,21 | 0,00 |
| 11                    | 182      | 1,26 | 0,40 | 6,73                  | 1,26 | 0,01 | 2036     | 1,19 | 0,37 | 6,73                  | 1,21 | 0,00 |
| 12                    | 232      | 1,19 | 0,38 | 7,35                  | 1,25 | 0,01 | 2230     | 1,20 | 0,36 | 7,35                  | 1,20 | 0,00 |
| 13                    | 235      | 1,24 | 0,36 | 7,96                  | 1,24 | 0,01 | 2423     | 1,19 | 0,37 | 7,96                  | 1,20 | 0,00 |
| 14                    | 255      | 1,24 | 0,42 | 8,57                  | 1,24 | 0,01 | 2514     | 1,19 | 0,37 | 8,57                  | 1,20 | 0,00 |
| 15                    | 257      | 1,23 | 0,37 | 9,18                  | 1,23 | 0,01 | 2584     | 1,20 | 0,35 | 9,18                  | 1,20 | 0,00 |
| 16                    | 254      | 1,22 | 0,39 | 9,80                  | 1,22 | 0,01 | 2631     | 1,20 | 0,36 | 9,80                  | 1,19 | 0,00 |
| 17                    | 261      | 1,18 | 0,33 | 10,41                 | 1,22 | 0,01 | 2613     | 1,20 | 0,36 | 10,41                 | 1,19 | 0,00 |
| 18                    | 266      | 1,19 | 0,38 | 11,02                 | 1,22 | 0,01 | 2612     | 1,19 | 0,36 | 11,02                 | 1,19 | 0,00 |
| 19                    | 277      | 1,20 | 0,36 | 11,63                 | 1,21 | 0,01 | 2507     | 1,20 | 0,36 | 11,63                 | 1,19 | 0,00 |
| 20                    | 287      | 1,22 | 0,34 | 12,24                 | 1,21 | 0,01 | 2538     | 1,21 | 0,35 | 12,24                 | 1,19 | 0,00 |
| 21                    | 253      | 1,19 | 0,35 | 12,86                 | 1,21 | 0,01 | 2391     | 1,22 | 0,37 | 12,86                 | 1,19 | 0,00 |
| 22                    | 211      | 1,23 | 0,39 | 13,47                 | 1,21 | 0,01 | 2337     | 1,23 | 0,36 | 13,47                 | 1,19 | 0,00 |
| 23                    | 230      | 1,23 | 0,34 | 14,08                 | 1,21 | 0,01 | 2095     | 1,22 | 0,34 | 14,08                 | 1,19 | 0,00 |
| 24                    | 200      | 1,29 | 0,38 | 14,69                 | 1,21 | 0,01 | 1972     | 1,24 | 0,35 | 14,69                 | 1,19 | 0,00 |
| 25                    | 168      | 1,23 | 0,37 | 15,31                 | 1,21 | 0,01 | 1674     | 1,25 | 0,34 | 15,31                 | 1,19 | 0,00 |
| 26                    | 130      | 1,23 | 0,34 | 15,92                 | 1,21 | 0,01 | 1333     | 1,25 | 0,34 | 15,92                 | 1,19 | 0,00 |
| 27                    | 123      | 1,30 | 0,37 | 16,53                 | 1,21 | 0,01 | 1037     | 1,28 | 0,36 | 16,53                 | 1,20 | 0,00 |
| 28                    | 79       | 1,23 | 0,32 | 17,14                 | 1,21 | 0,01 | 786      | 1,27 | 0,34 | 17,14                 | 1,20 | 0,00 |
| 29                    | 65       | 1,22 | 0,30 | 17,76                 | 1,22 | 0,01 | 631      | 1,27 | 0,31 | 17,76                 | 1,20 | 0,00 |
| 30                    | 41       | 1,16 | 0,28 | 18,37                 | 1,22 | 0,01 | 419      | 1,26 | 0,31 | 18,37                 | 1,20 | 0,00 |
|                       |          |      |      | 18,98                 | 1,22 | 0,01 |          |      |      | 18,98                 | 1,21 | 0,00 |
|                       |          |      |      | 19,59                 | 1,22 | 0,01 |          |      |      | 19,59                 | 1,21 | 0,00 |
|                       |          |      |      | 20,20                 | 1,23 | 0,01 |          |      |      | 20,20                 | 1,21 | 0,00 |
|                       |          |      |      | 20,82                 | 1,23 | 0,01 |          |      |      | 20,82                 | 1,22 | 0,00 |
|                       |          |      |      | 21,43                 | 1,23 | 0,01 |          |      |      | 21,43                 | 1,22 | 0,00 |
|                       |          |      |      | 22,04                 | 1,24 | 0,01 |          |      |      | 22,04                 | 1,23 | 0,00 |
|                       |          |      |      | 22,65                 | 1,24 | 0,01 |          |      |      | 22,65                 | 1,23 | 0,00 |
|                       |          |      |      | 23,27                 | 1,24 | 0,01 |          |      |      | 23,27                 | 1,24 | 0,00 |
|                       |          |      |      | 23,88                 | 1,24 | 0,01 |          |      |      | 23,88                 | 1,24 | 0,00 |
|                       |          |      |      | 24,49                 | 1,24 | 0,01 |          |      |      | 24,49                 | 1,24 | 0,00 |
|                       |          |      |      | 25,10                 | 1,24 | 0,01 |          |      |      | 25,10                 | 1,25 | 0,00 |
|                       |          |      |      | 25,71                 | 1,24 | 0,01 |          |      |      | 25,71                 | 1,25 | 0,00 |
|                       |          |      |      | 26,33                 | 1,24 | 0,01 |          |      |      | 26,33                 | 1,26 | 0,00 |
|                       |          |      |      | 26,94                 | 1,24 | 0,01 |          |      |      | 26,94                 | 1,26 | 0,00 |
|                       |          |      |      | 27,55                 | 1,23 | 0,01 |          |      |      | 27,55                 | 1,26 | 0,00 |
|                       |          |      |      | 28,16                 | 1,23 | 0,02 |          |      |      | 28,16                 | 1,27 | 0,00 |
|                       |          |      |      | 28,78                 | 1,22 | 0,02 |          |      |      | 28,78                 | 1,27 | 0,00 |
|                       |          |      |      | 29,39                 | 1,21 | 0,02 |          |      |      | 29,39                 | 1,27 | 0,01 |
|                       |          |      |      | 30,00                 | 1,19 | 0,03 |          |      |      | 30,00                 | 1,27 | 0,01 |

| Depression              |          |      |      |                       |      |      |          |      |      |                       |      |      |
|-------------------------|----------|------|------|-----------------------|------|------|----------|------|------|-----------------------|------|------|
| Log2 LDL-C/ HDL-C ratio |          |      |      |                       |      |      |          |      |      |                       |      |      |
|                         | Cases    |      |      |                       |      |      | Controls |      |      |                       |      |      |
|                         | Observed |      |      | Predicted             |      |      | Observed |      |      | Predicted             |      |      |
| Time since index date   | Number   | Mean | SD   | Time since index date | Mean | SE   | Number   | Mean | SD   | Time since index date | Mean | SE   |
| 0                       | 26       | 1,42 | 0,57 | 0,00                  | 1,34 | 0,03 | 219      | 1,31 | 0,58 | 0,00                  | 1,31 | 0,01 |
| 1                       | 40       | 1,22 | 0,62 | 0,61                  | 1,33 | 0,03 | 274      | 1,28 | 0,59 | 0,61                  | 1,30 | 0,01 |
| 2                       | 42       | 1,27 | 0,56 | 1,22                  | 1,31 | 0,02 | 329      | 1,31 | 0,55 | 1,22                  | 1,29 | 0,01 |
| 3                       | 50       | 1,34 | 0,66 | 1,84                  | 1,30 | 0,02 | 406      | 1,27 | 0,60 | 1,84                  | 1,28 | 0,01 |
| 4                       | 58       | 1,24 | 0,70 | 2,45                  | 1,29 | 0,02 | 570      | 1,26 | 0,58 | 2,45                  | 1,28 | 0,01 |
| 5                       | 113      | 1,25 | 0,63 | 3,06                  | 1,28 | 0,02 | 909      | 1,22 | 0,58 | 3,06                  | 1,27 | 0,01 |
| 6                       | 121      | 1,24 | 0,54 | 3,67                  | 1,27 | 0,02 | 1259     | 1,23 | 0,59 | 3,67                  | 1,26 | 0,01 |
| 7                       | 176      | 1,25 | 0,64 | 4,29                  | 1,26 | 0,02 | 1516     | 1,21 | 0,59 | 4,29                  | 1,25 | 0,01 |
| 8                       | 161      | 1,27 | 0,62 | 4,90                  | 1,26 | 0,02 | 1639     | 1,22 | 0,60 | 4,90                  | 1,24 | 0,01 |
| 9                       | 194      | 1,17 | 0,62 | 5,51                  | 1,25 | 0,02 | 1898     | 1,20 | 0,60 | 5,51                  | 1,24 | 0,01 |
| 10                      | 212      | 1,26 | 0,62 | 6,12                  | 1,25 | 0,02 | 2206     | 1,20 | 0,60 | 6,12                  | 1,23 | 0,01 |
| 11                      | 230      | 1,22 | 0,58 | 6,73                  | 1,24 | 0,02 | 2540     | 1,16 | 0,61 | 6,73                  | 1,22 | 0,01 |
| 12                      | 292      | 1,24 | 0,61 | 7,35                  | 1,24 | 0,01 | 2688     | 1,19 | 0,61 | 7,35                  | 1,22 | 0,00 |
| 13                      | 308      | 1,28 | 0,59 | 7,96                  | 1,24 | 0,01 | 2846     | 1,19 | 0,61 | 7,96                  | 1,21 | 0,00 |
| 14                      | 283      | 1,22 | 0,61 | 8,57                  | 1,23 | 0,01 | 2850     | 1,18 | 0,61 | 8,57                  | 1,20 | 0,00 |
| 15                      | 327      | 1,18 | 0,66 | 9,18                  | 1,23 | 0,01 | 3120     | 1,16 | 0,61 | 9,18                  | 1,20 | 0,00 |
| 16                      | 309      | 1,21 | 0,62 | 9,80                  | 1,23 | 0,01 | 3203     | 1,17 | 0,62 | 9,80                  | 1,19 | 0,00 |
| 17                      | 310      | 1,21 | 0,60 | 10,41                 | 1,23 | 0,01 | 3131     | 1,17 | 0,61 | 10,41                 | 1,19 | 0,00 |
| 18                      | 325      | 1,14 | 0,67 | 11,02                 | 1,22 | 0,01 | 3099     | 1,14 | 0,62 | 11,02                 | 1,19 | 0,00 |
| 19                      | 321      | 1,09 | 0,59 | 11,63                 | 1,22 | 0,01 | 3044     | 1,16 | 0,61 | 11,63                 | 1,18 | 0,00 |
| 20                      | 307      | 1,21 | 0,63 | 12,24                 | 1,22 | 0,01 | 2970     | 1,16 | 0,60 | 12,24                 | 1,18 | 0,00 |
| 21                      | 294      | 1,09 | 0,66 | 12,86                 | 1,21 | 0,01 | 2903     | 1,19 | 0,62 | 12,86                 | 1,18 | 0,00 |
| 22                      | 255      | 1,16 | 0,57 | 13,47                 | 1,21 | 0,01 | 2739     | 1,17 | 0,60 | 13,47                 | 1,17 | 0,00 |
| 23                      | 289      | 1,13 | 0,62 | 14,08                 | 1,21 | 0,01 | 2535     | 1,16 | 0,60 | 14,08                 | 1,17 | 0,00 |
| 24                      | 237      | 1,19 | 0,61 | 14,69                 | 1,20 | 0,01 | 2331     | 1,17 | 0,59 | 14,69                 | 1,17 | 0,00 |
| 25                      | 179      | 1,11 | 0,60 | 15,31                 | 1,20 | 0,01 | 1963     | 1,16 | 0,60 | 15,31                 | 1,17 | 0,00 |
| 26                      | 158      | 1,08 | 0,56 | 15,92                 | 1,20 | 0,01 | 1519     | 1,12 | 0,62 | 15,92                 | 1,17 | 0,00 |
| 27                      | 134      | 1,07 | 0,63 | 16,53                 | 1,19 | 0,01 | 1246     | 1,14 | 0,58 | 16,53                 | 1,17 | 0,00 |
| 28                      | 111      | 1,04 | 0,61 | 17,14                 | 1,19 | 0,01 | 1039     | 1,14 | 0,58 | 17,14                 | 1,17 | 0,00 |
| 29                      | 95       | 1,06 | 0,66 | 17,76                 | 1,18 | 0,02 | 804      | 1,15 | 0,58 | 17,76                 | 1,17 | 0,00 |
| 30                      | 51       | 0,90 | 0,68 | 18,37                 | 1,18 | 0,02 | 488      | 1,13 | 0,62 | 18,37                 | 1,16 | 0,00 |
|                         |          |      |      | 18,98                 | 1,18 | 0,02 |          |      |      | 18,98                 | 1,16 | 0,00 |
|                         |          |      |      | 19,59                 | 1,17 | 0,02 |          |      |      | 19,59                 | 1,16 | 0,00 |
|                         |          |      |      | 20,20                 | 1,17 | 0,02 |          |      |      | 20,20                 | 1,16 | 0,00 |
|                         |          |      |      | 20,82                 | 1,16 | 0,02 |          |      |      | 20,82                 | 1,16 | 0,00 |
|                         |          |      |      | 21,43                 | 1,15 | 0,02 |          |      |      | 21,43                 | 1,16 | 0,00 |
|                         |          |      |      | 22,04                 | 1,15 | 0,02 |          |      |      | 22,04                 | 1,16 | 0,00 |
|                         |          |      |      | 22,65                 | 1,14 | 0,02 |          |      |      | 22,65                 | 1,16 | 0,00 |
|                         |          |      |      | 23,27                 | 1,13 | 0,02 |          |      |      | 23,27                 | 1,16 | 0,00 |
|                         |          |      |      | 23,88                 | 1,13 | 0,02 |          |      |      | 23,88                 | 1,16 | 0,00 |
|                         |          |      |      | 24,49                 | 1,12 | 0,02 |          |      |      | 24,49                 | 1,16 | 0,00 |
|                         |          |      |      | 25,10                 | 1,11 | 0,02 |          |      |      | 25,10                 | 1,16 | 0,00 |
|                         |          |      |      | 25,71                 | 1,10 | 0,01 |          |      |      | 25,71                 | 1,15 | 0,00 |
|                         |          |      |      | 26,33                 | 1,08 | 0,01 |          |      |      | 26,33                 | 1,15 | 0,00 |
|                         |          |      |      | 26,94                 | 1,07 | 0,01 |          |      |      | 26,94                 | 1,15 | 0,00 |
|                         |          |      |      | 27,55                 | 1,05 | 0,01 |          |      |      | 27,55                 | 1,14 | 0,00 |
|                         |          |      |      | 28,16                 | 1,03 | 0,01 |          |      |      | 28,16                 | 1,14 | 0,00 |
|                         |          |      |      | 28,78                 | 1,01 | 0,01 |          |      |      | 28,78                 | 1,14 | 0,00 |
|                         |          |      |      | 29,39                 | 0,98 | 0,01 |          |      |      | 29,39                 | 1,13 | 0,01 |
|                         |          |      |      | 30,00                 | 0,95 | 0,02 |          |      |      | 30,00                 | 1,13 | 0,01 |

| Depression             |          |       |      |                       |       |      |          |       |      |                       |       |      |
|------------------------|----------|-------|------|-----------------------|-------|------|----------|-------|------|-----------------------|-------|------|
| Log2 ApoB/ApoA-I ratio |          |       |      |                       |       |      |          |       |      |                       |       |      |
|                        | Cases    |       |      |                       |       |      | Controls |       |      |                       |       |      |
|                        | Observed |       |      | Predicted             |       |      | Observed |       |      | Predicted             |       |      |
| Time since index date  | Number   | Mean  | SD   | Time since index date | Mean  | SE   | Number   | Mean  | SD   | Time since index date | Mean  | SE   |
| 0                      | 74       | -0,21 | 0,23 | 0,00                  | -0,21 | 0,02 | 692      | -0,24 | 0,49 | 0,00                  | -0,22 | 0,02 |
| 1                      | 97       | -0,25 | 0,36 | 0,61                  | -0,23 | 0,01 | 716      | -0,22 | 0,42 | 0,61                  | -0,23 | 0,01 |
| 2                      | 64       | -0,26 | 0,31 | 1,22                  | -0,25 | 0,01 | 869      | -0,26 | 0,42 | 1,22                  | -0,24 | 0,01 |
| 3                      | 105      | -0,31 | 0,47 | 1,84                  | -0,27 | 0,01 | 1060     | -0,26 | 0,43 | 1,84                  | -0,25 | 0,01 |
| 4                      | 99       | -0,26 | 0,54 | 2,45                  | -0,28 | 0,01 | 1226     | -0,25 | 0,46 | 2,45                  | -0,26 | 0,01 |
| 5                      | 182      | -0,29 | 0,45 | 3,06                  | -0,30 | 0,01 | 1794     | -0,30 | 0,44 | 3,06                  | -0,27 | 0,01 |
| 6                      | 229      | -0,33 | 0,45 | 3,67                  | -0,31 | 0,01 | 2177     | -0,32 | 0,47 | 3,67                  | -0,28 | 0,01 |
| 7                      | 276      | -0,33 | 0,50 | 4,29                  | -0,32 | 0,02 | 2629     | -0,34 | 0,51 | 4,29                  | -0,29 | 0,01 |
| 8                      | 276      | -0,42 | 0,50 | 4,90                  | -0,33 | 0,02 | 3016     | -0,34 | 0,52 | 4,90                  | -0,30 | 0,01 |
| 9                      | 319      | -0,50 | 0,56 | 5,51                  | -0,33 | 0,02 | 3462     | -0,32 | 0,49 | 5,51                  | -0,30 | 0,01 |
| 10                     | 371      | -0,27 | 0,53 | 6,12                  | -0,34 | 0,02 | 4117     | -0,34 | 0,49 | 6,12                  | -0,31 | 0,01 |
| 11                     | 331      | -0,27 | 0,49 | 6,73                  | -0,34 | 0,02 | 4382     | -0,32 | 0,50 | 6,73                  | -0,31 | 0,01 |
| 12                     | 381      | -0,38 | 0,41 | 7,35                  | -0,34 | 0,02 | 4936     | -0,32 | 0,49 | 7,35                  | -0,32 | 0,01 |
| 13                     | 463      | -0,27 | 0,47 | 7,96                  | -0,35 | 0,03 | 5339     | -0,33 | 0,50 | 7,96                  | -0,32 | 0,00 |
| 14                     | 507      | -0,24 | 0,49 | 8,57                  | -0,35 | 0,03 | 5474     | -0,31 | 0,49 | 8,57                  | -0,32 | 0,00 |
| 15                     | 540      | -0,27 | 0,54 | 9,18                  | -0,34 | 0,03 | 5704     | -0,32 | 0,48 | 9,18                  | -0,32 | 0,00 |
| 16                     | 490      | -0,26 | 0,58 | 9,80                  | -0,34 | 0,03 | 5584     | -0,30 | 0,50 | 9,80                  | -0,33 | 0,00 |
| 17                     | 622      | -0,31 | 0,46 | 10,41                 | -0,34 | 0,03 | 5521     | -0,30 | 0,49 | 10,41                 | -0,33 | 0,00 |
| 18                     | 576      | -0,26 | 0,51 | 11,02                 | -0,33 | 0,03 | 5557     | -0,31 | 0,49 | 11,02                 | -0,33 | 0,00 |
| 19                     | 561      | -0,36 | 0,49 | 11,63                 | -0,33 | 0,02 | 5500     | -0,30 | 0,49 | 11,63                 | -0,33 | 0,00 |
| 20                     | 604      | -0,27 | 0,50 | 12,24                 | -0,32 | 0,02 | 5330     | -0,30 | 0,49 | 12,24                 | -0,33 | 0,00 |
| 21                     | 506      | -0,33 | 0,47 | 12,86                 | -0,32 | 0,02 | 4978     | -0,29 | 0,49 | 12,86                 | -0,32 | 0,00 |
| 22                     | 429      | -0,21 | 0,46 | 13,47                 | -0,31 | 0,02 | 4922     | -0,29 | 0,47 | 13,47                 | -0,32 | 0,00 |
| 23                     | 503      | -0,21 | 0,46 | 14,08                 | -0,31 | 0,02 | 4519     | -0,27 | 0,46 | 14,08                 | -0,32 | 0,00 |
| 24                     | 418      | -0,26 | 0,55 | 14,69                 | -0,30 | 0,02 | 3854     | -0,29 | 0,46 | 14,69                 | -0,32 | 0,00 |
| 25                     | 360      | -0,22 | 0,52 | 15,31                 | -0,29 | 0,02 | 3165     | -0,27 | 0,45 | 15,31                 | -0,32 | 0,00 |
| 26                     | 278      | -0,29 | 0,49 | 15,92                 | -0,29 | 0,01 | 2585     | -0,24 | 0,47 | 15,92                 | -0,32 | 0,00 |
| 27                     | 245      | -0,27 | 0,54 | 16,53                 | -0,28 | 0,01 | 2067     | -0,21 | 0,44 | 16,53                 | -0,31 | 0,00 |
| 28                     | 153      | -0,44 | 0,50 | 17,14                 | -0,28 | 0,01 | 1463     | -0,21 | 0,41 | 17,14                 | -0,31 | 0,00 |
| 29                     | 120      | -0,37 | 0,47 | 17,76                 | -0,27 | 0,01 | 1124     | -0,18 | 0,39 | 17,76                 | -0,31 | 0,00 |
| 30                     | 87       | -0,41 | 0,37 | 18,37                 | -0,27 | 0,01 | 645      | -0,21 | 0,42 | 18,37                 | -0,30 | 0,00 |
|                        |          |       |      | 18,98                 | -0,26 | 0,01 |          |       |      | 18,98                 | -0,30 | 0,00 |
|                        |          |       |      | 19,59                 | -0,26 | 0,01 |          |       |      | 19,59                 | -0,30 | 0,00 |
|                        |          |       |      | 20,20                 | -0,25 | 0,01 |          |       |      | 20,20                 | -0,29 | 0,00 |
|                        |          |       |      | 20,82                 | -0,25 | 0,01 |          |       |      | 20,82                 | -0,29 | 0,00 |
|                        |          |       |      | 21,43                 | -0,25 | 0,02 |          |       |      | 21,43                 | -0,29 | 0,00 |
|                        |          |       |      | 22,04                 | -0,25 | 0,02 |          |       |      | 22,04                 | -0,28 | 0,00 |
|                        |          |       |      | 22,65                 | -0,25 | 0,02 |          |       |      | 22,65                 | -0,28 | 0,00 |
|                        |          |       |      | 23,27                 | -0,26 | 0,02 |          |       |      | 23,27                 | -0,27 | 0,00 |
|                        |          |       |      | 23,88                 | -0,26 | 0,02 |          |       |      | 23,88                 | -0,27 | 0,00 |
|                        |          |       |      | 24,49                 | -0,27 | 0,02 |          |       |      | 24,49                 | -0,26 | 0,00 |
|                        |          |       |      | 25,10                 | -0,27 | 0,02 |          |       |      | 25,10                 | -0,26 | 0,00 |
|                        |          |       |      | 25,71                 | -0,28 | 0,02 |          |       |      | 25,71                 | -0,25 | 0,00 |
|                        |          |       |      | 26,33                 | -0,30 | 0,02 |          |       |      | 26,33                 | -0,24 | 0,00 |
|                        |          |       |      | 26,94                 | -0,31 | 0,02 |          |       |      | 26,94                 | -0,23 | 0,00 |
|                        |          |       |      | 27,55                 | -0,33 | 0,02 |          |       |      | 27,55                 | -0,23 | 0,00 |
|                        |          |       |      | 28,16                 | -0,35 | 0,03 |          |       |      | 28,16                 | -0,22 | 0,00 |
|                        |          |       |      | 28,78                 | -0,37 | 0,03 |          |       |      | 28,78                 | -0,21 | 0,01 |
|                        |          |       |      | 29,39                 | -0,40 | 0,04 |          |       |      | 29,39                 | -0,20 | 0,01 |
|                        |          |       |      | 30,00                 | -0,42 | 0,06 |          |       |      | 30,00                 | -0,19 | 0,01 |

| Anxiety               |          |      |      |                       |      |      |          |      |      |                       |      |      |
|-----------------------|----------|------|------|-----------------------|------|------|----------|------|------|-----------------------|------|------|
| Glucose               |          |      |      |                       |      |      |          |      |      |                       |      |      |
|                       | Cases    |      |      |                       |      |      | Controls |      |      |                       |      |      |
|                       | Observed |      |      | Predicted             |      |      | Observed |      |      | Predicted             |      |      |
| Time since index date | Number   | Mean | SD   | Time since index date | Mean | SE   | Number   | Mean | SD   | Time since index date | Mean | SE   |
| 0                     | 12       | 5,55 | 1,81 | 0,00                  | 5,77 | 0,34 | 143      | 5,11 | 0,84 | 0,00                  | 5,09 | 0,03 |
| 1                     | 15       | 5,89 | 1,86 | 0,61                  | 5,71 | 0,25 | 197      | 5,10 | 0,96 | 0,61                  | 5,09 | 0,02 |
| 2                     | 26       | 5,42 | 1,24 | 1,22                  | 5,65 | 0,20 | 264      | 5,03 | 0,83 | 1,22                  | 5,09 | 0,02 |
| 3                     | 33       | 6,14 | 3,13 | 1,84                  | 5,60 | 0,16 | 423      | 5,08 | 1,17 | 1,84                  | 5,08 | 0,01 |
| 4                     | 49       | 5,23 | 1,11 | 2,45                  | 5,54 | 0,14 | 640      | 5,08 | 1,26 | 2,45                  | 5,08 | 0,01 |
| 5                     | 106      | 5,19 | 1,06 | 3,06                  | 5,49 | 0,13 | 988      | 5,03 | 1,13 | 3,06                  | 5,07 | 0,01 |
| 6                     | 138      | 5,02 | 1,03 | 3,67                  | 5,43 | 0,13 | 1498     | 5,04 | 1,20 | 3,67                  | 5,07 | 0,01 |
| 7                     | 193      | 5,14 | 1,31 | 4,29                  | 5,39 | 0,12 | 1943     | 5,02 | 1,04 | 4,29                  | 5,06 | 0,01 |
| 8                     | 197      | 5,04 | 0,87 | 4,90                  | 5,34 | 0,11 | 2383     | 4,99 | 1,06 | 4,90                  | 5,05 | 0,01 |
| 9                     | 303      | 5,32 | 2,24 | 5,51                  | 5,29 | 0,10 | 2993     | 5,00 | 1,11 | 5,51                  | 5,04 | 0,01 |
| 10                    | 373      | 5,09 | 1,61 | 6,12                  | 5,25 | 0,09 | 3572     | 4,97 | 1,07 | 6,12                  | 5,03 | 0,01 |
| 11                    | 420      | 4,96 | 1,03 | 6,73                  | 5,22 | 0,08 | 4293     | 4,98 | 1,25 | 6,73                  | 5,02 | 0,01 |
| 12                    | 500      | 5,00 | 1,25 | 7,35                  | 5,18 | 0,07 | 5011     | 4,94 | 1,03 | 7,35                  | 5,01 | 0,01 |
| 13                    | 597      | 4,99 | 1,12 | 7,96                  | 5,15 | 0,06 | 5582     | 4,94 | 1,14 | 7,96                  | 5,00 | 0,01 |
| 14                    | 660      | 4,93 | 1,12 | 8,57                  | 5,12 | 0,05 | 6137     | 4,90 | 1,00 | 8,57                  | 4,99 | 0,01 |
| 15                    | 715      | 5,02 | 1,25 | 9,18                  | 5,09 | 0,05 | 6773     | 4,88 | 0,96 | 9,18                  | 4,98 | 0,00 |
| 16                    | 704      | 4,86 | 0,84 | 9,80                  | 5,06 | 0,05 | 6863     | 4,86 | 0,91 | 9,80                  | 4,97 | 0,00 |
| 17                    | 764      | 4,94 | 1,33 | 10,41                 | 5,04 | 0,04 | 7381     | 4,86 | 1,00 | 10,41                 | 4,96 | 0,00 |
| 18                    | 774      | 4,80 | 0,72 | 11,02                 | 5,02 | 0,04 | 7753     | 4,86 | 1,00 | 11,02                 | 4,95 | 0,00 |
| 19                    | 836      | 4,85 | 0,92 | 11,63                 | 5,00 | 0,03 | 7768     | 4,86 | 1,00 | 11,63                 | 4,94 | 0,00 |
| 20                    | 814      | 4,81 | 0,67 | 12,24                 | 4,98 | 0,03 | 7884     | 4,85 | 0,96 | 12,24                 | 4,93 | 0,00 |
| 21                    | 780      | 4,86 | 1,00 | 12,86                 | 4,97 | 0,03 | 7739     | 4,85 | 0,92 | 12,86                 | 4,92 | 0,00 |
| 22                    | 796      | 4,82 | 0,85 | 13,47                 | 4,95 | 0,03 | 7796     | 4,87 | 0,95 | 13,47                 | 4,92 | 0,00 |
| 23                    | 772      | 4,87 | 1,03 | 14,08                 | 4,94 | 0,03 | 7697     | 4,86 | 1,03 | 14,08                 | 4,91 | 0,00 |
| 24                    | 683      | 4,79 | 0,88 | 14,69                 | 4,93 | 0,02 | 6918     | 4,83 | 1,00 | 14,69                 | 4,90 | 0,00 |
| 25                    | 601      | 4,84 | 1,19 | 15,31                 | 4,92 | 0,02 | 6245     | 4,82 | 0,95 | 15,31                 | 4,89 | 0,00 |
| 26                    | 553      | 4,80 | 1,05 | 15,92                 | 4,91 | 0,02 | 5420     | 4,78 | 0,91 | 15,92                 | 4,89 | 0,00 |
| 27                    | 484      | 4,74 | 0,71 | 16,53                 | 4,90 | 0,02 | 4620     | 4,74 | 0,92 | 16,53                 | 4,88 | 0,00 |
| 28                    | 448      | 4,74 | 0,80 | 17,14                 | 4,89 | 0,02 | 4075     | 4,73 | 0,84 | 17,14                 | 4,88 | 0,00 |
| 29                    | 332      | 4,70 | 0,62 | 17,76                 | 4,88 | 0,02 | 3319     | 4,72 | 0,88 | 17,76                 | 4,87 | 0,00 |
| 30                    | 290      | 4,74 | 0,72 | 18,37                 | 4,87 | 0,02 | 2604     | 4,72 | 0,84 | 18,37                 | 4,87 | 0,00 |
|                       |          |      |      | 18,98                 | 4,87 | 0,02 |          |      |      | 18,98                 | 4,86 | 0,00 |
|                       |          |      |      | 19,59                 | 4,86 | 0,02 |          |      |      | 19,59                 | 4,86 | 0,00 |
|                       |          |      |      | 20,20                 | 4,85 | 0,01 |          |      |      | 20,20                 | 4,85 | 0,00 |
|                       |          |      |      | 20,82                 | 4,85 | 0,01 |          |      |      | 20,82                 | 4,85 | 0,00 |
|                       |          |      |      | 21,43                 | 4,84 | 0,01 |          |      |      | 21,43                 | 4,84 | 0,00 |
|                       |          |      |      | 22,04                 | 4,83 | 0,01 |          |      |      | 22,04                 | 4,84 | 0,00 |
|                       |          |      |      | 22,65                 | 4,83 | 0,01 |          |      |      | 22,65                 | 4,83 | 0,00 |
|                       |          |      |      | 23,27                 | 4,82 | 0,01 |          |      |      | 23,27                 | 4,83 | 0,00 |
|                       |          |      |      | 23,88                 | 4,81 | 0,01 |          |      |      | 23,88                 | 4,82 | 0,00 |
|                       |          |      |      | 24,49                 | 4,80 | 0,01 |          |      |      | 24,49                 | 4,81 | 0,00 |
|                       |          |      |      | 25,10                 | 4,79 | 0,01 |          |      |      | 25,10                 | 4,80 | 0,00 |
|                       |          |      |      | 25,71                 | 4,79 | 0,01 |          |      |      | 25,71                 | 4,80 | 0,00 |
|                       |          |      |      | 26,33                 | 4,78 | 0,01 |          |      |      | 26,33                 | 4,79 | 0,00 |
|                       |          |      |      | 26,94                 | 4,77 | 0,01 |          |      |      | 26,94                 | 4,77 | 0,00 |
|                       |          |      |      | 27,55                 | 4,76 | 0,01 |          |      |      | 27,55                 | 4,76 | 0,00 |
|                       |          |      |      | 28,16                 | 4,75 | 0,01 |          |      |      | 28,16                 | 4,75 | 0,00 |
|                       |          |      |      | 28,78                 | 4,74 | 0,01 |          |      |      | 28,78                 | 4,73 | 0,00 |
|                       |          |      |      | 29,39                 | 4,73 | 0,02 |          |      |      | 29,39                 | 4,71 | 0,01 |
|                       |          |      |      | 30,00                 | 4,71 | 0,02 |          |      |      | 30,00                 | 4,69 | 0,01 |

| Anxiety               |          |      |      |                       |      |      |          |      |      |                       |      |      |
|-----------------------|----------|------|------|-----------------------|------|------|----------|------|------|-----------------------|------|------|
| Total Cholesterol     |          |      |      |                       |      |      |          |      |      |                       |      |      |
|                       | Cases    |      |      |                       |      |      | Controls |      |      |                       |      |      |
|                       | Observed |      |      | Predicted             |      |      | Observed |      |      | Predicted             |      |      |
| Time since index date | Number   | Mean | SD   | Time since index date | Mean | SE   | Number   | Mean | SD   | Time since index date | Mean | SE   |
| 0                     | 15       | 5,96 | 1,46 | 0,00                  | 5,81 | 0,04 | 153      | 5,71 | 1,10 | 0,00                  | 5,69 | 0,02 |
| 1                     | 15       | 5,55 | 0,98 | 0,61                  | 5,81 | 0,04 | 211      | 5,69 | 1,05 | 0,61                  | 5,69 | 0,02 |
| 2                     | 27       | 5,73 | 1,18 | 1,22                  | 5,81 | 0,03 | 286      | 5,64 | 1,12 | 1,22                  | 5,68 | 0,01 |
| 3                     | 33       | 5,94 | 1,24 | 1,84                  | 5,81 | 0,03 | 434      | 5,63 | 1,07 | 1,84                  | 5,67 | 0,01 |
| 4                     | 52       | 5,93 | 1,68 | 2,45                  | 5,80 | 0,04 | 678      | 5,67 | 1,17 | 2,45                  | 5,66 | 0,01 |
| 5                     | 126      | 5,79 | 1,12 | 3,06                  | 5,79 | 0,04 | 1059     | 5,61 | 1,11 | 3,06                  | 5,65 | 0,01 |
| 6                     | 145      | 5,52 | 1,15 | 3,67                  | 5,78 | 0,05 | 1581     | 5,59 | 1,17 | 3,67                  | 5,64 | 0,01 |
| 7                     | 217      | 5,81 | 1,36 | 4,29                  | 5,77 | 0,05 | 2036     | 5,58 | 1,17 | 4,29                  | 5,63 | 0,01 |
| 8                     | 207      | 5,65 | 1,21 | 4,90                  | 5,76 | 0,05 | 2536     | 5,59 | 1,18 | 4,90                  | 5,62 | 0,01 |
| 9                     | 330      | 5,57 | 1,22 | 5,51                  | 5,74 | 0,06 | 3181     | 5,56 | 1,16 | 5,51                  | 5,61 | 0,01 |
| 10                    | 391      | 5,62 | 1,11 | 6,12                  | 5,72 | 0,05 | 3751     | 5,53 | 1,14 | 6,12                  | 5,60 | 0,01 |
| 11                    | 455      | 5,65 | 1,22 | 6,73                  | 5,71 | 0,05 | 4541     | 5,52 | 1,16 | 6,73                  | 5,59 | 0,01 |
| 12                    | 538      | 5,54 | 1,15 | 7,35                  | 5,69 | 0,05 | 5281     | 5,53 | 1,16 | 7,35                  | 5,58 | 0,01 |
| 13                    | 624      | 5,55 | 1,15 | 7,96                  | 5,67 | 0,04 | 5892     | 5,51 | 1,17 | 7,96                  | 5,57 | 0,01 |
| 14                    | 682      | 5,51 | 1,19 | 8,57                  | 5,66 | 0,04 | 6459     | 5,51 | 1,15 | 8,57                  | 5,56 | 0,01 |
| 15                    | 762      | 5,59 | 1,24 | 9,18                  | 5,64 | 0,03 | 7117     | 5,48 | 1,11 | 9,18                  | 5,55 | 0,01 |
| 16                    | 743      | 5,54 | 1,12 | 9,80                  | 5,62 | 0,03 | 7242     | 5,49 | 1,14 | 9,80                  | 5,54 | 0,00 |
| 17                    | 810      | 5,56 | 1,17 | 10,41                 | 5,61 | 0,02 | 7806     | 5,47 | 1,13 | 10,41                 | 5,53 | 0,00 |
| 18                    | 825      | 5,47 | 1,17 | 11,02                 | 5,60 | 0,02 | 8161     | 5,47 | 1,12 | 11,02                 | 5,52 | 0,00 |
| 19                    | 884      | 5,52 | 1,20 | 11,63                 | 5,58 | 0,02 | 8161     | 5,46 | 1,14 | 11,63                 | 5,52 | 0,00 |
| 20                    | 850      | 5,53 | 1,15 | 12,24                 | 5,57 | 0,02 | 8284     | 5,46 | 1,14 | 12,24                 | 5,51 | 0,00 |
| 21                    | 825      | 5,57 | 1,12 | 12,86                 | 5,56 | 0,02 | 8136     | 5,50 | 1,14 | 12,86                 | 5,50 | 0,00 |
| 22                    | 837      | 5,55 | 1,15 | 13,47                 | 5,55 | 0,02 | 8180     | 5,49 | 1,15 | 13,47                 | 5,50 | 0,00 |
| 23                    | 814      | 5,52 | 1,16 | 14,08                 | 5,54 | 0,02 | 8082     | 5,52 | 1,15 | 14,08                 | 5,49 | 0,00 |
| 24                    | 719      | 5,55 | 1,10 | 14,69                 | 5,54 | 0,01 | 7291     | 5,50 | 1,13 | 14,69                 | 5,49 | 0,00 |
| 25                    | 633      | 5,55 | 1,10 | 15,31                 | 5,53 | 0,01 | 6547     | 5,52 | 1,14 | 15,31                 | 5,49 | 0,00 |
| 26                    | 570      | 5,49 | 1,19 | 15,92                 | 5,53 | 0,01 | 5695     | 5,53 | 1,17 | 15,92                 | 5,48 | 0,00 |
| 27                    | 507      | 5,54 | 1,15 | 16,53                 | 5,53 | 0,01 | 4802     | 5,49 | 1,09 | 16,53                 | 5,48 | 0,00 |
| 28                    | 460      | 5,53 | 1,21 | 17,14                 | 5,52 | 0,01 | 4261     | 5,51 | 1,11 | 17,14                 | 5,48 | 0,00 |
| 29                    | 351      | 5,44 | 1,18 | 17,76                 | 5,52 | 0,01 | 3425     | 5,50 | 1,15 | 17,76                 | 5,48 | 0,00 |
| 30                    | 298      | 5,50 | 1,17 | 18,37                 | 5,52 | 0,01 | 2686     | 5,47 | 1,15 | 18,37                 | 5,48 | 0,00 |
|                       |          |      |      | 18,98                 | 5,52 | 0,01 |          |      |      | 18,98                 | 5,48 | 0,00 |
|                       |          |      |      | 19,59                 | 5,52 | 0,01 |          |      |      | 19,59                 | 5,48 | 0,00 |
|                       |          |      |      | 20,20                 | 5,53 | 0,01 |          |      |      | 20,20                 | 5,49 | 0,00 |
|                       |          |      |      | 20,82                 | 5,53 | 0,01 |          |      |      | 20,82                 | 5,49 | 0,00 |
|                       |          |      |      | 21,43                 | 5,53 | 0,01 |          |      |      | 21,43                 | 5,49 | 0,00 |
|                       |          |      |      | 22,04                 | 5,53 | 0,01 |          |      |      | 22,04                 | 5,50 | 0,00 |
|                       |          |      |      | 22,65                 | 5,54 | 0,01 |          |      |      | 22,65                 | 5,50 | 0,01 |
|                       |          |      |      | 23,27                 | 5,54 | 0,01 |          |      |      | 23,27                 | 5,50 | 0,01 |
|                       |          |      |      | 23,88                 | 5,54 | 0,01 |          |      |      | 23,88                 | 5,51 | 0,01 |
|                       |          |      |      | 24,49                 | 5,54 | 0,01 |          |      |      | 24,49                 | 5,51 | 0,01 |
|                       |          |      |      | 25,10                 | 5,54 | 0,01 |          |      |      | 25,10                 | 5,51 | 0,01 |
|                       |          |      |      | 25,71                 | 5,54 | 0,01 |          |      |      | 25,71                 | 5,51 | 0,01 |
|                       |          |      |      | 26,33                 | 5,53 | 0,01 |          |      |      | 26,33                 | 5,51 | 0,01 |
|                       |          |      |      | 26,94                 | 5,53 | 0,01 |          |      |      | 26,94                 | 5,51 | 0,01 |
|                       |          |      |      | 27,55                 | 5,52 | 0,02 |          |      |      | 27,55                 | 5,51 | 0,01 |
|                       |          |      |      | 28,16                 | 5,51 | 0,02 |          |      |      | 28,16                 | 5,50 | 0,01 |
|                       |          |      |      | 28,78                 | 5,50 | 0,02 |          |      |      | 28,78                 | 5,50 | 0,01 |
|                       |          |      |      | 29,39                 | 5,48 | 0,02 |          |      |      | 29,39                 | 5,49 | 0,01 |
|                       |          |      |      | 30,00                 | 5,47 | 0,03 |          |      |      | 30,00                 | 5,48 | 0,01 |

| Anxiety               |          |       |      |                       |       |      |          |       |      |                       |       |      |
|-----------------------|----------|-------|------|-----------------------|-------|------|----------|-------|------|-----------------------|-------|------|
| Log2 Triglyceriders   |          |       |      |                       |       |      |          |       |      |                       |       |      |
|                       | Cases    |       |      |                       |       |      | Controls |       |      |                       |       |      |
|                       | Observed |       |      | Predicted             |       |      | Observed |       |      | Predicted             |       |      |
| Time since index date | Number   | Mean  | SD   | Time since index date | Mean  | SE   | Number   | Mean  | SD   | Time since index date | Mean  | SE   |
| 0                     | 15       | 0,70  | 1,19 | 0,00                  | 0,54  | 0,05 | 153      | 0,02  | 0,76 | 0,00                  | 0,11  | 0,01 |
| 1                     | 15       | 0,24  | 0,71 | 0,61                  | 0,51  | 0,04 | 210      | 0,23  | 0,82 | 0,61                  | 0,12  | 0,01 |
| 2                     | 27       | 0,45  | 0,85 | 1,22                  | 0,48  | 0,03 | 284      | 0,19  | 0,79 | 1,22                  | 0,13  | 0,01 |
| 3                     | 33       | 0,45  | 0,79 | 1,84                  | 0,45  | 0,03 | 433      | 0,13  | 0,80 | 1,84                  | 0,14  | 0,01 |
| 4                     | 52       | 0,40  | 0,91 | 2,45                  | 0,43  | 0,03 | 674      | 0,12  | 0,81 | 2,45                  | 0,15  | 0,01 |
| 5                     | 124      | 0,33  | 0,76 | 3,06                  | 0,40  | 0,03 | 1044     | 0,12  | 0,81 | 3,06                  | 0,15  | 0,01 |
| 6                     | 145      | 0,26  | 0,83 | 3,67                  | 0,38  | 0,03 | 1568     | 0,17  | 0,83 | 3,67                  | 0,15  | 0,01 |
| 7                     | 217      | 0,35  | 0,90 | 4,29                  | 0,36  | 0,03 | 2022     | 0,12  | 0,79 | 4,29                  | 0,15  | 0,01 |
| 8                     | 206      | 0,25  | 0,81 | 4,90                  | 0,34  | 0,03 | 2505     | 0,13  | 0,82 | 4,90                  | 0,15  | 0,01 |
| 9                     | 323      | 0,23  | 0,77 | 5,51                  | 0,32  | 0,03 | 3162     | 0,13  | 0,81 | 5,51                  | 0,15  | 0,01 |
| 10                    | 386      | 0,24  | 0,82 | 6,12                  | 0,30  | 0,02 | 3728     | 0,11  | 0,83 | 6,12                  | 0,14  | 0,01 |
| 11                    | 447      | 0,23  | 0,88 | 6,73                  | 0,29  | 0,02 | 4503     | 0,10  | 0,82 | 6,73                  | 0,14  | 0,01 |
| 12                    | 530      | 0,16  | 0,81 | 7,35                  | 0,27  | 0,02 | 5249     | 0,08  | 0,81 | 7,35                  | 0,13  | 0,01 |
| 13                    | 614      | 0,11  | 0,84 | 7,96                  | 0,26  | 0,02 | 5868     | 0,07  | 0,80 | 7,96                  | 0,13  | 0,01 |
| 14                    | 678      | 0,13  | 0,85 | 8,57                  | 0,24  | 0,01 | 6433     | 0,07  | 0,80 | 8,57                  | 0,12  | 0,01 |
| 15                    | 751      | 0,14  | 0,82 | 9,18                  | 0,23  | 0,01 | 7084     | 0,04  | 0,81 | 9,18                  | 0,12  | 0,00 |
| 16                    | 738      | 0,11  | 0,79 | 9,80                  | 0,22  | 0,01 | 7201     | 0,05  | 0,80 | 9,80                  | 0,11  | 0,00 |
| 17                    | 804      | 0,17  | 0,85 | 10,41                 | 0,20  | 0,01 | 7752     | 0,04  | 0,80 | 10,41                 | 0,10  | 0,00 |
| 18                    | 812      | 0,08  | 0,82 | 11,02                 | 0,19  | 0,01 | 8125     | 0,05  | 0,81 | 11,02                 | 0,10  | 0,00 |
| 19                    | 871      | 0,08  | 0,79 | 11,63                 | 0,18  | 0,01 | 8110     | 0,04  | 0,81 | 11,63                 | 0,09  | 0,00 |
| 20                    | 848      | 0,08  | 0,86 | 12,24                 | 0,17  | 0,01 | 8240     | 0,04  | 0,79 | 12,24                 | 0,08  | 0,00 |
| 21                    | 816      | 0,10  | 0,83 | 12,86                 | 0,16  | 0,01 | 8092     | 0,05  | 0,80 | 12,86                 | 0,08  | 0,00 |
| 22                    | 835      | 0,06  | 0,80 | 13,47                 | 0,15  | 0,01 | 8147     | 0,04  | 0,79 | 13,47                 | 0,07  | 0,00 |
| 23                    | 808      | 0,09  | 0,79 | 14,08                 | 0,15  | 0,01 | 8042     | 0,04  | 0,80 | 14,08                 | 0,07  | 0,00 |
| 24                    | 718      | 0,07  | 0,75 | 14,69                 | 0,14  | 0,01 | 7270     | 0,03  | 0,79 | 14,69                 | 0,06  | 0,00 |
| 25                    | 633      | 0,08  | 0,76 | 15,31                 | 0,13  | 0,01 | 6521     | 0,02  | 0,80 | 15,31                 | 0,06  | 0,00 |
| 26                    | 568      | 0,07  | 0,83 | 15,92                 | 0,13  | 0,01 | 5679     | 0,00  | 0,80 | 15,92                 | 0,05  | 0,00 |
| 27                    | 505      | 0,03  | 0,82 | 16,53                 | 0,12  | 0,01 | 4798     | -0,01 | 0,80 | 16,53                 | 0,05  | 0,00 |
| 28                    | 460      | 0,03  | 0,77 | 17,14                 | 0,11  | 0,01 | 4248     | 0,01  | 0,78 | 17,14                 | 0,05  | 0,00 |
| 29                    | 351      | -0,06 | 0,70 | 17,76                 | 0,11  | 0,01 | 3422     | -0,01 | 0,79 | 17,76                 | 0,04  | 0,00 |
| 30                    | 297      | 0,04  | 0,76 | 18,37                 | 0,10  | 0,01 | 2685     | 0,02  | 0,79 | 18,37                 | 0,04  | 0,00 |
|                       |          |       |      | 18,98                 | 0,10  | 0,01 |          |       |      | 18,98                 | 0,04  | 0,00 |
|                       |          |       |      | 19,59                 | 0,09  | 0,01 |          |       |      | 19,59                 | 0,04  | 0,00 |
|                       |          |       |      | 20,20                 | 0,09  | 0,01 |          |       |      | 20,20                 | 0,03  | 0,00 |
|                       |          |       |      | 20,82                 | 0,09  | 0,01 |          |       |      | 20,82                 | 0,03  | 0,00 |
|                       |          |       |      | 21,43                 | 0,08  | 0,01 |          |       |      | 21,43                 | 0,03  | 0,00 |
|                       |          |       |      | 22,04                 | 0,08  | 0,01 |          |       |      | 22,04                 | 0,03  | 0,00 |
|                       |          |       |      | 22,65                 | 0,08  | 0,01 |          |       |      | 22,65                 | 0,03  | 0,00 |
|                       |          |       |      | 23,27                 | 0,07  | 0,01 |          |       |      | 23,27                 | 0,03  | 0,00 |
|                       |          |       |      | 23,88                 | 0,07  | 0,01 |          |       |      | 23,88                 | 0,03  | 0,00 |
|                       |          |       |      | 24,49                 | 0,06  | 0,01 |          |       |      | 24,49                 | 0,02  | 0,00 |
|                       |          |       |      | 25,10                 | 0,06  | 0,01 |          |       |      | 25,10                 | 0,02  | 0,00 |
|                       |          |       |      | 25,71                 | 0,05  | 0,01 |          |       |      | 25,71                 | 0,02  | 0,00 |
|                       |          |       |      | 26,33                 | 0,05  | 0,01 |          |       |      | 26,33                 | 0,02  | 0,00 |
|                       |          |       |      | 26,94                 | 0,04  | 0,01 |          |       |      | 26,94                 | 0,01  | 0,00 |
|                       |          |       |      | 27,55                 | 0,03  | 0,01 |          |       |      | 27,55                 | 0,01  | 0,01 |
|                       |          |       |      | 28,16                 | 0,02  | 0,01 |          |       |      | 28,16                 | 0,01  | 0,01 |
|                       |          |       |      | 28,78                 | 0,01  | 0,02 |          |       |      | 28,78                 | 0,00  | 0,01 |
|                       |          |       |      | 29,39                 | 0,00  | 0,02 |          |       |      | 29,39                 | 0,00  | 0,01 |
|                       |          |       |      | 30,00                 | -0,01 | 0,03 |          |       |      | 30,00                 | -0,01 | 0,01 |

| Anxiety               |          |      |      |                       |      |      |          |      |      |                       |      |      |
|-----------------------|----------|------|------|-----------------------|------|------|----------|------|------|-----------------------|------|------|
| LDL-C                 |          |      |      |                       |      |      |          |      |      |                       |      |      |
|                       | Cases    |      |      |                       |      |      | Controls |      |      |                       |      |      |
|                       | Observed |      |      | Predicted             |      |      | Observed |      |      | Predicted             |      |      |
| Time since index date | Number   | Mean | SD   | Time since index date | Mean | SE   | Number   | Mean | SD   | Time since index date | Mean | SE   |
| 0                     | 7        | 4,06 | 1,02 | 0,00                  | 3,98 | 0,18 | 65       | 3,62 | 0,95 | 0,00                  | 3,60 | 0,03 |
| 1                     | 5        | 3,78 | 0,71 | 0,61                  | 3,94 | 0,14 | 85       | 3,62 | 0,99 | 0,61                  | 3,61 | 0,02 |
| 2                     | 9        | 3,64 | 0,92 | 1,22                  | 3,90 | 0,11 | 111      | 3,62 | 1,14 | 1,22                  | 3,63 | 0,02 |
| 3                     | 11       | 4,19 | 1,07 | 1,84                  | 3,86 | 0,10 | 168      | 3,60 | 0,99 | 1,84                  | 3,64 | 0,02 |
| 4                     | 25       | 3,80 | 0,86 | 2,45                  | 3,83 | 0,09 | 263      | 3,70 | 1,06 | 2,45                  | 3,64 | 0,01 |
| 5                     | 54       | 3,69 | 1,14 | 3,06                  | 3,80 | 0,09 | 399      | 3,63 | 1,04 | 3,06                  | 3,65 | 0,01 |
| 6                     | 63       | 3,50 | 1,12 | 3,67                  | 3,77 | 0,09 | 616      | 3,63 | 1,13 | 3,67                  | 3,65 | 0,01 |
| 7                     | 98       | 3,87 | 1,19 | 4,29                  | 3,75 | 0,09 | 772      | 3,64 | 1,09 | 4,29                  | 3,65 | 0,01 |
| 8                     | 75       | 3,53 | 1,13 | 4,90                  | 3,72 | 0,08 | 960      | 3,59 | 1,09 | 4,90                  | 3,64 | 0,01 |
| 9                     | 132      | 3,56 | 1,15 | 5,51                  | 3,70 | 0,08 | 1183     | 3,59 | 1,06 | 5,51                  | 3,64 | 0,01 |
| 10                    | 143      | 3,58 | 1,08 | 6,12                  | 3,68 | 0,07 | 1442     | 3,57 | 1,06 | 6,12                  | 3,63 | 0,01 |
| 11                    | 137      | 3,69 | 1,03 | 6,73                  | 3,67 | 0,07 | 1721     | 3,54 | 1,08 | 6,73                  | 3,62 | 0,01 |
| 12                    | 190      | 3,54 | 0,99 | 7,35                  | 3,65 | 0,06 | 1884     | 3,60 | 1,10 | 7,35                  | 3,62 | 0,01 |
| 13                    | 199      | 3,56 | 1,06 | 7,96                  | 3,64 | 0,06 | 2126     | 3,55 | 1,13 | 7,96                  | 3,61 | 0,01 |
| 14                    | 213      | 3,51 | 1,05 | 8,57                  | 3,63 | 0,05 | 2229     | 3,56 | 1,10 | 8,57                  | 3,60 | 0,01 |
| 15                    | 222      | 3,82 | 1,20 | 9,18                  | 3,62 | 0,05 | 2398     | 3,48 | 1,04 | 9,18                  | 3,59 | 0,01 |
| 16                    | 274      | 3,56 | 1,05 | 9,80                  | 3,62 | 0,04 | 2499     | 3,54 | 1,08 | 9,80                  | 3,58 | 0,01 |
| 17                    | 257      | 3,58 | 1,13 | 10,41                 | 3,61 | 0,04 | 2625     | 3,51 | 1,07 | 10,41                 | 3,57 | 0,01 |
| 18                    | 262      | 3,57 | 1,13 | 11,02                 | 3,61 | 0,04 | 2772     | 3,50 | 1,05 | 11,02                 | 3,56 | 0,01 |
| 19                    | 273      | 3,57 | 1,07 | 11,63                 | 3,60 | 0,04 | 2740     | 3,51 | 1,08 | 11,63                 | 3,55 | 0,01 |
| 20                    | 271      | 3,53 | 1,06 | 12,24                 | 3,60 | 0,04 | 2645     | 3,52 | 1,10 | 12,24                 | 3,55 | 0,01 |
| 21                    | 269      | 3,70 | 1,11 | 12,86                 | 3,60 | 0,04 | 2563     | 3,57 | 1,08 | 12,86                 | 3,54 | 0,01 |
| 22                    | 260      | 3,63 | 1,13 | 13,47                 | 3,60 | 0,04 | 2557     | 3,55 | 1,10 | 13,47                 | 3,54 | 0,01 |
| 23                    | 273      | 3,52 | 1,08 | 14,08                 | 3,60 | 0,04 | 2651     | 3,57 | 1,09 | 14,08                 | 3,53 | 0,01 |
| 24                    | 215      | 3,59 | 1,14 | 14,69                 | 3,60 | 0,04 | 2301     | 3,54 | 1,09 | 14,69                 | 3,53 | 0,01 |
| 25                    | 176      | 3,52 | 1,04 | 15,31                 | 3,60 | 0,04 | 1994     | 3,53 | 1,05 | 15,31                 | 3,52 | 0,01 |
| 26                    | 161      | 3,33 | 1,00 | 15,92                 | 3,60 | 0,04 | 1653     | 3,61 | 1,17 | 15,92                 | 3,52 | 0,01 |
| 27                    | 156      | 3,64 | 1,13 | 16,53                 | 3,59 | 0,03 | 1310     | 3,58 | 1,05 | 16,53                 | 3,52 | 0,01 |
| 28                    | 125      | 3,55 | 1,16 | 17,14                 | 3,59 | 0,03 | 1111     | 3,54 | 1,10 | 17,14                 | 3,52 | 0,01 |
| 29                    | 103      | 3,47 | 1,12 | 17,76                 | 3,59 | 0,03 | 907      | 3,49 | 1,10 | 17,76                 | 3,52 | 0,01 |
| 30                    | 66       | 3,53 | 1,31 | 18,37                 | 3,59 | 0,03 | 587      | 3,50 | 1,04 | 18,37                 | 3,52 | 0,01 |
|                       |          |      |      | 18,98                 | 3,59 | 0,03 |          |      |      | 18,98                 | 3,53 | 0,01 |
|                       |          |      |      | 19,59                 | 3,59 | 0,03 |          |      |      | 19,59                 | 3,53 | 0,01 |
|                       |          |      |      | 20,20                 | 3,58 | 0,03 |          |      |      | 20,20                 | 3,54 | 0,01 |
|                       |          |      |      | 20,82                 | 3,58 | 0,03 |          |      |      | 20,82                 | 3,54 | 0,01 |
|                       |          |      |      | 21,43                 | 3,57 | 0,03 |          |      |      | 21,43                 | 3,55 | 0,01 |
|                       |          |      |      | 22,04                 | 3,57 | 0,03 |          |      |      | 22,04                 | 3,55 | 0,01 |
|                       |          |      |      | 22,65                 | 3,56 | 0,03 |          |      |      | 22,65                 | 3,55 | 0,01 |
|                       |          |      |      | 23,27                 | 3,56 | 0,03 |          |      |      | 23,27                 | 3,56 | 0,01 |
|                       |          |      |      | 23,88                 | 3,55 | 0,04 |          |      |      | 23,88                 | 3,56 | 0,01 |
|                       |          |      |      | 24,49                 | 3,55 | 0,04 |          |      |      | 24,49                 | 3,57 | 0,01 |
|                       |          |      |      | 25,10                 | 3,54 | 0,04 |          |      |      | 25,10                 | 3,57 | 0,01 |
|                       |          |      |      | 25,71                 | 3,53 | 0,04 |          |      |      | 25,71                 | 3,57 | 0,01 |
|                       |          |      |      | 26,33                 | 3,53 | 0,04 |          |      |      | 26,33                 | 3,56 | 0,01 |
|                       |          |      |      | 26,94                 | 3,52 | 0,04 |          |      |      | 26,94                 | 3,56 | 0,01 |
|                       |          |      |      | 27,55                 | 3,52 | 0,05 |          |      |      | 27,55                 | 3,55 | 0,01 |
|                       |          |      |      | 28,16                 | 3,51 | 0,05 |          |      |      | 28,16                 | 3,54 | 0,01 |
|                       |          |      |      | 28,78                 | 3,51 | 0,06 |          |      |      | 28,78                 | 3,53 | 0,01 |
|                       |          |      |      | 29,39                 | 3,51 | 0,07 |          |      |      | 29,39                 | 3,51 | 0,01 |
|                       |          |      |      | 30,00                 | 3,51 | 0,09 |          |      |      | 30,00                 | 3,49 | 0,02 |

| Anxiety               |          |      |      |                       |      |      |          |      |      |                       |      |      |
|-----------------------|----------|------|------|-----------------------|------|------|----------|------|------|-----------------------|------|------|
| HDL-C                 |          |      |      |                       |      |      |          |      |      |                       |      |      |
| Time since index date | Cases    |      |      |                       |      |      | Controls |      |      |                       |      |      |
|                       | Observed |      |      | Predicted             |      |      | Observed |      |      | Predicted             |      |      |
|                       | Number   | Mean | SD   | Time since index date | Mean | SE   | Number   | Mean | SD   | Time since index date | Mean | SE   |
| 0                     | 7        | 1,22 | 0,23 | 0,00                  | 1,36 | 0,04 | 69       | 1,65 | 0,42 | 0,00                  | 1,61 | 0,02 |
| 1                     | 5        | 1,53 | 0,29 | 0,61                  | 1,41 | 0,03 | 85       | 1,55 | 0,41 | 0,61                  | 1,60 | 0,02 |
| 2                     | 8        | 1,57 | 0,30 | 1,22                  | 1,44 | 0,03 | 110      | 1,56 | 0,39 | 1,22                  | 1,59 | 0,01 |
| 3                     | 12       | 1,54 | 0,34 | 1,84                  | 1,48 | 0,03 | 168      | 1,59 | 0,43 | 1,84                  | 1,58 | 0,01 |
| 4                     | 25       | 1,59 | 0,42 | 2,45                  | 1,50 | 0,02 | 271      | 1,53 | 0,36 | 2,45                  | 1,57 | 0,01 |
| 5                     | 55       | 1,64 | 0,39 | 3,06                  | 1,52 | 0,03 | 414      | 1,59 | 0,41 | 3,06                  | 1,57 | 0,01 |
| 6                     | 65       | 1,45 | 0,39 | 3,67                  | 1,54 | 0,03 | 637      | 1,57 | 0,38 | 3,67                  | 1,56 | 0,01 |
| 7                     | 100      | 1,50 | 0,38 | 4,29                  | 1,55 | 0,03 | 808      | 1,55 | 0,39 | 4,29                  | 1,56 | 0,01 |
| 8                     | 76       | 1,54 | 0,42 | 4,90                  | 1,56 | 0,02 | 1010     | 1,56 | 0,41 | 4,90                  | 1,56 | 0,01 |
| 9                     | 135      | 1,55 | 0,39 | 5,51                  | 1,57 | 0,02 | 1241     | 1,55 | 0,38 | 5,51                  | 1,56 | 0,01 |
| 10                    | 147      | 1,54 | 0,40 | 6,12                  | 1,57 | 0,02 | 1496     | 1,56 | 0,40 | 6,12                  | 1,56 | 0,01 |
| 11                    | 147      | 1,56 | 0,38 | 6,73                  | 1,57 | 0,02 | 1795     | 1,56 | 0,38 | 6,73                  | 1,56 | 0,01 |
| 12                    | 199      | 1,57 | 0,39 | 7,35                  | 1,57 | 0,02 | 1978     | 1,57 | 0,38 | 7,35                  | 1,56 | 0,01 |
| 13                    | 204      | 1,62 | 0,38 | 7,96                  | 1,57 | 0,02 | 2219     | 1,57 | 0,39 | 7,96                  | 1,56 | 0,01 |
| 14                    | 220      | 1,55 | 0,41 | 8,57                  | 1,57 | 0,01 | 2296     | 1,58 | 0,39 | 8,57                  | 1,56 | 0,00 |
| 15                    | 228      | 1,60 | 0,37 | 9,18                  | 1,57 | 0,01 | 2476     | 1,60 | 0,39 | 9,18                  | 1,56 | 0,00 |
| 16                    | 282      | 1,58 | 0,38 | 9,80                  | 1,57 | 0,01 | 2552     | 1,58 | 0,38 | 9,80                  | 1,56 | 0,00 |
| 17                    | 271      | 1,55 | 0,38 | 10,41                 | 1,57 | 0,01 | 2706     | 1,58 | 0,38 | 10,41                 | 1,56 | 0,00 |
| 18                    | 266      | 1,55 | 0,36 | 11,02                 | 1,57 | 0,01 | 2792     | 1,58 | 0,39 | 11,02                 | 1,56 | 0,00 |
| 19                    | 281      | 1,59 | 0,40 | 11,63                 | 1,56 | 0,01 | 2788     | 1,58 | 0,38 | 11,63                 | 1,57 | 0,00 |
| 20                    | 278      | 1,58 | 0,39 | 12,24                 | 1,56 | 0,01 | 2715     | 1,57 | 0,38 | 12,24                 | 1,57 | 0,00 |
| 21                    | 278      | 1,58 | 0,41 | 12,86                 | 1,56 | 0,01 | 2619     | 1,59 | 0,39 | 12,86                 | 1,57 | 0,00 |
| 22                    | 263      | 1,60 | 0,40 | 13,47                 | 1,56 | 0,01 | 2626     | 1,59 | 0,39 | 13,47                 | 1,57 | 0,00 |
| 23                    | 268      | 1,59 | 0,38 | 14,08                 | 1,56 | 0,01 | 2695     | 1,60 | 0,39 | 14,08                 | 1,57 | 0,00 |
| 24                    | 215      | 1,63 | 0,36 | 14,69                 | 1,56 | 0,01 | 2315     | 1,60 | 0,39 | 14,69                 | 1,57 | 0,00 |
| 25                    | 177      | 1,62 | 0,36 | 15,31                 | 1,56 | 0,01 | 1996     | 1,61 | 0,38 | 15,31                 | 1,58 | 0,00 |
| 26                    | 157      | 1,64 | 0,34 | 15,92                 | 1,56 | 0,01 | 1637     | 1,60 | 0,38 | 15,92                 | 1,58 | 0,00 |
| 27                    | 151      | 1,66 | 0,39 | 16,53                 | 1,56 | 0,01 | 1262     | 1,61 | 0,38 | 16,53                 | 1,58 | 0,00 |
| 28                    | 120      | 1,61 | 0,34 | 17,14                 | 1,56 | 0,01 | 1069     | 1,62 | 0,38 | 17,14                 | 1,58 | 0,00 |
| 29                    | 101      | 1,68 | 0,35 | 17,76                 | 1,57 | 0,01 | 871      | 1,63 | 0,38 | 17,76                 | 1,58 | 0,00 |
| 30                    | 59       | 1,65 | 0,39 | 18,37                 | 1,57 | 0,01 | 566      | 1,61 | 0,37 | 18,37                 | 1,58 | 0,00 |
|                       |          |      |      | 18,98                 | 1,57 | 0,01 |          |      |      | 18,98                 | 1,58 | 0,00 |
|                       |          |      |      | 19,59                 | 1,58 | 0,01 |          |      |      | 19,59                 | 1,59 | 0,00 |
|                       |          |      |      | 20,20                 | 1,58 | 0,01 |          |      |      | 20,20                 | 1,59 | 0,00 |
|                       |          |      |      | 20,82                 | 1,59 | 0,01 |          |      |      | 20,82                 | 1,59 | 0,00 |
|                       |          |      |      | 21,43                 | 1,59 | 0,01 |          |      |      | 21,43                 | 1,59 | 0,00 |
|                       |          |      |      | 22,04                 | 1,60 | 0,01 |          |      |      | 22,04                 | 1,59 | 0,00 |
|                       |          |      |      | 22,65                 | 1,60 | 0,01 |          |      |      | 22,65                 | 1,59 | 0,00 |
|                       |          |      |      | 23,27                 | 1,61 | 0,01 |          |      |      | 23,27                 | 1,59 | 0,00 |
|                       |          |      |      | 23,88                 | 1,61 | 0,01 |          |      |      | 23,88                 | 1,60 | 0,00 |
|                       |          |      |      | 24,49                 | 1,62 | 0,01 |          |      |      | 24,49                 | 1,60 | 0,00 |
|                       |          |      |      | 25,10                 | 1,63 | 0,01 |          |      |      | 25,10                 | 1,60 | 0,00 |
|                       |          |      |      | 25,71                 | 1,63 | 0,01 |          |      |      | 25,71                 | 1,60 | 0,00 |
|                       |          |      |      | 26,33                 | 1,64 | 0,01 |          |      |      | 26,33                 | 1,60 | 0,00 |
|                       |          |      |      | 26,94                 | 1,64 | 0,01 |          |      |      | 26,94                 | 1,61 | 0,00 |
|                       |          |      |      | 27,55                 | 1,65 | 0,01 |          |      |      | 27,55                 | 1,61 | 0,00 |
|                       |          |      |      | 28,16                 | 1,65 | 0,01 |          |      |      | 28,16                 | 1,61 | 0,00 |
|                       |          |      |      | 28,78                 | 1,65 | 0,02 |          |      |      | 28,78                 | 1,62 | 0,00 |
|                       |          |      |      | 29,39                 | 1,66 | 0,02 |          |      |      | 29,39                 | 1,62 | 0,00 |
|                       |          |      |      | 30,00                 | 1,66 | 0,03 |          |      |      | 30,00                 | 1,62 | 0,00 |



| Anxiety               |          |      |      |                       |      |      |          |      |      |                       |      |      |
|-----------------------|----------|------|------|-----------------------|------|------|----------|------|------|-----------------------|------|------|
| ApoA-I                |          |      |      |                       |      |      |          |      |      |                       |      |      |
|                       | Cases    |      |      |                       |      |      | Controls |      |      |                       |      |      |
|                       | Observed |      |      | Predicted             |      |      | Observed |      |      | Predicted             |      |      |
| Time since index date | Number   | Mean | SD   | Time since index date | Mean | SE   | Number   | Mean | SD   | Time since index date | Mean | SE   |
| 0                     | 5        | 1,35 | 0,24 | 0,00                  | 1,39 | 0,03 | 60       | 1,49 | 0,24 | 0,00                  | 1,47 | 0,01 |
| 1                     | 4        | 1,39 | 0,14 | 0,61                  | 1,41 | 0,02 | 76       | 1,46 | 0,24 | 0,61                  | 1,46 | 0,01 |
| 2                     | 9        | 1,50 | 0,17 | 1,22                  | 1,42 | 0,02 | 102      | 1,41 | 0,20 | 1,22                  | 1,45 | 0,01 |
| 3                     | 11       | 1,51 | 0,18 | 1,84                  | 1,43 | 0,02 | 151      | 1,43 | 0,23 | 1,84                  | 1,44 | 0,01 |
| 4                     | 23       | 1,44 | 0,26 | 2,45                  | 1,44 | 0,01 | 225      | 1,41 | 0,20 | 2,45                  | 1,44 | 0,01 |
| 5                     | 45       | 1,49 | 0,25 | 3,06                  | 1,45 | 0,01 | 322      | 1,44 | 0,23 | 3,06                  | 1,43 | 0,01 |
| 6                     | 48       | 1,40 | 0,25 | 3,67                  | 1,45 | 0,01 | 495      | 1,44 | 0,21 | 3,67                  | 1,43 | 0,01 |
| 7                     | 74       | 1,42 | 0,23 | 4,29                  | 1,46 | 0,01 | 629      | 1,42 | 0,21 | 4,29                  | 1,43 | 0,01 |
| 8                     | 57       | 1,42 | 0,27 | 4,90                  | 1,46 | 0,01 | 794      | 1,42 | 0,22 | 4,90                  | 1,42 | 0,00 |
| 9                     | 101      | 1,45 | 0,24 | 5,51                  | 1,46 | 0,01 | 950      | 1,42 | 0,21 | 5,51                  | 1,42 | 0,00 |
| 10                    | 102      | 1,44 | 0,23 | 6,12                  | 1,46 | 0,01 | 1184     | 1,42 | 0,22 | 6,12                  | 1,42 | 0,00 |
| 11                    | 116      | 1,43 | 0,21 | 6,73                  | 1,46 | 0,01 | 1428     | 1,41 | 0,21 | 6,73                  | 1,42 | 0,00 |
| 12                    | 158      | 1,45 | 0,22 | 7,35                  | 1,45 | 0,01 | 1605     | 1,42 | 0,21 | 7,35                  | 1,42 | 0,00 |
| 13                    | 169      | 1,47 | 0,22 | 7,96                  | 1,45 | 0,01 | 1824     | 1,42 | 0,23 | 7,96                  | 1,42 | 0,00 |
| 14                    | 187      | 1,42 | 0,23 | 8,57                  | 1,45 | 0,01 | 1892     | 1,42 | 0,22 | 8,57                  | 1,42 | 0,00 |
| 15                    | 192      | 1,44 | 0,23 | 9,18                  | 1,45 | 0,01 | 2074     | 1,43 | 0,23 | 9,18                  | 1,42 | 0,00 |
| 16                    | 243      | 1,44 | 0,22 | 9,80                  | 1,44 | 0,01 | 2150     | 1,42 | 0,22 | 9,80                  | 1,42 | 0,00 |
| 17                    | 239      | 1,42 | 0,21 | 10,41                 | 1,44 | 0,01 | 2297     | 1,42 | 0,22 | 10,41                 | 1,42 | 0,00 |
| 18                    | 229      | 1,41 | 0,21 | 11,02                 | 1,44 | 0,01 | 2389     | 1,42 | 0,22 | 11,02                 | 1,42 | 0,00 |
| 19                    | 255      | 1,43 | 0,23 | 11,63                 | 1,44 | 0,01 | 2410     | 1,43 | 0,22 | 11,63                 | 1,42 | 0,00 |
| 20                    | 254      | 1,44 | 0,22 | 12,24                 | 1,43 | 0,01 | 2325     | 1,42 | 0,22 | 12,24                 | 1,42 | 0,00 |
| 21                    | 249      | 1,46 | 0,23 | 12,86                 | 1,43 | 0,01 | 2267     | 1,43 | 0,23 | 12,86                 | 1,42 | 0,00 |
| 22                    | 238      | 1,44 | 0,25 | 13,47                 | 1,43 | 0,01 | 2287     | 1,43 | 0,22 | 13,47                 | 1,42 | 0,00 |
| 23                    | 250      | 1,42 | 0,22 | 14,08                 | 1,43 | 0,01 | 2389     | 1,43 | 0,23 | 14,08                 | 1,42 | 0,00 |
| 24                    | 193      | 1,44 | 0,21 | 14,69                 | 1,43 | 0,01 | 2090     | 1,43 | 0,22 | 14,69                 | 1,42 | 0,00 |
| 25                    | 167      | 1,44 | 0,22 | 15,31                 | 1,43 | 0,01 | 1863     | 1,43 | 0,21 | 15,31                 | 1,42 | 0,00 |
| 26                    | 160      | 1,45 | 0,22 | 15,92                 | 1,43 | 0,01 | 1597     | 1,42 | 0,22 | 15,92                 | 1,42 | 0,00 |
| 27                    | 157      | 1,46 | 0,23 | 16,53                 | 1,43 | 0,01 | 1292     | 1,42 | 0,22 | 16,53                 | 1,42 | 0,00 |
| 28                    | 124      | 1,43 | 0,21 | 17,14                 | 1,43 | 0,00 | 1110     | 1,43 | 0,23 | 17,14                 | 1,42 | 0,00 |
| 29                    | 103      | 1,47 | 0,21 | 17,76                 | 1,43 | 0,00 | 908      | 1,43 | 0,23 | 17,76                 | 1,42 | 0,00 |
| 30                    | 66       | 1,42 | 0,25 | 18,37                 | 1,43 | 0,00 | 588      | 1,43 | 0,21 | 18,37                 | 1,42 | 0,00 |
|                       |          |      |      | 18,98                 | 1,43 | 0,00 |          |      |      | 18,98                 | 1,42 | 0,00 |
|                       |          |      |      | 19,59                 | 1,43 | 0,00 |          |      |      | 19,59                 | 1,43 | 0,00 |
|                       |          |      |      | 20,20                 | 1,43 | 0,00 |          |      |      | 20,20                 | 1,43 | 0,00 |
|                       |          |      |      | 20,82                 | 1,43 | 0,00 |          |      |      | 20,82                 | 1,43 | 0,00 |
|                       |          |      |      | 21,43                 | 1,44 | 0,00 |          |      |      | 21,43                 | 1,43 | 0,00 |
|                       |          |      |      | 22,04                 | 1,44 | 0,00 |          |      |      | 22,04                 | 1,43 | 0,00 |
|                       |          |      |      | 22,65                 | 1,44 | 0,00 |          |      |      | 22,65                 | 1,43 | 0,00 |
|                       |          |      |      | 23,27                 | 1,44 | 0,01 |          |      |      | 23,27                 | 1,43 | 0,00 |
|                       |          |      |      | 23,88                 | 1,44 | 0,01 |          |      |      | 23,88                 | 1,43 | 0,00 |
|                       |          |      |      | 24,49                 | 1,45 | 0,01 |          |      |      | 24,49                 | 1,43 | 0,00 |
|                       |          |      |      | 25,10                 | 1,45 | 0,01 |          |      |      | 25,10                 | 1,43 | 0,00 |
|                       |          |      |      | 25,71                 | 1,45 | 0,01 |          |      |      | 25,71                 | 1,43 | 0,00 |
|                       |          |      |      | 26,33                 | 1,45 | 0,01 |          |      |      | 26,33                 | 1,43 | 0,00 |
|                       |          |      |      | 26,94                 | 1,45 | 0,01 |          |      |      | 26,94                 | 1,43 | 0,00 |
|                       |          |      |      | 27,55                 | 1,45 | 0,01 |          |      |      | 27,55                 | 1,43 | 0,00 |
|                       |          |      |      | 28,16                 | 1,45 | 0,01 |          |      |      | 28,16                 | 1,43 | 0,00 |
|                       |          |      |      | 28,78                 | 1,44 | 0,01 |          |      |      | 28,78                 | 1,43 | 0,00 |
|                       |          |      |      | 29,39                 | 1,44 | 0,01 |          |      |      | 29,39                 | 1,43 | 0,00 |
|                       |          |      |      | 30,00                 | 1,44 | 0,02 |          |      |      | 30,00                 | 1,43 | 0,00 |

| Anxiety               |          |      |      |                       |      |      |          |      |      |                       |      |      |
|-----------------------|----------|------|------|-----------------------|------|------|----------|------|------|-----------------------|------|------|
| ApoB                  |          |      |      |                       |      |      |          |      |      |                       |      |      |
|                       | Cases    |      |      |                       |      |      | Controls |      |      |                       |      |      |
|                       | Observed |      |      | Predicted             |      |      | Observed |      |      | Predicted             |      |      |
| Time since index date | Number   | Mean | SD   | Time since index date | Mean | SE   | Number   | Mean | SD   | Time since index date | Mean | SE   |
| 0                     | 5        | 1,31 | 0,46 | 0,00                  | 1,34 | 0,05 | 64       | 1,06 | 0,26 | 0,00                  | 1,11 | 0,01 |
| 1                     | 4        | 1,38 | 0,53 | 0,61                  | 1,32 | 0,04 | 69       | 1,15 | 0,34 | 0,61                  | 1,12 | 0,01 |
| 2                     | 10       | 1,24 | 0,36 | 1,22                  | 1,31 | 0,03 | 98       | 1,19 | 0,40 | 1,22                  | 1,13 | 0,01 |
| 3                     | 11       | 1,30 | 0,36 | 1,84                  | 1,29 | 0,03 | 142      | 1,17 | 0,32 | 1,84                  | 1,14 | 0,00 |
| 4                     | 22       | 1,25 | 0,35 | 2,45                  | 1,28 | 0,02 | 214      | 1,17 | 0,33 | 2,45                  | 1,15 | 0,00 |
| 5                     | 42       | 1,20 | 0,33 | 3,06                  | 1,26 | 0,02 | 328      | 1,14 | 0,33 | 3,06                  | 1,15 | 0,00 |
| 6                     | 47       | 1,15 | 0,37 | 3,67                  | 1,25 | 0,02 | 482      | 1,14 | 0,35 | 3,67                  | 1,16 | 0,00 |
| 7                     | 71       | 1,26 | 0,41 | 4,29                  | 1,24 | 0,02 | 605      | 1,14 | 0,36 | 4,29                  | 1,16 | 0,00 |
| 8                     | 51       | 1,22 | 0,43 | 4,90                  | 1,23 | 0,02 | 806      | 1,15 | 0,36 | 4,90                  | 1,16 | 0,00 |
| 9                     | 92       | 1,15 | 0,36 | 5,51                  | 1,22 | 0,02 | 964      | 1,14 | 0,35 | 5,51                  | 1,16 | 0,00 |
| 10                    | 96       | 1,15 | 0,37 | 6,12                  | 1,21 | 0,02 | 1158     | 1,15 | 0,36 | 6,12                  | 1,16 | 0,00 |
| 11                    | 115      | 1,19 | 0,35 | 6,73                  | 1,20 | 0,02 | 1369     | 1,14 | 0,35 | 6,73                  | 1,16 | 0,00 |
| 12                    | 135      | 1,17 | 0,36 | 7,35                  | 1,19 | 0,02 | 1551     | 1,15 | 0,36 | 7,35                  | 1,16 | 0,00 |
| 13                    | 161      | 1,13 | 0,35 | 7,96                  | 1,19 | 0,02 | 1769     | 1,15 | 0,37 | 7,96                  | 1,16 | 0,00 |
| 14                    | 176      | 1,14 | 0,35 | 8,57                  | 1,18 | 0,01 | 1800     | 1,16 | 0,35 | 8,57                  | 1,15 | 0,00 |
| 15                    | 179      | 1,20 | 0,37 | 9,18                  | 1,18 | 0,01 | 1915     | 1,14 | 0,35 | 9,18                  | 1,15 | 0,00 |
| 16                    | 229      | 1,19 | 0,35 | 9,80                  | 1,17 | 0,01 | 2043     | 1,16 | 0,36 | 9,80                  | 1,15 | 0,00 |
| 17                    | 236      | 1,19 | 0,37 | 10,41                 | 1,17 | 0,01 | 2108     | 1,16 | 0,37 | 10,41                 | 1,15 | 0,00 |
| 18                    | 211      | 1,19 | 0,40 | 11,02                 | 1,17 | 0,01 | 2221     | 1,17 | 0,35 | 11,02                 | 1,15 | 0,00 |
| 19                    | 235      | 1,19 | 0,36 | 11,63                 | 1,17 | 0,01 | 2146     | 1,17 | 0,35 | 11,63                 | 1,15 | 0,00 |
| 20                    | 222      | 1,16 | 0,35 | 12,24                 | 1,17 | 0,01 | 2162     | 1,16 | 0,36 | 12,24                 | 1,15 | 0,00 |
| 21                    | 229      | 1,21 | 0,35 | 12,86                 | 1,17 | 0,01 | 2080     | 1,19 | 0,36 | 12,86                 | 1,15 | 0,00 |
| 22                    | 214      | 1,19 | 0,37 | 13,47                 | 1,17 | 0,01 | 2123     | 1,18 | 0,36 | 13,47                 | 1,15 | 0,00 |
| 23                    | 212      | 1,21 | 0,35 | 14,08                 | 1,17 | 0,01 | 2112     | 1,19 | 0,36 | 14,08                 | 1,15 | 0,00 |
| 24                    | 171      | 1,22 | 0,35 | 14,69                 | 1,17 | 0,01 | 1823     | 1,19 | 0,37 | 14,69                 | 1,15 | 0,00 |
| 25                    | 150      | 1,22 | 0,33 | 15,31                 | 1,17 | 0,01 | 1651     | 1,21 | 0,35 | 15,31                 | 1,15 | 0,00 |
| 26                    | 131      | 1,18 | 0,30 | 15,92                 | 1,17 | 0,01 | 1334     | 1,24 | 0,37 | 15,92                 | 1,15 | 0,00 |
| 27                    | 126      | 1,25 | 0,35 | 16,53                 | 1,17 | 0,01 | 1063     | 1,23 | 0,34 | 16,53                 | 1,15 | 0,00 |
| 28                    | 97       | 1,23 | 0,33 | 17,14                 | 1,18 | 0,01 | 876      | 1,24 | 0,34 | 17,14                 | 1,16 | 0,00 |
| 29                    | 74       | 1,23 | 0,30 | 17,76                 | 1,18 | 0,01 | 651      | 1,24 | 0,33 | 17,76                 | 1,16 | 0,00 |
| 30                    | 51       | 1,22 | 0,30 | 18,37                 | 1,18 | 0,01 | 475      | 1,26 | 0,30 | 18,37                 | 1,16 | 0,00 |
|                       |          |      |      | 18,98                 | 1,19 | 0,01 |          |      |      | 18,98                 | 1,17 | 0,00 |
|                       |          |      |      | 19,59                 | 1,19 | 0,01 |          |      |      | 19,59                 | 1,17 | 0,00 |
|                       |          |      |      | 20,20                 | 1,19 | 0,01 |          |      |      | 20,20                 | 1,17 | 0,00 |
|                       |          |      |      | 20,82                 | 1,19 | 0,01 |          |      |      | 20,82                 | 1,18 | 0,00 |
|                       |          |      |      | 21,43                 | 1,20 | 0,01 |          |      |      | 21,43                 | 1,18 | 0,00 |
|                       |          |      |      | 22,04                 | 1,20 | 0,01 |          |      |      | 22,04                 | 1,19 | 0,00 |
|                       |          |      |      | 22,65                 | 1,20 | 0,01 |          |      |      | 22,65                 | 1,19 | 0,00 |
|                       |          |      |      | 23,27                 | 1,21 | 0,01 |          |      |      | 23,27                 | 1,20 | 0,00 |
|                       |          |      |      | 23,88                 | 1,21 | 0,01 |          |      |      | 23,88                 | 1,20 | 0,00 |
|                       |          |      |      | 24,49                 | 1,21 | 0,01 |          |      |      | 24,49                 | 1,21 | 0,00 |
|                       |          |      |      | 25,10                 | 1,22 | 0,01 |          |      |      | 25,10                 | 1,22 | 0,00 |
|                       |          |      |      | 25,71                 | 1,22 | 0,01 |          |      |      | 25,71                 | 1,22 | 0,00 |
|                       |          |      |      | 26,33                 | 1,22 | 0,01 |          |      |      | 26,33                 | 1,23 | 0,00 |
|                       |          |      |      | 26,94                 | 1,22 | 0,01 |          |      |      | 26,94                 | 1,23 | 0,00 |
|                       |          |      |      | 27,55                 | 1,22 | 0,01 |          |      |      | 27,55                 | 1,24 | 0,00 |
|                       |          |      |      | 28,16                 | 1,22 | 0,01 |          |      |      | 28,16                 | 1,24 | 0,00 |
|                       |          |      |      | 28,78                 | 1,23 | 0,01 |          |      |      | 28,78                 | 1,25 | 0,00 |
|                       |          |      |      | 29,39                 | 1,23 | 0,02 |          |      |      | 29,39                 | 1,25 | 0,01 |
|                       |          |      |      | 30,00                 | 1,23 | 0,02 |          |      |      | 30,00                 | 1,26 | 0,01 |

| Anxiety                |          |      |      |                       |      |      |          |      |      |                       |      |      |
|------------------------|----------|------|------|-----------------------|------|------|----------|------|------|-----------------------|------|------|
| Log2 LDL-C/HDL-C ratio |          |      |      |                       |      |      |          |      |      |                       |      |      |
|                        | Cases    |      |      |                       |      |      | Controls |      |      |                       |      |      |
|                        | Observed |      |      | Predicted             |      |      | Observed |      |      | Predicted             |      |      |
| Time since index date  | Number   | Mean | SD   | Time since index date | Mean | SE   | Number   | Mean | SD   | Time since index date | Mean | SE   |
| 0                      | 6        | 1,69 | 0,38 | 0,00                  | 1,54 | 0,10 | 60       | 1,10 | 0,55 | 0,00                  | 1,14 | 0,04 |
| 1                      | 5        | 1,31 | 0,39 | 0,61                  | 1,48 | 0,08 | 80       | 1,23 | 0,57 | 0,61                  | 1,15 | 0,03 |
| 2                      | 8        | 1,18 | 0,44 | 1,22                  | 1,42 | 0,06 | 102      | 1,16 | 0,62 | 1,22                  | 1,16 | 0,02 |
| 3                      | 11       | 1,45 | 0,64 | 1,84                  | 1,37 | 0,06 | 151      | 1,15 | 0,62 | 1,84                  | 1,17 | 0,02 |
| 4                      | 22       | 1,21 | 0,57 | 2,45                  | 1,33 | 0,05 | 249      | 1,24 | 0,57 | 2,45                  | 1,18 | 0,02 |
| 5                      | 54       | 1,15 | 0,59 | 3,06                  | 1,29 | 0,05 | 374      | 1,18 | 0,59 | 3,06                  | 1,19 | 0,02 |
| 6                      | 59       | 1,21 | 0,61 | 3,67                  | 1,26 | 0,05 | 587      | 1,17 | 0,61 | 3,67                  | 1,19 | 0,02 |
| 7                      | 90       | 1,35 | 0,63 | 4,29                  | 1,24 | 0,05 | 730      | 1,20 | 0,59 | 4,29                  | 1,19 | 0,02 |
| 8                      | 70       | 1,16 | 0,64 | 4,90                  | 1,22 | 0,05 | 919      | 1,17 | 0,61 | 4,90                  | 1,19 | 0,01 |
| 9                      | 128      | 1,15 | 0,65 | 5,51                  | 1,21 | 0,04 | 1137     | 1,18 | 0,58 | 5,51                  | 1,19 | 0,01 |
| 10                     | 139      | 1,19 | 0,62 | 6,12                  | 1,19 | 0,04 | 1378     | 1,17 | 0,61 | 6,12                  | 1,19 | 0,01 |
| 11                     | 130      | 1,21 | 0,63 | 6,73                  | 1,19 | 0,04 | 1645     | 1,15 | 0,59 | 6,73                  | 1,19 | 0,01 |
| 12                     | 184      | 1,16 | 0,59 | 7,35                  | 1,18 | 0,03 | 1782     | 1,16 | 0,60 | 7,35                  | 1,18 | 0,01 |
| 13                     | 187      | 1,12 | 0,60 | 7,96                  | 1,18 | 0,03 | 2043     | 1,14 | 0,63 | 7,96                  | 1,18 | 0,01 |
| 14                     | 205      | 1,15 | 0,61 | 8,57                  | 1,17 | 0,03 | 2134     | 1,14 | 0,60 | 8,57                  | 1,17 | 0,01 |
| 15                     | 211      | 1,23 | 0,57 | 9,18                  | 1,17 | 0,02 | 2294     | 1,09 | 0,60 | 9,18                  | 1,17 | 0,01 |
| 16                     | 265      | 1,15 | 0,58 | 9,80                  | 1,17 | 0,02 | 2385     | 1,13 | 0,60 | 9,80                  | 1,16 | 0,01 |
| 17                     | 243      | 1,17 | 0,61 | 10,41                 | 1,17 | 0,02 | 2517     | 1,12 | 0,60 | 10,41                 | 1,16 | 0,00 |
| 18                     | 249      | 1,16 | 0,62 | 11,02                 | 1,17 | 0,02 | 2627     | 1,11 | 0,60 | 11,02                 | 1,15 | 0,00 |
| 19                     | 257      | 1,13 | 0,60 | 11,63                 | 1,17 | 0,02 | 2617     | 1,11 | 0,61 | 11,63                 | 1,15 | 0,00 |
| 20                     | 259      | 1,12 | 0,62 | 12,24                 | 1,17 | 0,02 | 2535     | 1,12 | 0,61 | 12,24                 | 1,14 | 0,00 |
| 21                     | 259      | 1,18 | 0,64 | 12,86                 | 1,17 | 0,02 | 2440     | 1,14 | 0,61 | 12,86                 | 1,14 | 0,00 |
| 22                     | 247      | 1,14 | 0,65 | 13,47                 | 1,18 | 0,01 | 2462     | 1,12 | 0,62 | 13,47                 | 1,13 | 0,00 |
| 23                     | 259      | 1,10 | 0,60 | 14,08                 | 1,18 | 0,01 | 2552     | 1,13 | 0,62 | 14,08                 | 1,13 | 0,00 |
| 24                     | 209      | 1,11 | 0,58 | 14,69                 | 1,18 | 0,01 | 2231     | 1,11 | 0,62 | 14,69                 | 1,13 | 0,00 |
| 25                     | 173      | 1,09 | 0,54 | 15,31                 | 1,18 | 0,01 | 1932     | 1,10 | 0,61 | 15,31                 | 1,12 | 0,00 |
| 26                     | 152      | 0,97 | 0,59 | 15,92                 | 1,17 | 0,01 | 1596     | 1,13 | 0,63 | 15,92                 | 1,12 | 0,00 |
| 27                     | 149      | 1,09 | 0,58 | 16,53                 | 1,17 | 0,01 | 1253     | 1,11 | 0,61 | 16,53                 | 1,12 | 0,00 |
| 28                     | 120      | 1,10 | 0,52 | 17,14                 | 1,17 | 0,01 | 1068     | 1,09 | 0,62 | 17,14                 | 1,12 | 0,00 |
| 29                     | 101      | 1,00 | 0,57 | 17,76                 | 1,17 | 0,01 | 871      | 1,06 | 0,60 | 17,76                 | 1,12 | 0,00 |
| 30                     | 59       | 1,02 | 0,67 | 18,37                 | 1,16 | 0,01 | 566      | 1,08 | 0,59 | 18,37                 | 1,12 | 0,00 |
|                        |          |      | 0,38 | 18,98                 | 1,16 | 0,01 |          |      |      | 18,98                 | 1,12 | 0,00 |
|                        |          |      | 0,39 | 19,59                 | 1,15 | 0,01 |          |      |      | 19,59                 | 1,12 | 0,00 |
|                        |          |      | 0,44 | 20,20                 | 1,14 | 0,01 |          |      |      | 20,20                 | 1,12 | 0,00 |
|                        |          |      | 0,64 | 20,82                 | 1,14 | 0,01 |          |      |      | 20,82                 | 1,12 | 0,00 |
|                        |          |      | 0,57 | 21,43                 | 1,13 | 0,01 |          |      |      | 21,43                 | 1,12 | 0,00 |
|                        |          |      | 0,59 | 22,04                 | 1,12 | 0,01 |          |      |      | 22,04                 | 1,12 | 0,00 |
|                        |          |      | 0,61 | 22,65                 | 1,11 | 0,01 |          |      |      | 22,65                 | 1,12 | 0,00 |
|                        |          |      | 0,63 | 23,27                 | 1,11 | 0,02 |          |      |      | 23,27                 | 1,12 | 0,01 |
|                        |          |      | 0,64 | 23,88                 | 1,10 | 0,02 |          |      |      | 23,88                 | 1,12 | 0,01 |
|                        |          |      | 0,65 | 24,49                 | 1,09 | 0,02 |          |      |      | 24,49                 | 1,12 | 0,01 |
|                        |          |      | 0,62 | 25,10                 | 1,08 | 0,02 |          |      |      | 25,10                 | 1,12 | 0,01 |
|                        |          |      | 0,63 | 25,71                 | 1,07 | 0,02 |          |      |      | 25,71                 | 1,12 | 0,01 |
|                        |          |      | 0,59 | 26,33                 | 1,06 | 0,02 |          |      |      | 26,33                 | 1,11 | 0,01 |
|                        |          |      | 0,60 | 26,94                 | 1,05 | 0,02 |          |      |      | 26,94                 | 1,11 | 0,01 |
|                        |          |      | 0,61 | 27,55                 | 1,05 | 0,02 |          |      |      | 27,55                 | 1,10 | 0,01 |
|                        |          |      | 0,57 | 28,16                 | 1,04 | 0,03 |          |      |      | 28,16                 | 1,09 | 0,01 |
|                        |          |      | 0,58 | 28,78                 | 1,03 | 0,03 |          |      |      | 28,78                 | 1,09 | 0,01 |
|                        |          |      | 0,61 | 29,39                 | 1,03 | 0,04 |          |      |      | 29,39                 | 1,07 | 0,01 |
|                        |          |      | 0,62 | 30,00                 | 1,03 | 0,05 |          |      |      | 30,00                 | 1,06 | 0,01 |

| Anxiety                |          |       |      |                       |       |      |          |       |      |                       |       |      |
|------------------------|----------|-------|------|-----------------------|-------|------|----------|-------|------|-----------------------|-------|------|
| Log2 ApoB/ApoA-I ratio |          |       |      |                       |       |      |          |       |      |                       |       |      |
|                        | Cases    |       |      |                       |       |      | Controls |       |      |                       |       |      |
|                        | Observed |       |      | Predicted             |       |      | Observed |       |      | Predicted             |       |      |
| Time since index date  | Number   | Mean  | SD   | Time since index date | Mean  | SE   | Number   | Mean  | SD   | Time since index date | Mean  | SE   |
| 0                      | 11       | -0,29 | 0,24 | 0,00                  | -0,40 | 0,09 | 207      | -0,62 | 0,41 | 0,00                  | -0,60 | 0,02 |
| 1                      | 6        | -0,39 | 0,00 | 0,61                  | -0,42 | 0,07 | 210      | -0,53 | 0,42 | 0,61                  | -0,56 | 0,02 |
| 2                      | 28       | -0,64 | 0,25 | 1,22                  | -0,44 | 0,06 | 300      | -0,50 | 0,41 | 1,22                  | -0,53 | 0,01 |
| 3                      | 42       | -0,56 | 0,41 | 1,84                  | -0,45 | 0,05 | 380      | -0,40 | 0,40 | 1,84                  | -0,51 | 0,01 |
| 4                      | 36       | -0,38 | 0,53 | 2,45                  | -0,45 | 0,04 | 447      | -0,42 | 0,38 | 2,45                  | -0,48 | 0,01 |
| 5                      | 98       | -0,56 | 0,31 | 3,06                  | -0,45 | 0,04 | 641      | -0,45 | 0,44 | 3,06                  | -0,46 | 0,01 |
| 6                      | 121      | -0,41 | 0,50 | 3,67                  | -0,45 | 0,04 | 899      | -0,44 | 0,44 | 3,67                  | -0,45 | 0,01 |
| 7                      | 147      | -0,28 | 0,42 | 4,29                  | -0,45 | 0,04 | 1312     | -0,40 | 0,46 | 4,29                  | -0,43 | 0,01 |
| 8                      | 120      | -0,34 | 0,41 | 4,90                  | -0,44 | 0,04 | 1585     | -0,39 | 0,48 | 4,90                  | -0,42 | 0,01 |
| 9                      | 184      | -0,29 | 0,62 | 5,51                  | -0,43 | 0,04 | 1980     | -0,41 | 0,46 | 5,51                  | -0,41 | 0,01 |
| 10                     | 160      | -0,43 | 0,42 | 6,12                  | -0,43 | 0,03 | 2454     | -0,37 | 0,47 | 6,12                  | -0,41 | 0,01 |
| 11                     | 194      | -0,30 | 0,43 | 6,73                  | -0,42 | 0,03 | 2902     | -0,38 | 0,48 | 6,73                  | -0,40 | 0,01 |
| 12                     | 232      | -0,36 | 0,45 | 7,35                  | -0,41 | 0,03 | 3328     | -0,37 | 0,52 | 7,35                  | -0,39 | 0,01 |
| 13                     | 277      | -0,42 | 0,50 | 7,96                  | -0,40 | 0,03 | 3829     | -0,39 | 0,51 | 7,96                  | -0,39 | 0,01 |
| 14                     | 326      | -0,35 | 0,45 | 8,57                  | -0,39 | 0,02 | 3714     | -0,37 | 0,49 | 8,57                  | -0,39 | 0,01 |
| 15                     | 296      | -0,32 | 0,52 | 9,18                  | -0,39 | 0,02 | 3998     | -0,39 | 0,48 | 9,18                  | -0,39 | 0,01 |
| 16                     | 411      | -0,34 | 0,48 | 9,80                  | -0,38 | 0,02 | 4262     | -0,39 | 0,46 | 9,80                  | -0,38 | 0,01 |
| 17                     | 354      | -0,36 | 0,48 | 10,41                 | -0,37 | 0,02 | 4482     | -0,36 | 0,49 | 10,41                 | -0,38 | 0,01 |
| 18                     | 437      | -0,26 | 0,46 | 11,02                 | -0,36 | 0,02 | 4554     | -0,35 | 0,47 | 11,02                 | -0,38 | 0,01 |
| 19                     | 489      | -0,30 | 0,50 | 11,63                 | -0,36 | 0,02 | 4434     | -0,34 | 0,50 | 11,63                 | -0,38 | 0,01 |
| 20                     | 383      | -0,41 | 0,47 | 12,24                 | -0,35 | 0,02 | 4165     | -0,36 | 0,51 | 12,24                 | -0,38 | 0,00 |
| 21                     | 414      | -0,37 | 0,45 | 12,86                 | -0,35 | 0,02 | 4167     | -0,35 | 0,48 | 12,86                 | -0,38 | 0,00 |
| 22                     | 331      | -0,32 | 0,46 | 13,47                 | -0,35 | 0,02 | 4355     | -0,37 | 0,49 | 13,47                 | -0,38 | 0,00 |
| 23                     | 425      | -0,23 | 0,48 | 14,08                 | -0,34 | 0,02 | 4491     | -0,31 | 0,50 | 14,08                 | -0,38 | 0,00 |
| 24                     | 332      | -0,27 | 0,43 | 14,69                 | -0,34 | 0,02 | 3723     | -0,32 | 0,51 | 14,69                 | -0,38 | 0,00 |
| 25                     | 302      | -0,25 | 0,44 | 15,31                 | -0,33 | 0,02 | 3174     | -0,29 | 0,46 | 15,31                 | -0,38 | 0,01 |
| 26                     | 261      | -0,28 | 0,43 | 15,92                 | -0,33 | 0,02 | 2532     | -0,26 | 0,47 | 15,92                 | -0,38 | 0,01 |
| 27                     | 207      | -0,12 | 0,41 | 16,53                 | -0,33 | 0,02 | 2043     | -0,27 | 0,47 | 16,53                 | -0,38 | 0,01 |
| 28                     | 154      | -0,21 | 0,34 | 17,14                 | -0,33 | 0,02 | 1644     | -0,23 | 0,47 | 17,14                 | -0,37 | 0,01 |
| 29                     | 125      | -0,27 | 0,32 | 17,76                 | -0,32 | 0,02 | 1098     | -0,22 | 0,43 | 17,76                 | -0,37 | 0,01 |
| 30                     | 74       | -0,25 | 0,38 | 18,37                 | -0,32 | 0,02 | 735      | -0,20 | 0,41 | 18,37                 | -0,37 | 0,01 |
|                        |          |       |      | 18,98                 | -0,32 | 0,02 |          |       |      | 18,98                 | -0,36 | 0,01 |
|                        |          |       |      | 19,59                 | -0,31 | 0,02 |          |       |      | 19,59                 | -0,36 | 0,01 |
|                        |          |       |      | 20,20                 | -0,31 | 0,02 |          |       |      | 20,20                 | -0,35 | 0,01 |
|                        |          |       |      | 20,82                 | -0,30 | 0,02 |          |       |      | 20,82                 | -0,35 | 0,01 |
|                        |          |       |      | 21,43                 | -0,30 | 0,02 |          |       |      | 21,43                 | -0,34 | 0,01 |
|                        |          |       |      | 22,04                 | -0,29 | 0,02 |          |       |      | 22,04                 | -0,33 | 0,01 |
|                        |          |       |      | 22,65                 | -0,29 | 0,02 |          |       |      | 22,65                 | -0,33 | 0,01 |
|                        |          |       |      | 23,27                 | -0,28 | 0,02 |          |       |      | 23,27                 | -0,32 | 0,01 |
|                        |          |       |      | 23,88                 | -0,27 | 0,02 |          |       |      | 23,88                 | -0,31 | 0,01 |
|                        |          |       |      | 24,49                 | -0,27 | 0,02 |          |       |      | 24,49                 | -0,30 | 0,01 |
|                        |          |       |      | 25,10                 | -0,26 | 0,02 |          |       |      | 25,10                 | -0,29 | 0,01 |
|                        |          |       |      | 25,71                 | -0,25 | 0,02 |          |       |      | 25,71                 | -0,28 | 0,01 |
|                        |          |       |      | 26,33                 | -0,25 | 0,02 |          |       |      | 26,33                 | -0,27 | 0,01 |
|                        |          |       |      | 26,94                 | -0,24 | 0,02 |          |       |      | 26,94                 | -0,26 | 0,01 |
|                        |          |       |      | 27,55                 | -0,24 | 0,03 |          |       |      | 27,55                 | -0,25 | 0,01 |
|                        |          |       |      | 28,16                 | -0,23 | 0,03 |          |       |      | 28,16                 | -0,23 | 0,01 |
|                        |          |       |      | 28,78                 | -0,23 | 0,03 |          |       |      | 28,78                 | -0,22 | 0,01 |
|                        |          |       |      | 29,39                 | -0,23 | 0,04 |          |       |      | 29,39                 | -0,21 | 0,01 |
|                        |          |       |      | 30,00                 | -0,23 | 0,05 |          |       |      | 30,00                 | -0,20 | 0,01 |

| Stress-related disorders |          |      |      |                       |      |      |          |      |      |                       |      |      |
|--------------------------|----------|------|------|-----------------------|------|------|----------|------|------|-----------------------|------|------|
| Glucose                  |          |      |      |                       |      |      |          |      |      |                       |      |      |
|                          | Cases    |      |      |                       |      |      | Controls |      |      |                       |      |      |
|                          | Observed |      |      | Predicted             |      |      | Observed |      |      | Predicted             |      |      |
| Time since index date    | Number   | Mean | SD   | Time since index date | Mean | SE   | Number   | Mean | SD   | Time since index date | Mean | SE   |
| 0                        | 18       | 5,42 | 1,21 | 0,00                  | 5,15 | 0,30 | 170      | 5,02 | 0,90 | 0,00                  | 5,03 | 0,04 |
| 1                        | 15       | 4,84 | 0,57 | 0,61                  | 5,19 | 0,24 | 268      | 4,93 | 0,70 | 0,61                  | 5,03 | 0,03 |
| 2                        | 35       | 4,96 | 0,83 | 1,22                  | 5,21 | 0,20 | 309      | 5,12 | 1,44 | 1,22                  | 5,03 | 0,03 |
| 3                        | 34       | 5,09 | 1,03 | 1,84                  | 5,23 | 0,17 | 418      | 5,08 | 1,44 | 1,84                  | 5,03 | 0,02 |
| 4                        | 50       | 6,12 | 3,66 | 2,45                  | 5,24 | 0,16 | 636      | 5,09 | 1,47 | 2,45                  | 5,03 | 0,02 |
| 5                        | 123      | 5,16 | 1,57 | 3,06                  | 5,24 | 0,15 | 957      | 5,01 | 1,23 | 3,06                  | 5,03 | 0,02 |
| 6                        | 138      | 5,08 | 1,19 | 3,67                  | 5,23 | 0,15 | 1429     | 4,89 | 0,91 | 3,67                  | 5,02 | 0,02 |
| 7                        | 186      | 5,08 | 1,87 | 4,29                  | 5,22 | 0,15 | 1798     | 4,90 | 0,92 | 4,29                  | 5,01 | 0,02 |
| 8                        | 173      | 4,87 | 0,79 | 4,90                  | 5,20 | 0,14 | 1982     | 4,90 | 1,00 | 4,90                  | 5,00 | 0,02 |
| 9                        | 195      | 4,97 | 1,03 | 5,51                  | 5,18 | 0,13 | 2134     | 4,93 | 1,13 | 5,51                  | 4,99 | 0,02 |
| 10                       | 213      | 4,84 | 0,71 | 6,12                  | 5,16 | 0,12 | 2344     | 4,91 | 1,03 | 6,12                  | 4,98 | 0,02 |
| 11                       | 247      | 4,95 | 1,05 | 6,73                  | 5,13 | 0,11 | 2733     | 4,91 | 1,09 | 6,73                  | 4,96 | 0,02 |
| 12                       | 345      | 4,94 | 1,29 | 7,35                  | 5,11 | 0,09 | 2985     | 4,84 | 0,89 | 7,35                  | 4,95 | 0,02 |
| 13                       | 310      | 4,96 | 1,53 | 7,96                  | 5,08 | 0,08 | 3330     | 4,86 | 1,11 | 7,96                  | 4,94 | 0,01 |
| 14                       | 358      | 4,89 | 1,00 | 8,57                  | 5,05 | 0,06 | 3574     | 4,83 | 0,98 | 8,57                  | 4,93 | 0,01 |
| 15                       | 379      | 4,87 | 1,01 | 9,18                  | 5,02 | 0,05 | 3683     | 4,80 | 0,94 | 9,18                  | 4,92 | 0,01 |
| 16                       | 407      | 4,78 | 0,80 | 9,80                  | 5,00 | 0,04 | 4037     | 4,82 | 1,07 | 9,80                  | 4,90 | 0,01 |
| 17                       | 418      | 4,73 | 0,68 | 10,41                 | 4,97 | 0,03 | 4082     | 4,79 | 0,87 | 10,41                 | 4,89 | 0,01 |
| 18                       | 436      | 4,80 | 0,72 | 11,02                 | 4,95 | 0,03 | 4254     | 4,78 | 0,94 | 11,02                 | 4,88 | 0,01 |
| 19                       | 434      | 4,82 | 0,86 | 11,63                 | 4,92 | 0,02 | 4656     | 4,79 | 0,89 | 11,63                 | 4,87 | 0,01 |
| 20                       | 471      | 4,77 | 0,74 | 12,24                 | 4,90 | 0,02 | 4647     | 4,77 | 0,88 | 12,24                 | 4,86 | 0,01 |
| 21                       | 492      | 4,76 | 0,77 | 12,86                 | 4,88 | 0,02 | 4513     | 4,76 | 0,88 | 12,86                 | 4,85 | 0,01 |
| 22                       | 489      | 4,80 | 0,89 | 13,47                 | 4,86 | 0,02 | 4426     | 4,77 | 0,94 | 13,47                 | 4,84 | 0,01 |
| 23                       | 462      | 4,75 | 0,90 | 14,08                 | 4,85 | 0,02 | 4475     | 4,72 | 0,88 | 14,08                 | 4,83 | 0,01 |
| 24                       | 407      | 4,74 | 1,03 | 14,69                 | 4,83 | 0,01 | 4147     | 4,70 | 0,89 | 14,69                 | 4,83 | 0,01 |
| 25                       | 374      | 4,70 | 0,97 | 15,31                 | 4,82 | 0,01 | 3646     | 4,67 | 0,74 | 15,31                 | 4,82 | 0,01 |
| 26                       | 347      | 4,63 | 0,56 | 15,92                 | 4,81 | 0,01 | 2987     | 4,66 | 0,90 | 15,92                 | 4,81 | 0,00 |
| 27                       | 257      | 4,58 | 0,74 | 16,53                 | 4,80 | 0,01 | 2543     | 4,60 | 0,76 | 16,53                 | 4,80 | 0,00 |
| 28                       | 231      | 4,55 | 0,65 | 17,14                 | 4,79 | 0,01 | 2144     | 4,56 | 0,64 | 17,14                 | 4,80 | 0,00 |
| 29                       | 170      | 4,53 | 0,52 | 17,76                 | 4,78 | 0,01 | 1795     | 4,56 | 0,74 | 17,76                 | 4,79 | 0,00 |
| 30                       | 150      | 4,48 | 0,55 | 18,37                 | 4,78 | 0,01 | 1357     | 4,60 | 0,76 | 18,37                 | 4,78 | 0,00 |
|                          | 18       | 5,42 |      | 18,98                 | 4,77 | 0,01 |          |      |      | 18,98                 | 4,77 | 0,00 |
|                          | 15       | 4,84 |      | 19,59                 | 4,77 | 0,01 |          |      |      | 19,59                 | 4,77 | 0,00 |
|                          | 35       | 4,96 |      | 20,20                 | 4,76 | 0,01 |          |      |      | 20,20                 | 4,76 | 0,00 |
|                          | 34       | 5,09 |      | 20,82                 | 4,76 | 0,01 |          |      |      | 20,82                 | 4,75 | 0,00 |
|                          | 50       | 6,12 |      | 21,43                 | 4,75 | 0,01 |          |      |      | 21,43                 | 4,74 | 0,00 |
|                          | 123      | 5,16 |      | 22,04                 | 4,75 | 0,01 |          |      |      | 22,04                 | 4,73 | 0,00 |
|                          | 138      | 5,08 |      | 22,65                 | 4,74 | 0,01 |          |      |      | 22,65                 | 4,72 | 0,00 |
|                          | 186      | 5,08 |      | 23,27                 | 4,73 | 0,01 |          |      |      | 23,27                 | 4,71 | 0,00 |
|                          | 173      | 4,87 |      | 23,88                 | 4,72 | 0,01 |          |      |      | 23,88                 | 4,70 | 0,01 |
|                          | 195      | 4,97 |      | 24,49                 | 4,71 | 0,01 |          |      |      | 24,49                 | 4,69 | 0,01 |
|                          | 213      | 4,84 |      | 25,10                 | 4,70 | 0,01 |          |      |      | 25,10                 | 4,67 | 0,01 |
|                          | 247      | 4,95 |      | 25,71                 | 4,68 | 0,01 |          |      |      | 25,71                 | 4,66 | 0,01 |
|                          | 345      | 4,94 |      | 26,33                 | 4,66 | 0,01 |          |      |      | 26,33                 | 4,65 | 0,01 |
|                          | 310      | 4,96 |      | 26,94                 | 4,64 | 0,00 |          |      |      | 26,94                 | 4,63 | 0,00 |
|                          | 358      | 4,89 |      | 27,55                 | 4,61 | 0,00 |          |      |      | 27,55                 | 4,62 | 0,01 |
|                          | 379      | 4,87 |      | 28,16                 | 4,57 | 0,00 |          |      |      | 28,16                 | 4,60 | 0,01 |
|                          | 407      | 4,78 |      | 28,78                 | 4,54 | 0,00 |          |      |      | 28,78                 | 4,58 | 0,01 |
|                          | 418      | 4,73 |      | 29,39                 | 4,49 | 0,01 |          |      |      | 29,39                 | 4,56 | 0,01 |
|                          | 436      | 4,80 |      | 30,00                 | 4,44 | 0,01 |          |      |      | 30,00                 | 4,55 | 0,01 |

| Stress-related disorders |          |      |      |                       |      |      |          |      |      |                       |      |      |
|--------------------------|----------|------|------|-----------------------|------|------|----------|------|------|-----------------------|------|------|
| Total Cholesterol        |          |      |      |                       |      |      |          |      |      |                       |      |      |
|                          | Cases    |      |      |                       |      |      | Controls |      |      |                       |      |      |
|                          | Observed |      |      | Predicted             |      |      | Observed |      |      | Predicted             |      |      |
| Time since index date    | Number   | Mean | SD   | Time since index date | Mean | SE   | Number   | Mean | SD   | Time since index date | Mean | SE   |
| 0                        | 21       | 6,57 | 2,15 | 0,00                  | 6,27 | 0,18 | 174      | 5,75 | 1,08 | 0,00                  | 5,82 | 0,05 |
| 1                        | 18       | 5,63 | 0,96 | 0,61                  | 6,12 | 0,14 | 288      | 5,83 | 1,18 | 0,61                  | 5,78 | 0,04 |
| 2                        | 36       | 5,87 | 1,31 | 1,22                  | 5,99 | 0,11 | 322      | 5,66 | 1,11 | 1,22                  | 5,73 | 0,03 |
| 3                        | 35       | 5,53 | 0,94 | 1,84                  | 5,88 | 0,09 | 438      | 5,66 | 1,08 | 1,84                  | 5,69 | 0,02 |
| 4                        | 52       | 5,77 | 1,06 | 2,45                  | 5,78 | 0,08 | 662      | 5,60 | 1,17 | 2,45                  | 5,65 | 0,02 |
| 5                        | 124      | 5,55 | 1,23 | 3,06                  | 5,70 | 0,07 | 1014     | 5,53 | 1,11 | 3,06                  | 5,61 | 0,02 |
| 6                        | 146      | 5,55 | 1,14 | 3,67                  | 5,63 | 0,06 | 1487     | 5,41 | 1,12 | 3,67                  | 5,58 | 0,02 |
| 7                        | 194      | 5,47 | 1,16 | 4,29                  | 5,58 | 0,06 | 1895     | 5,40 | 1,11 | 4,29                  | 5,55 | 0,02 |
| 8                        | 181      | 5,37 | 1,00 | 4,90                  | 5,53 | 0,05 | 2089     | 5,39 | 1,09 | 4,90                  | 5,52 | 0,02 |
| 9                        | 201      | 5,33 | 1,08 | 5,51                  | 5,50 | 0,05 | 2214     | 5,41 | 1,11 | 5,51                  | 5,50 | 0,01 |
| 10                       | 229      | 5,42 | 1,25 | 6,12                  | 5,47 | 0,04 | 2453     | 5,38 | 1,07 | 6,12                  | 5,47 | 0,01 |
| 11                       | 260      | 5,46 | 1,02 | 6,73                  | 5,44 | 0,03 | 2853     | 5,36 | 1,08 | 6,73                  | 5,45 | 0,01 |
| 12                       | 360      | 5,39 | 1,09 | 7,35                  | 5,43 | 0,03 | 3098     | 5,34 | 1,08 | 7,35                  | 5,44 | 0,01 |
| 13                       | 328      | 5,39 | 1,09 | 7,96                  | 5,41 | 0,02 | 3511     | 5,35 | 1,09 | 7,96                  | 5,42 | 0,01 |
| 14                       | 374      | 5,31 | 1,06 | 8,57                  | 5,40 | 0,02 | 3717     | 5,30 | 1,07 | 8,57                  | 5,40 | 0,01 |
| 15                       | 411      | 5,39 | 1,09 | 9,18                  | 5,39 | 0,02 | 3816     | 5,31 | 1,09 | 9,18                  | 5,39 | 0,01 |
| 16                       | 418      | 5,30 | 1,02 | 9,80                  | 5,39 | 0,02 | 4194     | 5,30 | 1,07 | 9,80                  | 5,38 | 0,01 |
| 17                       | 444      | 5,29 | 1,07 | 10,41                 | 5,39 | 0,02 | 4240     | 5,27 | 1,06 | 10,41                 | 5,37 | 0,01 |
| 18                       | 462      | 5,24 | 1,08 | 11,02                 | 5,38 | 0,02 | 4451     | 5,27 | 1,07 | 11,02                 | 5,36 | 0,01 |
| 19                       | 457      | 5,22 | 1,11 | 11,63                 | 5,38 | 0,02 | 4834     | 5,24 | 1,06 | 11,63                 | 5,35 | 0,01 |
| 20                       | 489      | 5,27 | 1,09 | 12,24                 | 5,37 | 0,02 | 4841     | 5,22 | 1,05 | 12,24                 | 5,34 | 0,01 |
| 21                       | 521      | 5,12 | 1,08 | 12,86                 | 5,37 | 0,02 | 4745     | 5,19 | 1,06 | 12,86                 | 5,33 | 0,01 |
| 22                       | 501      | 5,16 | 1,11 | 13,47                 | 5,37 | 0,01 | 4612     | 5,17 | 1,06 | 13,47                 | 5,32 | 0,01 |
| 23                       | 481      | 5,10 | 1,09 | 14,08                 | 5,36 | 0,01 | 4614     | 5,17 | 1,04 | 14,08                 | 5,31 | 0,01 |
| 24                       | 418      | 5,02 | 0,98 | 14,69                 | 5,35 | 0,01 | 4283     | 5,16 | 1,04 | 14,69                 | 5,30 | 0,00 |
| 25                       | 388      | 5,12 | 1,16 | 15,31                 | 5,34 | 0,01 | 3764     | 5,13 | 1,04 | 15,31                 | 5,30 | 0,00 |
| 26                       | 352      | 5,00 | 0,99 | 15,92                 | 5,33 | 0,01 | 3088     | 5,12 | 1,01 | 15,92                 | 5,29 | 0,00 |
| 27                       | 262      | 5,05 | 1,02 | 16,53                 | 5,32 | 0,01 | 2605     | 5,12 | 1,05 | 16,53                 | 5,28 | 0,00 |
| 28                       | 242      | 5,04 | 0,96 | 17,14                 | 5,30 | 0,01 | 2215     | 5,05 | 1,00 | 17,14                 | 5,27 | 0,00 |
| 29                       | 175      | 4,95 | 0,92 | 17,76                 | 5,29 | 0,01 | 1852     | 5,05 | 1,04 | 17,76                 | 5,26 | 0,00 |
| 30                       | 153      | 5,00 | 1,00 | 18,37                 | 5,27 | 0,01 | 1390     | 5,08 | 1,04 | 18,37                 | 5,25 | 0,00 |
|                          |          |      |      | 18,98                 | 5,25 | 0,01 |          |      |      | 18,98                 | 5,24 | 0,00 |
|                          |          |      |      | 19,59                 | 5,23 | 0,01 |          |      |      | 19,59                 | 5,23 | 0,00 |
|                          |          |      |      | 20,20                 | 5,21 | 0,02 |          |      |      | 20,20                 | 5,22 | 0,00 |
|                          |          |      |      | 20,82                 | 5,19 | 0,02 |          |      |      | 20,82                 | 5,21 | 0,00 |
|                          |          |      |      | 21,43                 | 5,17 | 0,02 |          |      |      | 21,43                 | 5,20 | 0,00 |
|                          |          |      |      | 22,04                 | 5,15 | 0,02 |          |      |      | 22,04                 | 5,19 | 0,00 |
|                          |          |      |      | 22,65                 | 5,12 | 0,02 |          |      |      | 22,65                 | 5,17 | 0,00 |
|                          |          |      |      | 23,27                 | 5,10 | 0,02 |          |      |      | 23,27                 | 5,16 | 0,00 |
|                          |          |      |      | 23,88                 | 5,08 | 0,02 |          |      |      | 23,88                 | 5,15 | 0,00 |
|                          |          |      |      | 24,49                 | 5,06 | 0,02 |          |      |      | 24,49                 | 5,14 | 0,01 |
|                          |          |      |      | 25,10                 | 5,04 | 0,02 |          |      |      | 25,10                 | 5,13 | 0,01 |
|                          |          |      |      | 25,71                 | 5,03 | 0,02 |          |      |      | 25,71                 | 5,12 | 0,01 |
|                          |          |      |      | 26,33                 | 5,01 | 0,02 |          |      |      | 26,33                 | 5,11 | 0,01 |
|                          |          |      |      | 26,94                 | 5,00 | 0,02 |          |      |      | 26,94                 | 5,10 | 0,01 |
|                          |          |      |      | 27,55                 | 5,00 | 0,02 |          |      |      | 27,55                 | 5,09 | 0,01 |
|                          |          |      |      | 28,16                 | 4,99 | 0,02 |          |      |      | 28,16                 | 5,08 | 0,01 |
|                          |          |      |      | 28,78                 | 4,99 | 0,03 |          |      |      | 28,78                 | 5,07 | 0,01 |
|                          |          |      |      | 29,39                 | 5,00 | 0,03 |          |      |      | 29,39                 | 5,07 | 0,01 |
|                          |          |      |      | 30,00                 | 5,01 | 0,04 |          |      |      | 30,00                 | 5,06 | 0,02 |

| Stress-related disorders |          |       |      |                       |       |      |          |       |      |                       |       |      |
|--------------------------|----------|-------|------|-----------------------|-------|------|----------|-------|------|-----------------------|-------|------|
| Log2 Triglycerides       |          |       |      |                       |       |      |          |       |      |                       |       |      |
|                          | Cases    |       |      |                       |       |      | Controls |       |      |                       |       |      |
|                          | Observed |       |      | Predicted             |       |      | Observed |       |      | Predicted             |       |      |
| Time since index date    | Number   | Mean  | SD   | Time since index date | Mean  | SE   | Number   | Mean  | SD   | Time since index date | Mean  | SE   |
| 0                        | 19       | 0,32  | 0,82 | 0,00                  | 0,37  | 0,11 | 174      | 0,24  | 0,89 | 0,00                  | 0,23  | 0,03 |
| 1                        | 16       | 0,34  | 1,09 | 0,61                  | 0,35  | 0,09 | 285      | 0,16  | 0,92 | 0,61                  | 0,21  | 0,02 |
| 2                        | 36       | 0,40  | 0,82 | 1,22                  | 0,33  | 0,07 | 323      | 0,22  | 0,88 | 1,22                  | 0,20  | 0,02 |
| 3                        | 35       | 0,19  | 1,04 | 1,84                  | 0,31  | 0,06 | 438      | 0,15  | 0,84 | 1,84                  | 0,19  | 0,02 |
| 4                        | 52       | 0,47  | 0,88 | 2,45                  | 0,29  | 0,05 | 658      | 0,16  | 0,88 | 2,45                  | 0,17  | 0,01 |
| 5                        | 124      | 0,08  | 0,81 | 3,06                  | 0,27  | 0,05 | 1006     | 0,15  | 0,83 | 3,06                  | 0,16  | 0,01 |
| 6                        | 143      | 0,11  | 0,81 | 3,67                  | 0,25  | 0,05 | 1480     | 0,07  | 0,82 | 3,67                  | 0,15  | 0,01 |
| 7                        | 194      | 0,19  | 0,75 | 4,29                  | 0,24  | 0,05 | 1879     | 0,12  | 0,82 | 4,29                  | 0,14  | 0,01 |
| 8                        | 180      | 0,14  | 0,75 | 4,90                  | 0,22  | 0,05 | 2077     | 0,07  | 0,80 | 4,90                  | 0,13  | 0,01 |
| 9                        | 198      | 0,11  | 0,80 | 5,51                  | 0,20  | 0,05 | 2209     | 0,09  | 0,85 | 5,51                  | 0,12  | 0,01 |
| 10                       | 225      | 0,07  | 0,80 | 6,12                  | 0,19  | 0,04 | 2455     | 0,07  | 0,80 | 6,12                  | 0,12  | 0,01 |
| 11                       | 258      | 0,13  | 0,79 | 6,73                  | 0,17  | 0,04 | 2842     | 0,09  | 0,83 | 6,73                  | 0,11  | 0,01 |
| 12                       | 357      | 0,11  | 0,85 | 7,35                  | 0,16  | 0,03 | 3079     | 0,07  | 0,80 | 7,35                  | 0,10  | 0,01 |
| 13                       | 326      | 0,11  | 0,83 | 7,96                  | 0,15  | 0,03 | 3496     | 0,04  | 0,82 | 7,96                  | 0,09  | 0,01 |
| 14                       | 371      | 0,08  | 0,86 | 8,57                  | 0,14  | 0,03 | 3705     | 0,02  | 0,81 | 8,57                  | 0,09  | 0,01 |
| 15                       | 408      | 0,09  | 0,82 | 9,18                  | 0,13  | 0,02 | 3803     | 0,01  | 0,80 | 9,18                  | 0,08  | 0,01 |
| 16                       | 414      | 0,03  | 0,80 | 9,80                  | 0,12  | 0,02 | 4170     | -0,01 | 0,81 | 9,80                  | 0,07  | 0,01 |
| 17                       | 434      | 0,00  | 0,82 | 10,41                 | 0,11  | 0,02 | 4228     | -0,02 | 0,80 | 10,41                 | 0,07  | 0,01 |
| 18                       | 458      | -0,02 | 0,77 | 11,02                 | 0,10  | 0,02 | 4437     | 0,00  | 0,81 | 11,02                 | 0,06  | 0,01 |
| 19                       | 448      | 0,06  | 0,77 | 11,63                 | 0,09  | 0,01 | 4805     | -0,02 | 0,79 | 11,63                 | 0,05  | 0,01 |
| 20                       | 484      | 0,04  | 0,84 | 12,24                 | 0,09  | 0,01 | 4815     | -0,05 | 0,78 | 12,24                 | 0,05  | 0,01 |
| 21                       | 519      | -0,03 | 0,86 | 12,86                 | 0,08  | 0,01 | 4711     | -0,04 | 0,79 | 12,86                 | 0,04  | 0,00 |
| 22                       | 502      | 0,04  | 0,84 | 13,47                 | 0,07  | 0,01 | 4575     | -0,04 | 0,78 | 13,47                 | 0,03  | 0,00 |
| 23                       | 478      | 0,01  | 0,82 | 14,08                 | 0,07  | 0,01 | 4594     | -0,07 | 0,78 | 14,08                 | 0,03  | 0,00 |
| 24                       | 417      | -0,07 | 0,79 | 14,69                 | 0,06  | 0,01 | 4269     | -0,08 | 0,79 | 14,69                 | 0,02  | 0,00 |
| 25                       | 388      | -0,10 | 0,81 | 15,31                 | 0,06  | 0,01 | 3751     | -0,07 | 0,77 | 15,31                 | 0,02  | 0,00 |
| 26                       | 351      | -0,10 | 0,80 | 15,92                 | 0,05  | 0,01 | 3074     | -0,11 | 0,78 | 15,92                 | 0,01  | 0,00 |
| 27                       | 261      | -0,08 | 0,82 | 16,53                 | 0,05  | 0,01 | 2604     | -0,12 | 0,77 | 16,53                 | 0,00  | 0,00 |
| 28                       | 241      | -0,16 | 0,76 | 17,14                 | 0,04  | 0,01 | 2212     | -0,17 | 0,73 | 17,14                 | 0,00  | 0,00 |
| 29                       | 175      | -0,17 | 0,79 | 17,76                 | 0,03  | 0,01 | 1851     | -0,16 | 0,73 | 17,76                 | -0,01 | 0,00 |
| 30                       | 153      | -0,18 | 0,70 | 18,37                 | 0,03  | 0,01 | 1390     | -0,15 | 0,74 | 18,37                 | -0,02 | 0,00 |
|                          |          |       |      | 18,98                 | 0,02  | 0,01 |          |       |      | 18,98                 | -0,02 | 0,00 |
|                          |          |       |      | 19,59                 | 0,02  | 0,01 |          |       |      | 19,59                 | -0,03 | 0,00 |
|                          |          |       |      | 20,20                 | 0,01  | 0,01 |          |       |      | 20,20                 | -0,04 | 0,00 |
|                          |          |       |      | 20,82                 | 0,00  | 0,01 |          |       |      | 20,82                 | -0,04 | 0,00 |
|                          |          |       |      | 21,43                 | -0,01 | 0,01 |          |       |      | 21,43                 | -0,05 | 0,00 |
|                          |          |       |      | 22,04                 | -0,01 | 0,01 |          |       |      | 22,04                 | -0,06 | 0,00 |
|                          |          |       |      | 22,65                 | -0,02 | 0,01 |          |       |      | 22,65                 | -0,06 | 0,00 |
|                          |          |       |      | 23,27                 | -0,03 | 0,01 |          |       |      | 23,27                 | -0,07 | 0,00 |
|                          |          |       |      | 23,88                 | -0,04 | 0,01 |          |       |      | 23,88                 | -0,08 | 0,00 |
|                          |          |       |      | 24,49                 | -0,06 | 0,01 |          |       |      | 24,49                 | -0,09 | 0,00 |
|                          |          |       |      | 25,10                 | -0,07 | 0,01 |          |       |      | 25,10                 | -0,10 | 0,00 |
|                          |          |       |      | 25,71                 | -0,08 | 0,01 |          |       |      | 25,71                 | -0,10 | 0,00 |
|                          |          |       |      | 26,33                 | -0,10 | 0,01 |          |       |      | 26,33                 | -0,11 | 0,01 |
|                          |          |       |      | 26,94                 | -0,11 | 0,01 |          |       |      | 26,94                 | -0,12 | 0,01 |
|                          |          |       |      | 27,55                 | -0,13 | 0,01 |          |       |      | 27,55                 | -0,13 | 0,01 |
|                          |          |       |      | 28,16                 | -0,14 | 0,01 |          |       |      | 28,16                 | -0,14 | 0,01 |
|                          |          |       |      | 28,78                 | -0,16 | 0,02 |          |       |      | 28,78                 | -0,15 | 0,01 |
|                          |          |       |      | 29,39                 | -0,18 | 0,02 |          |       |      | 29,39                 | -0,16 | 0,01 |
|                          |          |       |      | 30,00                 | -0,20 | 0,02 |          |       |      | 30,00                 | -0,17 | 0,01 |

| Stress-related disorders |          |      |      |                       |      |      |          |      |      |                       |      |      |
|--------------------------|----------|------|------|-----------------------|------|------|----------|------|------|-----------------------|------|------|
| LDL-C                    |          |      |      |                       |      |      |          |      |      |                       |      |      |
| Time since index date    | Cases    |      |      |                       |      |      | Controls |      |      |                       |      |      |
|                          | Observed |      |      | Predicted             |      |      | Observed |      |      | Predicted             |      |      |
|                          | Number   | Mean | SD   | Time since index date | Mean | SE   | Number   | Mean | SD   | Time since index date | Mean | SE   |
| 0                        | 7        | 3,93 | 1,10 | 0,00                  | 3,84 | 0,29 | 73       | 3,90 | 1,02 | 0,00                  | 3,86 | 0,05 |
| 1                        | 7        | 3,49 | 1,00 | 0,61                  | 3,78 | 0,22 | 113      | 3,74 | 1,14 | 0,61                  | 3,81 | 0,04 |
| 2                        | 15       | 3,97 | 1,18 | 1,22                  | 3,73 | 0,17 | 148      | 3,62 | 0,99 | 1,22                  | 3,76 | 0,03 |
| 3                        | 22       | 3,25 | 0,83 | 1,84                  | 3,69 | 0,14 | 169      | 3,71 | 0,97 | 1,84                  | 3,72 | 0,02 |
| 4                        | 15       | 3,82 | 1,10 | 2,45                  | 3,65 | 0,12 | 236      | 3,70 | 1,02 | 2,45                  | 3,68 | 0,02 |
| 5                        | 40       | 3,59 | 1,42 | 3,06                  | 3,62 | 0,11 | 384      | 3,55 | 1,01 | 3,06                  | 3,65 | 0,02 |
| 6                        | 54       | 3,61 | 0,99 | 3,67                  | 3,58 | 0,11 | 555      | 3,53 | 1,10 | 3,67                  | 3,62 | 0,02 |
| 7                        | 64       | 3,48 | 1,13 | 4,29                  | 3,56 | 0,10 | 679      | 3,43 | 1,00 | 4,29                  | 3,59 | 0,02 |
| 8                        | 61       | 3,40 | 0,99 | 4,90                  | 3,54 | 0,09 | 771      | 3,48 | 1,00 | 4,90                  | 3,57 | 0,02 |
| 9                        | 61       | 3,23 | 0,90 | 5,51                  | 3,52 | 0,08 | 785      | 3,48 | 1,10 | 5,51                  | 3,54 | 0,02 |
| 10                       | 80       | 3,51 | 1,11 | 6,12                  | 3,50 | 0,08 | 903      | 3,42 | 1,03 | 6,12                  | 3,52 | 0,02 |
| 11                       | 88       | 3,51 | 0,89 | 6,73                  | 3,49 | 0,07 | 1013     | 3,40 | 1,02 | 6,73                  | 3,50 | 0,02 |
| 12                       | 122      | 3,38 | 1,03 | 7,35                  | 3,48 | 0,06 | 1060     | 3,39 | 1,00 | 7,35                  | 3,49 | 0,02 |
| 13                       | 94       | 3,35 | 0,98 | 7,96                  | 3,47 | 0,06 | 1179     | 3,40 | 1,04 | 7,96                  | 3,47 | 0,02 |
| 14                       | 113      | 3,34 | 0,98 | 8,57                  | 3,46 | 0,05 | 1218     | 3,37 | 1,03 | 8,57                  | 3,46 | 0,01 |
| 15                       | 123      | 3,59 | 1,11 | 9,18                  | 3,45 | 0,05 | 1255     | 3,39 | 1,01 | 9,18                  | 3,45 | 0,01 |
| 16                       | 130      | 3,21 | 0,91 | 9,80                  | 3,45 | 0,04 | 1391     | 3,37 | 1,00 | 9,80                  | 3,44 | 0,01 |
| 17                       | 150      | 3,48 | 1,02 | 10,41                 | 3,44 | 0,04 | 1389     | 3,35 | 1,05 | 10,41                 | 3,43 | 0,01 |
| 18                       | 153      | 3,41 | 1,06 | 11,02                 | 3,44 | 0,04 | 1451     | 3,33 | 1,01 | 11,02                 | 3,42 | 0,01 |
| 19                       | 145      | 3,28 | 1,02 | 11,63                 | 3,43 | 0,04 | 1492     | 3,30 | 1,03 | 11,63                 | 3,41 | 0,01 |
| 20                       | 136      | 3,42 | 1,13 | 12,24                 | 3,43 | 0,04 | 1505     | 3,29 | 1,02 | 12,24                 | 3,40 | 0,01 |
| 21                       | 166      | 3,19 | 1,00 | 12,86                 | 3,42 | 0,04 | 1462     | 3,27 | 1,03 | 12,86                 | 3,40 | 0,01 |
| 22                       | 163      | 3,27 | 1,08 | 13,47                 | 3,42 | 0,04 | 1408     | 3,27 | 1,03 | 13,47                 | 3,39 | 0,01 |
| 23                       | 156      | 3,11 | 0,95 | 14,08                 | 3,41 | 0,04 | 1425     | 3,24 | 1,06 | 14,08                 | 3,38 | 0,01 |
| 24                       | 136      | 3,03 | 0,89 | 14,69                 | 3,40 | 0,04 | 1230     | 3,21 | 1,05 | 14,69                 | 3,37 | 0,00 |
| 25                       | 110      | 3,17 | 1,19 | 15,31                 | 3,40 | 0,04 | 1052     | 3,16 | 0,98 | 15,31                 | 3,37 | 0,00 |
| 26                       | 101      | 3,00 | 0,81 | 15,92                 | 3,39 | 0,04 | 837      | 3,17 | 0,99 | 15,92                 | 3,36 | 0,00 |
| 27                       | 61       | 3,06 | 0,88 | 16,53                 | 3,38 | 0,04 | 694      | 3,19 | 1,01 | 16,53                 | 3,35 | 0,00 |
| 28                       | 72       | 3,10 | 0,94 | 17,14                 | 3,36 | 0,04 | 564      | 3,10 | 0,94 | 17,14                 | 3,34 | 0,00 |
| 29                       | 45       | 3,00 | 0,88 | 17,76                 | 3,35 | 0,04 | 465      | 3,11 | 0,98 | 17,76                 | 3,33 | 0,00 |
| 30                       | 25       | 2,97 | 1,03 | 18,37                 | 3,33 | 0,04 | 321      | 3,14 | 1,05 | 18,37                 | 3,32 | 0,00 |
|                          |          |      |      | 18,98                 | 3,32 | 0,04 |          |      |      | 18,98                 | 3,31 | 0,00 |
|                          |          |      |      | 19,59                 | 3,30 | 0,03 |          |      |      | 19,59                 | 3,30 | 0,00 |
|                          |          |      |      | 20,20                 | 3,28 | 0,03 |          |      |      | 20,20                 | 3,29 | 0,00 |
|                          |          |      |      | 20,82                 | 3,26 | 0,03 |          |      |      | 20,82                 | 3,28 | 0,00 |
|                          |          |      |      | 21,43                 | 3,24 | 0,03 |          |      |      | 21,43                 | 3,26 | 0,01 |
|                          |          |      |      | 22,04                 | 3,22 | 0,03 |          |      |      | 22,04                 | 3,25 | 0,01 |
|                          |          |      |      | 22,65                 | 3,19 | 0,03 |          |      |      | 22,65                 | 3,24 | 0,01 |
|                          |          |      |      | 23,27                 | 3,17 | 0,03 |          |      |      | 23,27                 | 3,23 | 0,01 |
|                          |          |      |      | 23,88                 | 3,15 | 0,03 |          |      |      | 23,88                 | 3,21 | 0,01 |
|                          |          |      |      | 24,49                 | 3,12 | 0,03 |          |      |      | 24,49                 | 3,20 | 0,01 |
|                          |          |      |      | 25,10                 | 3,10 | 0,03 |          |      |      | 25,10                 | 3,19 | 0,01 |
|                          |          |      |      | 25,71                 | 3,08 | 0,03 |          |      |      | 25,71                 | 3,17 | 0,01 |
|                          |          |      |      | 26,33                 | 3,06 | 0,03 |          |      |      | 26,33                 | 3,16 | 0,01 |
|                          |          |      |      | 26,94                 | 3,04 | 0,03 |          |      |      | 26,94                 | 3,15 | 0,01 |
|                          |          |      |      | 27,55                 | 3,03 | 0,03 |          |      |      | 27,55                 | 3,14 | 0,01 |
|                          |          |      |      | 28,16                 | 3,01 | 0,03 |          |      |      | 28,16                 | 3,13 | 0,01 |
|                          |          |      |      | 28,78                 | 3,00 | 0,03 |          |      |      | 28,78                 | 3,13 | 0,01 |
|                          |          |      |      | 29,39                 | 3,00 | 0,04 |          |      |      | 29,39                 | 3,12 | 0,02 |
|                          |          |      |      | 30,00                 | 3,00 | 0,05 |          |      |      | 30,00                 | 3,12 | 0,02 |



| Stress-related disorders |          |      |      |                       |      |      |          |      |      |                       |      |      |
|--------------------------|----------|------|------|-----------------------|------|------|----------|------|------|-----------------------|------|------|
| HDL-C                    |          |      |      |                       |      |      |          |      |      |                       |      |      |
| Time since index date    | Cases    |      |      |                       |      |      | Controls |      |      |                       |      |      |
|                          | Observed |      |      | Predicted             |      |      | Observed |      |      | Predicted             |      |      |
|                          | Number   | Mean | SD   | Time since index date | Mean | SE   | Number   | Mean | SD   | Time since index date | Mean | SE   |
| 0                        | 7        | 1,76 | 0,38 | 0,00                  | 1,66 | 0,07 | 76       | 1,50 | 0,32 | 0,00                  | 1,52 | 0,01 |
| 1                        | 7        | 1,58 | 0,39 | 0,61                  | 1,64 | 0,05 | 120      | 1,54 | 0,38 | 0,61                  | 1,52 | 0,01 |
| 2                        | 16       | 1,46 | 0,35 | 1,22                  | 1,62 | 0,04 | 146      | 1,52 | 0,39 | 1,22                  | 1,52 | 0,01 |
| 3                        | 22       | 1,63 | 0,42 | 1,84                  | 1,60 | 0,03 | 164      | 1,54 | 0,39 | 1,84                  | 1,53 | 0,01 |
| 4                        | 14       | 1,53 | 0,43 | 2,45                  | 1,59 | 0,03 | 239      | 1,54 | 0,41 | 2,45                  | 1,53 | 0,01 |
| 5                        | 43       | 1,53 | 0,32 | 3,06                  | 1,58 | 0,03 | 391      | 1,53 | 0,35 | 3,06                  | 1,53 | 0,01 |
| 6                        | 55       | 1,58 | 0,38 | 3,67                  | 1,58 | 0,03 | 577      | 1,57 | 0,36 | 3,67                  | 1,54 | 0,01 |
| 7                        | 69       | 1,59 | 0,46 | 4,29                  | 1,57 | 0,03 | 705      | 1,55 | 0,39 | 4,29                  | 1,54 | 0,01 |
| 8                        | 60       | 1,66 | 0,47 | 4,90                  | 1,57 | 0,03 | 804      | 1,55 | 0,37 | 4,90                  | 1,54 | 0,01 |
| 9                        | 68       | 1,53 | 0,40 | 5,51                  | 1,56 | 0,02 | 826      | 1,56 | 0,40 | 5,51                  | 1,55 | 0,00 |
| 10                       | 80       | 1,53 | 0,41 | 6,12                  | 1,56 | 0,02 | 926      | 1,55 | 0,37 | 6,12                  | 1,55 | 0,00 |
| 11                       | 92       | 1,60 | 0,42 | 6,73                  | 1,56 | 0,02 | 1051     | 1,54 | 0,36 | 6,73                  | 1,55 | 0,00 |
| 12                       | 128      | 1,54 | 0,41 | 7,35                  | 1,56 | 0,02 | 1093     | 1,56 | 0,38 | 7,35                  | 1,55 | 0,00 |
| 13                       | 97       | 1,60 | 0,38 | 7,96                  | 1,56 | 0,02 | 1232     | 1,58 | 0,38 | 7,96                  | 1,55 | 0,00 |
| 14                       | 114      | 1,55 | 0,35 | 8,57                  | 1,56 | 0,02 | 1251     | 1,56 | 0,38 | 8,57                  | 1,56 | 0,00 |
| 15                       | 129      | 1,51 | 0,36 | 9,18                  | 1,56 | 0,02 | 1288     | 1,58 | 0,38 | 9,18                  | 1,56 | 0,00 |
| 16                       | 132      | 1,59 | 0,38 | 9,80                  | 1,56 | 0,02 | 1436     | 1,56 | 0,38 | 9,80                  | 1,56 | 0,00 |
| 17                       | 155      | 1,53 | 0,37 | 10,41                 | 1,55 | 0,02 | 1414     | 1,56 | 0,37 | 10,41                 | 1,56 | 0,00 |
| 18                       | 152      | 1,57 | 0,38 | 11,02                 | 1,55 | 0,01 | 1492     | 1,57 | 0,36 | 11,02                 | 1,56 | 0,00 |
| 19                       | 148      | 1,54 | 0,37 | 11,63                 | 1,55 | 0,01 | 1579     | 1,56 | 0,37 | 11,63                 | 1,56 | 0,00 |
| 20                       | 144      | 1,54 | 0,43 | 12,24                 | 1,55 | 0,01 | 1605     | 1,57 | 0,37 | 12,24                 | 1,56 | 0,00 |
| 21                       | 181      | 1,50 | 0,39 | 12,86                 | 1,55 | 0,01 | 1513     | 1,57 | 0,37 | 12,86                 | 1,56 | 0,00 |
| 22                       | 166      | 1,55 | 0,35 | 13,47                 | 1,55 | 0,01 | 1482     | 1,55 | 0,37 | 13,47                 | 1,56 | 0,00 |
| 23                       | 159      | 1,59 | 0,40 | 14,08                 | 1,55 | 0,01 | 1483     | 1,59 | 0,38 | 14,08                 | 1,56 | 0,00 |
| 24                       | 138      | 1,66 | 0,35 | 14,69                 | 1,55 | 0,01 | 1305     | 1,58 | 0,38 | 14,69                 | 1,56 | 0,00 |
| 25                       | 112      | 1,62 | 0,29 | 15,31                 | 1,55 | 0,01 | 1094     | 1,58 | 0,38 | 15,31                 | 1,56 | 0,00 |
| 26                       | 100      | 1,66 | 0,36 | 15,92                 | 1,55 | 0,01 | 852      | 1,60 | 0,38 | 15,92                 | 1,56 | 0,00 |
| 27                       | 58       | 1,59 | 0,39 | 16,53                 | 1,55 | 0,01 | 684      | 1,64 | 0,39 | 16,53                 | 1,56 | 0,00 |
| 28                       | 70       | 1,71 | 0,33 | 17,14                 | 1,55 | 0,01 | 547      | 1,61 | 0,37 | 17,14                 | 1,56 | 0,00 |
| 29                       | 45       | 1,59 | 0,38 | 17,76                 | 1,56 | 0,01 | 452      | 1,60 | 0,34 | 17,76                 | 1,56 | 0,00 |
| 30                       | 25       | 1,62 | 0,31 | 18,37                 | 1,56 | 0,01 | 308      | 1,66 | 0,35 | 18,37                 | 1,56 | 0,00 |
|                          |          |      |      | 18,98                 | 1,56 | 0,01 |          |      |      | 18,98                 | 1,57 | 0,00 |
|                          |          |      |      | 19,59                 | 1,56 | 0,01 |          |      |      | 19,59                 | 1,57 | 0,00 |
|                          |          |      |      | 20,20                 | 1,57 | 0,01 |          |      |      | 20,20                 | 1,57 | 0,00 |
|                          |          |      |      | 20,82                 | 1,57 | 0,01 |          |      |      | 20,82                 | 1,57 | 0,00 |
|                          |          |      |      | 21,43                 | 1,58 | 0,01 |          |      |      | 21,43                 | 1,57 | 0,00 |
|                          |          |      |      | 22,04                 | 1,58 | 0,01 |          |      |      | 22,04                 | 1,57 | 0,00 |
|                          |          |      |      | 22,65                 | 1,59 | 0,01 |          |      |      | 22,65                 | 1,57 | 0,01 |
|                          |          |      |      | 23,27                 | 1,59 | 0,01 |          |      |      | 23,27                 | 1,58 | 0,01 |
|                          |          |      |      | 23,88                 | 1,60 | 0,01 |          |      |      | 23,88                 | 1,58 | 0,01 |
|                          |          |      |      | 24,49                 | 1,61 | 0,02 |          |      |      | 24,49                 | 1,58 | 0,01 |
|                          |          |      |      | 25,10                 | 1,61 | 0,02 |          |      |      | 25,10                 | 1,59 | 0,01 |
|                          |          |      |      | 25,71                 | 1,62 | 0,02 |          |      |      | 25,71                 | 1,59 | 0,01 |
|                          |          |      |      | 26,33                 | 1,62 | 0,02 |          |      |      | 26,33                 | 1,60 | 0,01 |
|                          |          |      |      | 26,94                 | 1,63 | 0,02 |          |      |      | 26,94                 | 1,60 | 0,01 |
|                          |          |      |      | 27,55                 | 1,63 | 0,02 |          |      |      | 27,55                 | 1,61 | 0,01 |
|                          |          |      |      | 28,16                 | 1,63 | 0,03 |          |      |      | 28,16                 | 1,62 | 0,01 |
|                          |          |      |      | 28,78                 | 1,63 | 0,03 |          |      |      | 28,78                 | 1,63 | 0,01 |
|                          |          |      |      | 29,39                 | 1,63 | 0,04 |          |      |      | 29,39                 | 1,64 | 0,01 |
|                          |          |      |      | 30,00                 | 1,63 | 0,06 |          |      |      | 30,00                 | 1,65 | 0,01 |

| Stress-related disorders |          |      |      |                       |      |      |          |      |      |                       |      |      |
|--------------------------|----------|------|------|-----------------------|------|------|----------|------|------|-----------------------|------|------|
| ApoA-I                   |          |      |      |                       |      |      |          |      |      |                       |      |      |
| Time since index date    | Cases    |      |      |                       |      |      | Controls |      |      |                       |      |      |
|                          | Observed |      |      | Predicted             |      |      | Observed |      |      | Predicted             |      |      |
|                          | Number   | Mean | SD   | Time since index date | Mean | SE   | Number   | Mean | SD   | Time since index date | Mean | SE   |
| 0                        | 4        | 1,59 | 0,27 | 0,00                  | 1,61 | 0,06 | 61       | 1,40 | 0,18 | 0,00                  | 1,42 | 0,01 |
| 1                        | 5        | 1,64 | 0,19 | 0,61                  | 1,59 | 0,04 | 109      | 1,43 | 0,21 | 0,61                  | 1,42 | 0,01 |
| 2                        | 12       | 1,48 | 0,16 | 1,22                  | 1,57 | 0,03 | 137      | 1,44 | 0,23 | 1,22                  | 1,42 | 0,00 |
| 3                        | 20       | 1,52 | 0,24 | 1,84                  | 1,54 | 0,03 | 155      | 1,41 | 0,24 | 1,84                  | 1,42 | 0,00 |
| 4                        | 10       | 1,56 | 0,23 | 2,45                  | 1,53 | 0,03 | 210      | 1,41 | 0,23 | 2,45                  | 1,42 | 0,00 |
| 5                        | 38       | 1,38 | 0,20 | 3,06                  | 1,51 | 0,02 | 331      | 1,41 | 0,20 | 3,06                  | 1,42 | 0,00 |
| 6                        | 40       | 1,44 | 0,17 | 3,67                  | 1,49 | 0,02 | 448      | 1,42 | 0,21 | 3,67                  | 1,42 | 0,00 |
| 7                        | 47       | 1,46 | 0,29 | 4,29                  | 1,48 | 0,02 | 563      | 1,40 | 0,23 | 4,29                  | 1,42 | 0,00 |
| 8                        | 46       | 1,44 | 0,25 | 4,90                  | 1,47 | 0,02 | 647      | 1,41 | 0,21 | 4,90                  | 1,42 | 0,00 |
| 9                        | 53       | 1,40 | 0,23 | 5,51                  | 1,46 | 0,02 | 658      | 1,42 | 0,22 | 5,51                  | 1,41 | 0,00 |
| 10                       | 68       | 1,39 | 0,25 | 6,12                  | 1,45 | 0,02 | 742      | 1,40 | 0,21 | 6,12                  | 1,41 | 0,00 |
| 11                       | 64       | 1,42 | 0,23 | 6,73                  | 1,44 | 0,02 | 857      | 1,40 | 0,20 | 6,73                  | 1,41 | 0,00 |
| 12                       | 105      | 1,41 | 0,23 | 7,35                  | 1,43 | 0,02 | 897      | 1,40 | 0,22 | 7,35                  | 1,41 | 0,00 |
| 13                       | 78       | 1,47 | 0,23 | 7,96                  | 1,43 | 0,01 | 1032     | 1,42 | 0,22 | 7,96                  | 1,41 | 0,00 |
| 14                       | 90       | 1,40 | 0,21 | 8,57                  | 1,42 | 0,01 | 1041     | 1,40 | 0,21 | 8,57                  | 1,41 | 0,00 |
| 15                       | 109      | 1,39 | 0,20 | 9,18                  | 1,42 | 0,01 | 1094     | 1,41 | 0,22 | 9,18                  | 1,41 | 0,00 |
| 16                       | 116      | 1,41 | 0,21 | 9,80                  | 1,41 | 0,01 | 1194     | 1,41 | 0,22 | 9,80                  | 1,41 | 0,00 |
| 17                       | 136      | 1,39 | 0,20 | 10,41                 | 1,41 | 0,01 | 1201     | 1,40 | 0,21 | 10,41                 | 1,41 | 0,00 |
| 18                       | 127      | 1,39 | 0,21 | 11,02                 | 1,41 | 0,01 | 1260     | 1,40 | 0,21 | 11,02                 | 1,41 | 0,00 |
| 19                       | 122      | 1,41 | 0,21 | 11,63                 | 1,41 | 0,01 | 1311     | 1,40 | 0,21 | 11,63                 | 1,41 | 0,00 |
| 20                       | 126      | 1,44 | 0,28 | 12,24                 | 1,41 | 0,01 | 1324     | 1,40 | 0,21 | 12,24                 | 1,41 | 0,00 |
| 21                       | 160      | 1,39 | 0,22 | 12,86                 | 1,41 | 0,01 | 1253     | 1,40 | 0,21 | 12,86                 | 1,40 | 0,00 |
| 22                       | 147      | 1,40 | 0,20 | 13,47                 | 1,41 | 0,01 | 1248     | 1,39 | 0,21 | 13,47                 | 1,40 | 0,00 |
| 23                       | 139      | 1,42 | 0,24 | 14,08                 | 1,41 | 0,01 | 1269     | 1,41 | 0,22 | 14,08                 | 1,40 | 0,00 |
| 24                       | 128      | 1,44 | 0,22 | 14,69                 | 1,41 | 0,01 | 1163     | 1,42 | 0,22 | 14,69                 | 1,40 | 0,00 |
| 25                       | 105      | 1,43 | 0,19 | 15,31                 | 1,41 | 0,01 | 1013     | 1,41 | 0,22 | 15,31                 | 1,40 | 0,00 |
| 26                       | 98       | 1,45 | 0,24 | 15,92                 | 1,41 | 0,01 | 832      | 1,41 | 0,22 | 15,92                 | 1,40 | 0,00 |
| 27                       | 60       | 1,41 | 0,24 | 16,53                 | 1,41 | 0,01 | 693      | 1,44 | 0,23 | 16,53                 | 1,40 | 0,00 |
| 28                       | 70       | 1,47 | 0,20 | 17,14                 | 1,41 | 0,01 | 563      | 1,41 | 0,23 | 17,14                 | 1,40 | 0,00 |
| 29                       | 45       | 1,40 | 0,23 | 17,76                 | 1,41 | 0,01 | 466      | 1,41 | 0,20 | 17,76                 | 1,40 | 0,00 |
| 30                       | 25       | 1,42 | 0,17 | 18,37                 | 1,41 | 0,01 | 323      | 1,44 | 0,21 | 18,37                 | 1,40 | 0,00 |
|                          |          |      |      | 18,98                 | 1,41 | 0,01 |          |      |      | 18,98                 | 1,40 | 0,00 |
|                          |          |      |      | 19,59                 | 1,41 | 0,01 |          |      |      | 19,59                 | 1,40 | 0,00 |
|                          |          |      |      | 20,20                 | 1,42 | 0,01 |          |      |      | 20,20                 | 1,40 | 0,00 |
|                          |          |      |      | 20,82                 | 1,42 | 0,01 |          |      |      | 20,82                 | 1,40 | 0,00 |
|                          |          |      |      | 21,43                 | 1,42 | 0,01 |          |      |      | 21,43                 | 1,40 | 0,00 |
|                          |          |      |      | 22,04                 | 1,42 | 0,01 |          |      |      | 22,04                 | 1,41 | 0,00 |
|                          |          |      |      | 22,65                 | 1,42 | 0,01 |          |      |      | 22,65                 | 1,41 | 0,00 |
|                          |          |      |      | 23,27                 | 1,43 | 0,01 |          |      |      | 23,27                 | 1,41 | 0,00 |
|                          |          |      |      | 23,88                 | 1,43 | 0,01 |          |      |      | 23,88                 | 1,41 | 0,00 |
|                          |          |      |      | 24,49                 | 1,43 | 0,01 |          |      |      | 24,49                 | 1,41 | 0,00 |
|                          |          |      |      | 25,10                 | 1,43 | 0,01 |          |      |      | 25,10                 | 1,41 | 0,00 |
|                          |          |      |      | 25,71                 | 1,43 | 0,01 |          |      |      | 25,71                 | 1,41 | 0,00 |
|                          |          |      |      | 26,33                 | 1,43 | 0,01 |          |      |      | 26,33                 | 1,42 | 0,00 |
|                          |          |      |      | 26,94                 | 1,43 | 0,01 |          |      |      | 26,94                 | 1,42 | 0,00 |
|                          |          |      |      | 27,55                 | 1,43 | 0,01 |          |      |      | 27,55                 | 1,42 | 0,01 |
|                          |          |      |      | 28,16                 | 1,43 | 0,01 |          |      |      | 28,16                 | 1,42 | 0,01 |
|                          |          |      |      | 28,78                 | 1,43 | 0,01 |          |      |      | 28,78                 | 1,43 | 0,01 |
|                          |          |      |      | 29,39                 | 1,43 | 0,02 |          |      |      | 29,39                 | 1,43 | 0,01 |
|                          |          |      |      | 30,00                 | 1,42 | 0,02 |          |      |      | 30,00                 | 1,43 | 0,01 |

| Stress-related disorders |          |      |      |                       |      |      |          |      |      |                       |      |      |
|--------------------------|----------|------|------|-----------------------|------|------|----------|------|------|-----------------------|------|------|
| ApoB                     |          |      |      |                       |      |      |          |      |      |                       |      |      |
| Time since index date    | Cases    |      |      |                       |      |      | Controls |      |      |                       |      |      |
|                          | Observed |      |      | Predicted             |      |      | Observed |      |      | Predicted             |      |      |
|                          | Number   | Mean | SD   | Time since index date | Mean | SE   | Number   | Mean | SD   | Time since index date | Mean | SE   |
| 0                        | 4        | 1,13 | 0,39 | 0,00                  | 1,29 | 0,10 | 59       | 1,17 | 0,33 | 0,00                  | 1,23 | 0,01 |
| 1                        | 5        | 1,40 | 0,39 | 0,61                  | 1,29 | 0,08 | 109      | 1,23 | 0,37 | 0,61                  | 1,22 | 0,01 |
| 2                        | 12       | 1,47 | 0,26 | 1,22                  | 1,29 | 0,06 | 125      | 1,27 | 0,42 | 1,22                  | 1,22 | 0,01 |
| 3                        | 18       | 1,15 | 0,39 | 1,84                  | 1,29 | 0,05 | 140      | 1,26 | 0,35 | 1,84                  | 1,21 | 0,01 |
| 4                        | 12       | 1,36 | 0,43 | 2,45                  | 1,28 | 0,05 | 204      | 1,24 | 0,47 | 2,45                  | 1,21 | 0,01 |
| 5                        | 40       | 1,21 | 0,43 | 3,06                  | 1,27 | 0,04 | 302      | 1,17 | 0,34 | 3,06                  | 1,20 | 0,01 |
| 6                        | 37       | 1,25 | 0,39 | 3,67                  | 1,26 | 0,04 | 404      | 1,12 | 0,35 | 3,67                  | 1,20 | 0,01 |
| 7                        | 50       | 1,13 | 0,37 | 4,29                  | 1,25 | 0,04 | 523      | 1,11 | 0,33 | 4,29                  | 1,19 | 0,01 |
| 8                        | 42       | 1,18 | 0,37 | 4,90                  | 1,24 | 0,04 | 613      | 1,15 | 0,34 | 4,90                  | 1,18 | 0,01 |
| 9                        | 48       | 1,03 | 0,28 | 5,51                  | 1,22 | 0,04 | 658      | 1,14 | 0,38 | 5,51                  | 1,18 | 0,01 |
| 10                       | 61       | 1,10 | 0,32 | 6,12                  | 1,21 | 0,03 | 712      | 1,12 | 0,34 | 6,12                  | 1,17 | 0,01 |
| 11                       | 58       | 1,11 | 0,30 | 6,73                  | 1,20 | 0,03 | 825      | 1,14 | 0,39 | 6,73                  | 1,16 | 0,01 |
| 12                       | 79       | 1,12 | 0,33 | 7,35                  | 1,19 | 0,03 | 830      | 1,11 | 0,35 | 7,35                  | 1,16 | 0,01 |
| 13                       | 67       | 1,12 | 0,32 | 7,96                  | 1,18 | 0,02 | 942      | 1,12 | 0,34 | 7,96                  | 1,15 | 0,01 |
| 14                       | 87       | 1,15 | 0,38 | 8,57                  | 1,16 | 0,02 | 964      | 1,11 | 0,35 | 8,57                  | 1,15 | 0,01 |
| 15                       | 101      | 1,16 | 0,34 | 9,18                  | 1,15 | 0,02 | 996      | 1,13 | 0,35 | 9,18                  | 1,14 | 0,01 |
| 16                       | 104      | 1,05 | 0,33 | 9,80                  | 1,14 | 0,02 | 1063     | 1,11 | 0,33 | 9,80                  | 1,14 | 0,01 |
| 17                       | 119      | 1,10 | 0,34 | 10,41                 | 1,14 | 0,02 | 1095     | 1,12 | 0,35 | 10,41                 | 1,13 | 0,01 |
| 18                       | 109      | 1,12 | 0,39 | 11,02                 | 1,13 | 0,01 | 1106     | 1,11 | 0,35 | 11,02                 | 1,13 | 0,01 |
| 19                       | 111      | 1,09 | 0,35 | 11,63                 | 1,12 | 0,01 | 1170     | 1,09 | 0,34 | 11,63                 | 1,12 | 0,01 |
| 20                       | 123      | 1,11 | 0,36 | 12,24                 | 1,12 | 0,01 | 1265     | 1,09 | 0,34 | 12,24                 | 1,12 | 0,00 |
| 21                       | 156      | 1,06 | 0,37 | 12,86                 | 1,11 | 0,01 | 1139     | 1,09 | 0,34 | 12,86                 | 1,12 | 0,00 |
| 22                       | 133      | 1,11 | 0,38 | 13,47                 | 1,11 | 0,01 | 1119     | 1,09 | 0,35 | 13,47                 | 1,11 | 0,00 |
| 23                       | 119      | 1,06 | 0,34 | 14,08                 | 1,10 | 0,01 | 1143     | 1,08 | 0,34 | 14,08                 | 1,11 | 0,00 |
| 24                       | 115      | 1,06 | 0,31 | 14,69                 | 1,10 | 0,01 | 984      | 1,07 | 0,33 | 14,69                 | 1,11 | 0,00 |
| 25                       | 92       | 1,10 | 0,38 | 15,31                 | 1,10 | 0,01 | 838      | 1,09 | 0,33 | 15,31                 | 1,11 | 0,00 |
| 26                       | 82       | 1,03 | 0,24 | 15,92                 | 1,09 | 0,01 | 675      | 1,10 | 0,31 | 15,92                 | 1,10 | 0,00 |
| 27                       | 49       | 1,04 | 0,30 | 16,53                 | 1,09 | 0,01 | 507      | 1,12 | 0,32 | 16,53                 | 1,10 | 0,00 |
| 28                       | 44       | 1,11 | 0,26 | 17,14                 | 1,09 | 0,01 | 401      | 1,11 | 0,30 | 17,14                 | 1,10 | 0,00 |
| 29                       | 31       | 1,09 | 0,26 | 17,76                 | 1,09 | 0,01 | 342      | 1,15 | 0,30 | 17,76                 | 1,10 | 0,00 |
| 30                       | 18       | 1,09 | 0,27 | 18,37                 | 1,09 | 0,01 | 239      | 1,17 | 0,32 | 18,37                 | 1,09 | 0,00 |
|                          |          |      |      | 18,98                 | 1,09 | 0,01 |          |      |      | 18,98                 | 1,09 | 0,00 |
|                          |          |      |      | 19,59                 | 1,09 | 0,01 |          |      |      | 19,59                 | 1,09 | 0,00 |
|                          |          |      |      | 20,20                 | 1,08 | 0,01 |          |      |      | 20,20                 | 1,09 | 0,00 |
|                          |          |      |      | 20,82                 | 1,08 | 0,01 |          |      |      | 20,82                 | 1,09 | 0,00 |
|                          |          |      |      | 21,43                 | 1,08 | 0,01 |          |      |      | 21,43                 | 1,09 | 0,00 |
|                          |          |      |      | 22,04                 | 1,08 | 0,01 |          |      |      | 22,04                 | 1,09 | 0,00 |
|                          |          |      |      | 22,65                 | 1,08 | 0,01 |          |      |      | 22,65                 | 1,09 | 0,00 |
|                          |          |      |      | 23,27                 | 1,08 | 0,01 |          |      |      | 23,27                 | 1,09 | 0,00 |
|                          |          |      |      | 23,88                 | 1,08 | 0,01 |          |      |      | 23,88                 | 1,09 | 0,00 |
|                          |          |      |      | 24,49                 | 1,08 | 0,01 |          |      |      | 24,49                 | 1,09 | 0,00 |
|                          |          |      |      | 25,10                 | 1,08 | 0,01 |          |      |      | 25,10                 | 1,09 | 0,00 |
|                          |          |      |      | 25,71                 | 1,08 | 0,01 |          |      |      | 25,71                 | 1,10 | 0,00 |
|                          |          |      |      | 26,33                 | 1,08 | 0,01 |          |      |      | 26,33                 | 1,10 | 0,00 |
|                          |          |      |      | 26,94                 | 1,08 | 0,01 |          |      |      | 26,94                 | 1,11 | 0,00 |
|                          |          |      |      | 27,55                 | 1,08 | 0,01 |          |      |      | 27,55                 | 1,12 | 0,01 |
|                          |          |      |      | 28,16                 | 1,08 | 0,01 |          |      |      | 28,16                 | 1,13 | 0,01 |
|                          |          |      |      | 28,78                 | 1,08 | 0,02 |          |      |      | 28,78                 | 1,14 | 0,01 |
|                          |          |      |      | 29,39                 | 1,08 | 0,02 |          |      |      | 29,39                 | 1,15 | 0,01 |
|                          |          |      |      | 30,00                 | 1,09 | 0,03 |          |      |      | 30,00                 | 1,17 | 0,01 |

| Stress-related disorders |          |      |      |                       |      |      |          |      |      |                       |      |      |
|--------------------------|----------|------|------|-----------------------|------|------|----------|------|------|-----------------------|------|------|
| Log2 LDL-C/HDL-C ratio   |          |      |      |                       |      |      |          |      |      |                       |      |      |
| Time since index date    | Cases    |      |      |                       |      |      | Controls |      |      |                       |      |      |
|                          | Observed |      |      | Predicted             |      |      | Observed |      |      | Predicted             |      |      |
|                          | Number   | Mean | SD   | Time since index date | Mean | SE   | Number   | Mean | SD   | Time since index date | Mean | SE   |
| 0                        | 7        | 1,14 | 0,69 | 0,00                  | 1,20 | 0,15 | 70       | 1,32 | 0,54 | 0,00                  | 1,31 | 0,02 |
| 1                        | 7        | 1,14 | 0,32 | 0,61                  | 1,19 | 0,11 | 111      | 1,25 | 0,61 | 0,61                  | 1,29 | 0,01 |
| 2                        | 15       | 1,38 | 0,50 | 1,22                  | 1,18 | 0,09 | 137      | 1,24 | 0,57 | 1,22                  | 1,28 | 0,01 |
| 3                        | 21       | 1,00 | 0,65 | 1,84                  | 1,17 | 0,07 | 155      | 1,27 | 0,56 | 1,84                  | 1,26 | 0,01 |
| 4                        | 14       | 1,30 | 0,67 | 2,45                  | 1,16 | 0,06 | 226      | 1,25 | 0,58 | 2,45                  | 1,24 | 0,01 |
| 5                        | 37       | 1,15 | 0,69 | 3,06                  | 1,16 | 0,06 | 369      | 1,19 | 0,57 | 3,06                  | 1,23 | 0,01 |
| 6                        | 51       | 1,14 | 0,55 | 3,67                  | 1,15 | 0,06 | 536      | 1,14 | 0,57 | 3,67                  | 1,22 | 0,01 |
| 7                        | 63       | 1,11 | 0,63 | 4,29                  | 1,14 | 0,05 | 654      | 1,12 | 0,61 | 4,29                  | 1,20 | 0,01 |
| 8                        | 59       | 1,00 | 0,69 | 4,90                  | 1,14 | 0,05 | 743      | 1,14 | 0,59 | 4,90                  | 1,19 | 0,01 |
| 9                        | 60       | 1,06 | 0,62 | 5,51                  | 1,13 | 0,04 | 757      | 1,13 | 0,66 | 5,51                  | 1,18 | 0,01 |
| 10                       | 76       | 1,16 | 0,58 | 6,12                  | 1,13 | 0,04 | 872      | 1,11 | 0,62 | 6,12                  | 1,17 | 0,01 |
| 11                       | 86       | 1,16 | 0,58 | 6,73                  | 1,13 | 0,04 | 972      | 1,10 | 0,62 | 6,73                  | 1,16 | 0,01 |
| 12                       | 119      | 1,12 | 0,64 | 7,35                  | 1,12 | 0,03 | 1007     | 1,09 | 0,59 | 7,35                  | 1,15 | 0,01 |
| 13                       | 90       | 1,03 | 0,58 | 7,96                  | 1,12 | 0,03 | 1142     | 1,07 | 0,62 | 7,96                  | 1,14 | 0,01 |
| 14                       | 110      | 1,07 | 0,60 | 8,57                  | 1,12 | 0,03 | 1165     | 1,07 | 0,63 | 8,57                  | 1,13 | 0,01 |
| 15                       | 119      | 1,21 | 0,58 | 9,18                  | 1,12 | 0,02 | 1208     | 1,07 | 0,62 | 9,18                  | 1,12 | 0,01 |
| 16                       | 125      | 1,00 | 0,59 | 9,80                  | 1,12 | 0,02 | 1346     | 1,07 | 0,62 | 9,80                  | 1,11 | 0,01 |
| 17                       | 145      | 1,17 | 0,59 | 10,41                 | 1,12 | 0,02 | 1336     | 1,06 | 0,61 | 10,41                 | 1,11 | 0,01 |
| 18                       | 145      | 1,09 | 0,60 | 11,02                 | 1,12 | 0,02 | 1401     | 1,05 | 0,59 | 11,02                 | 1,10 | 0,00 |
| 19                       | 142      | 1,06 | 0,60 | 11,63                 | 1,12 | 0,02 | 1453     | 1,05 | 0,61 | 11,63                 | 1,10 | 0,00 |
| 20                       | 130      | 1,13 | 0,67 | 12,24                 | 1,12 | 0,02 | 1473     | 1,03 | 0,61 | 12,24                 | 1,09 | 0,00 |
| 21                       | 162      | 1,07 | 0,66 | 12,86                 | 1,12 | 0,02 | 1415     | 1,02 | 0,62 | 12,86                 | 1,09 | 0,00 |
| 22                       | 157      | 1,04 | 0,61 | 13,47                 | 1,12 | 0,03 | 1365     | 1,03 | 0,61 | 13,47                 | 1,08 | 0,00 |
| 23                       | 151      | 0,94 | 0,57 | 14,08                 | 1,12 | 0,03 | 1385     | 0,99 | 0,64 | 14,08                 | 1,08 | 0,00 |
| 24                       | 132      | 0,83 | 0,54 | 14,69                 | 1,11 | 0,03 | 1205     | 0,98 | 0,65 | 14,69                 | 1,07 | 0,00 |
| 25                       | 107      | 0,89 | 0,59 | 15,31                 | 1,11 | 0,03 | 1020     | 0,96 | 0,62 | 15,31                 | 1,07 | 0,00 |
| 26                       | 96       | 0,82 | 0,52 | 15,92                 | 1,10 | 0,03 | 810      | 0,95 | 0,61 | 15,92                 | 1,06 | 0,00 |
| 27                       | 57       | 0,87 | 0,53 | 16,53                 | 1,10 | 0,03 | 675      | 0,91 | 0,63 | 16,53                 | 1,06 | 0,00 |
| 28                       | 70       | 0,83 | 0,52 | 17,14                 | 1,09 | 0,02 | 547      | 0,91 | 0,62 | 17,14                 | 1,06 | 0,00 |
| 29                       | 45       | 0,89 | 0,58 | 17,76                 | 1,08 | 0,02 | 452      | 0,91 | 0,58 | 17,76                 | 1,05 | 0,00 |
| 30                       | 25       | 0,82 | 0,58 | 18,37                 | 1,07 | 0,02 | 308      | 0,85 | 0,60 | 18,37                 | 1,05 | 0,00 |
|                          |          |      |      | 18,98                 | 1,06 | 0,02 |          |      |      | 18,98                 | 1,04 | 0,00 |
|                          |          |      |      | 19,59                 | 1,05 | 0,02 |          |      |      | 19,59                 | 1,04 | 0,00 |
|                          |          |      |      | 20,20                 | 1,03 | 0,02 |          |      |      | 20,20                 | 1,03 | 0,00 |
|                          |          |      |      | 20,82                 | 1,02 | 0,02 |          |      |      | 20,82                 | 1,02 | 0,00 |
|                          |          |      |      | 21,43                 | 1,00 | 0,02 |          |      |      | 21,43                 | 1,02 | 0,00 |
|                          |          |      |      | 22,04                 | 0,99 | 0,02 |          |      |      | 22,04                 | 1,01 | 0,00 |
|                          |          |      |      | 22,65                 | 0,97 | 0,02 |          |      |      | 22,65                 | 1,00 | 0,00 |
|                          |          |      |      | 23,27                 | 0,95 | 0,02 |          |      |      | 23,27                 | 0,99 | 0,00 |
|                          |          |      |      | 23,88                 | 0,93 | 0,02 |          |      |      | 23,88                 | 0,98 | 0,00 |
|                          |          |      |      | 24,49                 | 0,92 | 0,02 |          |      |      | 24,49                 | 0,97 | 0,00 |
|                          |          |      |      | 25,10                 | 0,90 | 0,02 |          |      |      | 25,10                 | 0,96 | 0,00 |
|                          |          |      |      | 25,71                 | 0,88 | 0,02 |          |      |      | 25,71                 | 0,95 | 0,00 |
|                          |          |      |      | 26,33                 | 0,87 | 0,02 |          |      |      | 26,33                 | 0,94 | 0,00 |
|                          |          |      |      | 26,94                 | 0,85 | 0,02 |          |      |      | 26,94                 | 0,93 | 0,00 |
|                          |          |      |      | 27,55                 | 0,84 | 0,02 |          |      |      | 27,55                 | 0,92 | 0,01 |
|                          |          |      |      | 28,16                 | 0,84 | 0,02 |          |      |      | 28,16                 | 0,90 | 0,01 |
|                          |          |      |      | 28,78                 | 0,83 | 0,02 |          |      |      | 28,78                 | 0,89 | 0,01 |
|                          |          |      |      | 29,39                 | 0,83 | 0,03 |          |      |      | 29,39                 | 0,88 | 0,01 |
|                          |          |      |      | 30,00                 | 0,84 | 0,03 |          |      |      | 30,00                 | 0,86 | 0,01 |

| Stress-related disorders |          |       |      |                       |       |      |          |       |      |                       |       |      |
|--------------------------|----------|-------|------|-----------------------|-------|------|----------|-------|------|-----------------------|-------|------|
| Log2 ApoB/ApoA-I ratio   |          |       |      |                       |       |      |          |       |      |                       |       |      |
| Time since index date    | Cases    |       |      |                       |       |      | Controls |       |      |                       |       |      |
|                          | Observed |       |      | Predicted             |       |      | Observed |       |      | Predicted             |       |      |
|                          | Number   | Mean  | SD   | Time since index date | Mean  | SE   | Number   | Mean  | SD   | Time since index date | Mean  | SE   |
| 0                        | 11       | -0,47 | 0,00 | 0,00                  | -0,36 | 0,19 | 212      | -0,34 | 0,35 | 0,00                  | -0,27 | 0,03 |
| 1                        | 18       | -0,43 | 0,22 | 0,61                  | -0,35 | 0,14 | 389      | -0,28 | 0,43 | 0,61                  | -0,28 | 0,03 |
| 2                        | 20       | 0,01  | 0,16 | 1,22                  | -0,35 | 0,11 | 374      | -0,25 | 0,49 | 1,22                  | -0,28 | 0,02 |
| 3                        | 39       | -0,43 | 0,49 | 1,84                  | -0,35 | 0,09 | 421      | -0,18 | 0,47 | 1,84                  | -0,29 | 0,02 |
| 4                        | 16       | -0,38 | 0,16 | 2,45                  | -0,35 | 0,08 | 471      | -0,32 | 0,47 | 2,45                  | -0,30 | 0,02 |
| 5                        | 89       | -0,26 | 0,35 | 3,06                  | -0,35 | 0,07 | 781      | -0,33 | 0,45 | 3,06                  | -0,30 | 0,02 |
| 6                        | 90       | -0,34 | 0,39 | 3,67                  | -0,36 | 0,07 | 877      | -0,36 | 0,48 | 3,67                  | -0,31 | 0,02 |
| 7                        | 121      | -0,36 | 0,41 | 4,29                  | -0,36 | 0,06 | 1096     | -0,41 | 0,46 | 4,29                  | -0,32 | 0,02 |
| 8                        | 83       | -0,41 | 0,50 | 4,90                  | -0,36 | 0,06 | 1313     | -0,33 | 0,51 | 4,90                  | -0,32 | 0,02 |
| 9                        | 116      | -0,64 | 0,38 | 5,51                  | -0,36 | 0,06 | 1468     | -0,40 | 0,53 | 5,51                  | -0,33 | 0,02 |
| 10                       | 124      | -0,38 | 0,39 | 6,12                  | -0,36 | 0,05 | 1580     | -0,37 | 0,51 | 6,12                  | -0,34 | 0,02 |
| 11                       | 97       | -0,40 | 0,53 | 6,73                  | -0,37 | 0,05 | 1952     | -0,36 | 0,50 | 6,73                  | -0,34 | 0,01 |
| 12                       | 117      | -0,32 | 0,41 | 7,35                  | -0,37 | 0,04 | 1830     | -0,43 | 0,48 | 7,35                  | -0,35 | 0,01 |
| 13                       | 110      | -0,36 | 0,46 | 7,96                  | -0,37 | 0,04 | 2039     | -0,43 | 0,50 | 7,96                  | -0,35 | 0,01 |
| 14                       | 195      | -0,39 | 0,46 | 8,57                  | -0,37 | 0,04 | 2109     | -0,37 | 0,51 | 8,57                  | -0,36 | 0,01 |
| 15                       | 231      | -0,43 | 0,48 | 9,18                  | -0,37 | 0,03 | 2229     | -0,36 | 0,52 | 9,18                  | -0,36 | 0,01 |
| 16                       | 227      | -0,40 | 0,44 | 9,80                  | -0,37 | 0,03 | 2348     | -0,36 | 0,49 | 9,80                  | -0,37 | 0,01 |
| 17                       | 246      | -0,25 | 0,51 | 10,41                 | -0,37 | 0,03 | 2377     | -0,37 | 0,49 | 10,41                 | -0,37 | 0,01 |
| 18                       | 259      | -0,30 | 0,61 | 11,02                 | -0,37 | 0,03 | 2442     | -0,40 | 0,51 | 11,02                 | -0,38 | 0,01 |
| 19                       | 219      | -0,47 | 0,55 | 11,63                 | -0,37 | 0,03 | 2628     | -0,42 | 0,47 | 11,63                 | -0,38 | 0,01 |
| 20                       | 234      | -0,46 | 0,61 | 12,24                 | -0,37 | 0,03 | 2737     | -0,42 | 0,48 | 12,24                 | -0,38 | 0,01 |
| 21                       | 304      | -0,48 | 0,63 | 12,86                 | -0,37 | 0,03 | 2239     | -0,45 | 0,46 | 12,86                 | -0,39 | 0,01 |
| 22                       | 227      | -0,43 | 0,47 | 13,47                 | -0,37 | 0,03 | 2335     | -0,39 | 0,51 | 13,47                 | -0,39 | 0,01 |
| 23                       | 166      | -0,55 | 0,45 | 14,08                 | -0,38 | 0,03 | 2236     | -0,39 | 0,54 | 14,08                 | -0,39 | 0,01 |
| 24                       | 223      | -0,54 | 0,41 | 14,69                 | -0,38 | 0,03 | 1992     | -0,44 | 0,50 | 14,69                 | -0,39 | 0,01 |
| 25                       | 202      | -0,41 | 0,51 | 15,31                 | -0,38 | 0,03 | 1625     | -0,44 | 0,49 | 15,31                 | -0,40 | 0,01 |
| 26                       | 155      | -0,54 | 0,27 | 15,92                 | -0,39 | 0,03 | 1305     | -0,41 | 0,47 | 15,92                 | -0,40 | 0,01 |
| 27                       | 76       | -0,55 | 0,47 | 16,53                 | -0,39 | 0,03 | 913      | -0,43 | 0,51 | 16,53                 | -0,40 | 0,01 |
| 28                       | 58       | -0,49 | 0,32 | 17,14                 | -0,40 | 0,03 | 728      | -0,37 | 0,46 | 17,14                 | -0,40 | 0,01 |
| 29                       | 47       | -0,61 | 0,23 | 17,76                 | -0,41 | 0,02 | 495      | -0,32 | 0,41 | 17,76                 | -0,41 | 0,01 |
| 30                       | 30       | -0,19 | 0,31 | 18,37                 | -0,42 | 0,02 | 421      | -0,33 | 0,39 | 18,37                 | -0,41 | 0,01 |
|                          |          |       |      | 18,98                 | -0,43 | 0,02 |          |       |      | 18,98                 | -0,41 | 0,01 |
|                          |          |       |      | 19,59                 | -0,44 | 0,02 |          |       |      | 19,59                 | -0,41 | 0,01 |
|                          |          |       |      | 20,20                 | -0,45 | 0,02 |          |       |      | 20,20                 | -0,42 | 0,01 |
|                          |          |       |      | 20,82                 | -0,46 | 0,02 |          |       |      | 20,82                 | -0,42 | 0,01 |
|                          |          |       |      | 21,43                 | -0,47 | 0,02 |          |       |      | 21,43                 | -0,42 | 0,01 |
|                          |          |       |      | 22,04                 | -0,48 | 0,02 |          |       |      | 22,04                 | -0,42 | 0,01 |
|                          |          |       |      | 22,65                 | -0,50 | 0,02 |          |       |      | 22,65                 | -0,42 | 0,01 |
|                          |          |       |      | 23,27                 | -0,51 | 0,02 |          |       |      | 23,27                 | -0,42 | 0,01 |
|                          |          |       |      | 23,88                 | -0,51 | 0,03 |          |       |      | 23,88                 | -0,42 | 0,01 |
|                          |          |       |      | 24,49                 | -0,52 | 0,03 |          |       |      | 24,49                 | -0,42 | 0,01 |
|                          |          |       |      | 25,10                 | -0,52 | 0,03 |          |       |      | 25,10                 | -0,42 | 0,01 |
|                          |          |       |      | 25,71                 | -0,52 | 0,03 |          |       |      | 25,71                 | -0,41 | 0,01 |
|                          |          |       |      | 26,33                 | -0,52 | 0,03 |          |       |      | 26,33                 | -0,41 | 0,01 |
|                          |          |       |      | 26,94                 | -0,51 | 0,03 |          |       |      | 26,94                 | -0,40 | 0,01 |
|                          |          |       |      | 27,55                 | -0,49 | 0,03 |          |       |      | 27,55                 | -0,39 | 0,01 |
|                          |          |       |      | 28,16                 | -0,47 | 0,04 |          |       |      | 28,16                 | -0,37 | 0,01 |
|                          |          |       |      | 28,78                 | -0,44 | 0,04 |          |       |      | 28,78                 | -0,36 | 0,01 |
|                          |          |       |      | 29,39                 | -0,40 | 0,05 |          |       |      | 29,39                 | -0,34 | 0,01 |
|                          |          |       |      | 30,00                 | -0,34 | 0,07 |          |       |      | 30,00                 | -0,32 | 0,02 |

**eFigure 1.** Flowchart of the Study Design

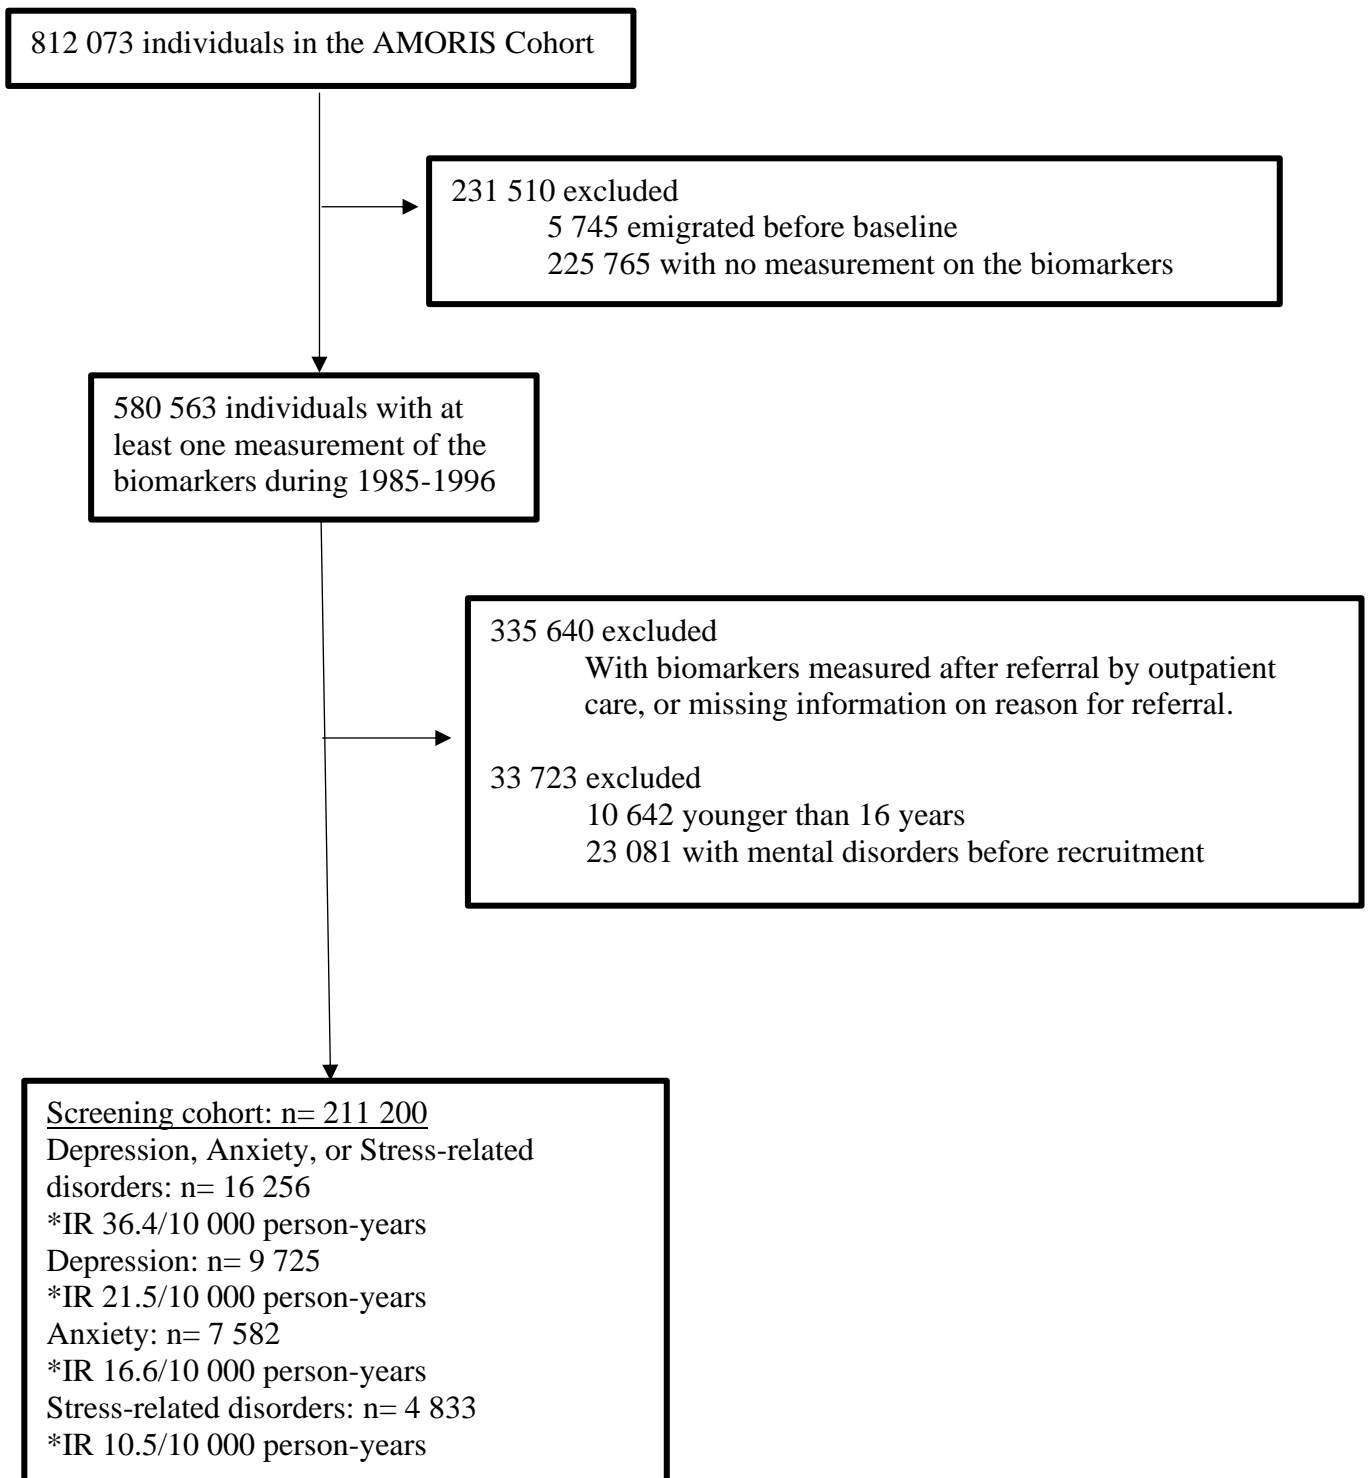

**eFigure 2.** Mean Concentrations of Blood Biomarkers of Lipid, Carbohydrate, and Apolipoprotein Metabolism During the 30 Years Before the Diagnosis of Depression, Anxiety, or Stress-Related Disorders, Comparing Patients With Such Disorders (Green Area) to the Matched Controls (Pink Area)

The method of local polynomial smoothing with 4th-degree polynomial function and Gaussian kernel function was used to plot the mean concentrations of the biomarkers over time before the index date with 95% CI. TC: total cholesterol; TG: triglycerides; LDL-C: low-density lipoprotein cholesterol; HDL-C: high-density lipoprotein cholesterol; ApoA-I: apolipoprotein A-I; ApoB: apolipoprotein B

# Depression, Anxiety, Stress-related disorders

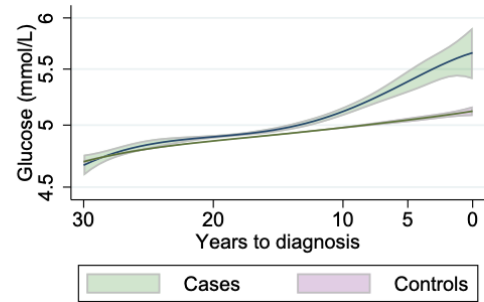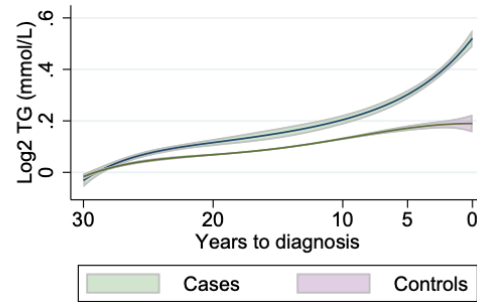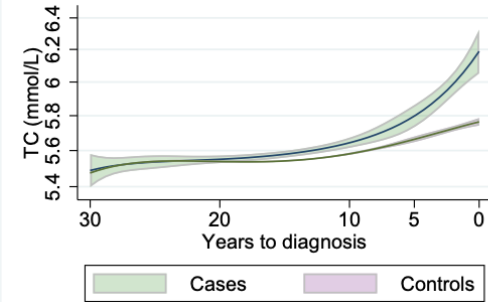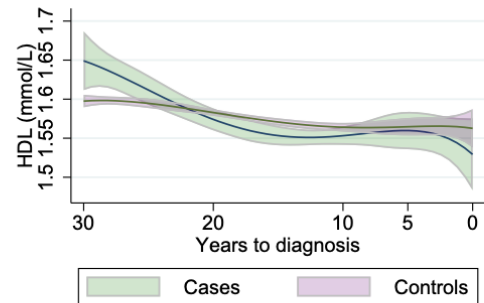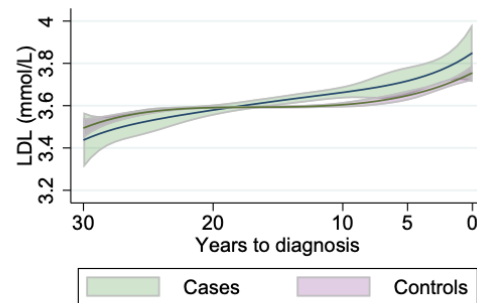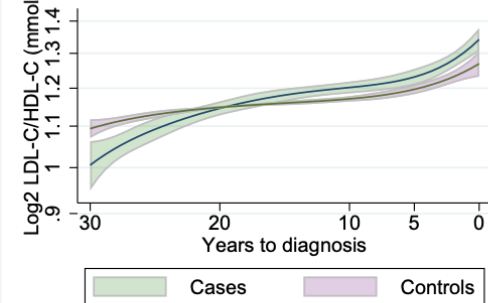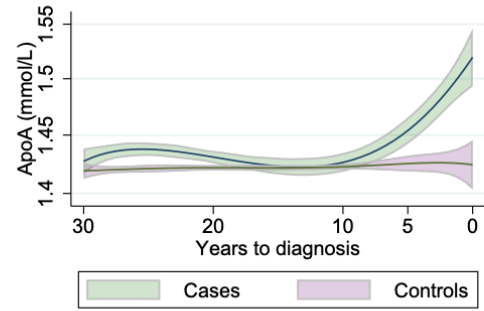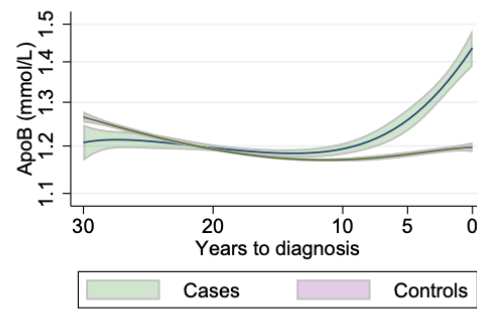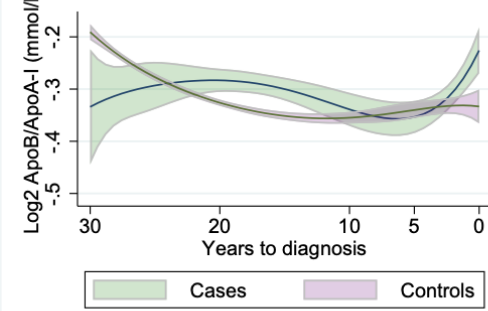



# Depression

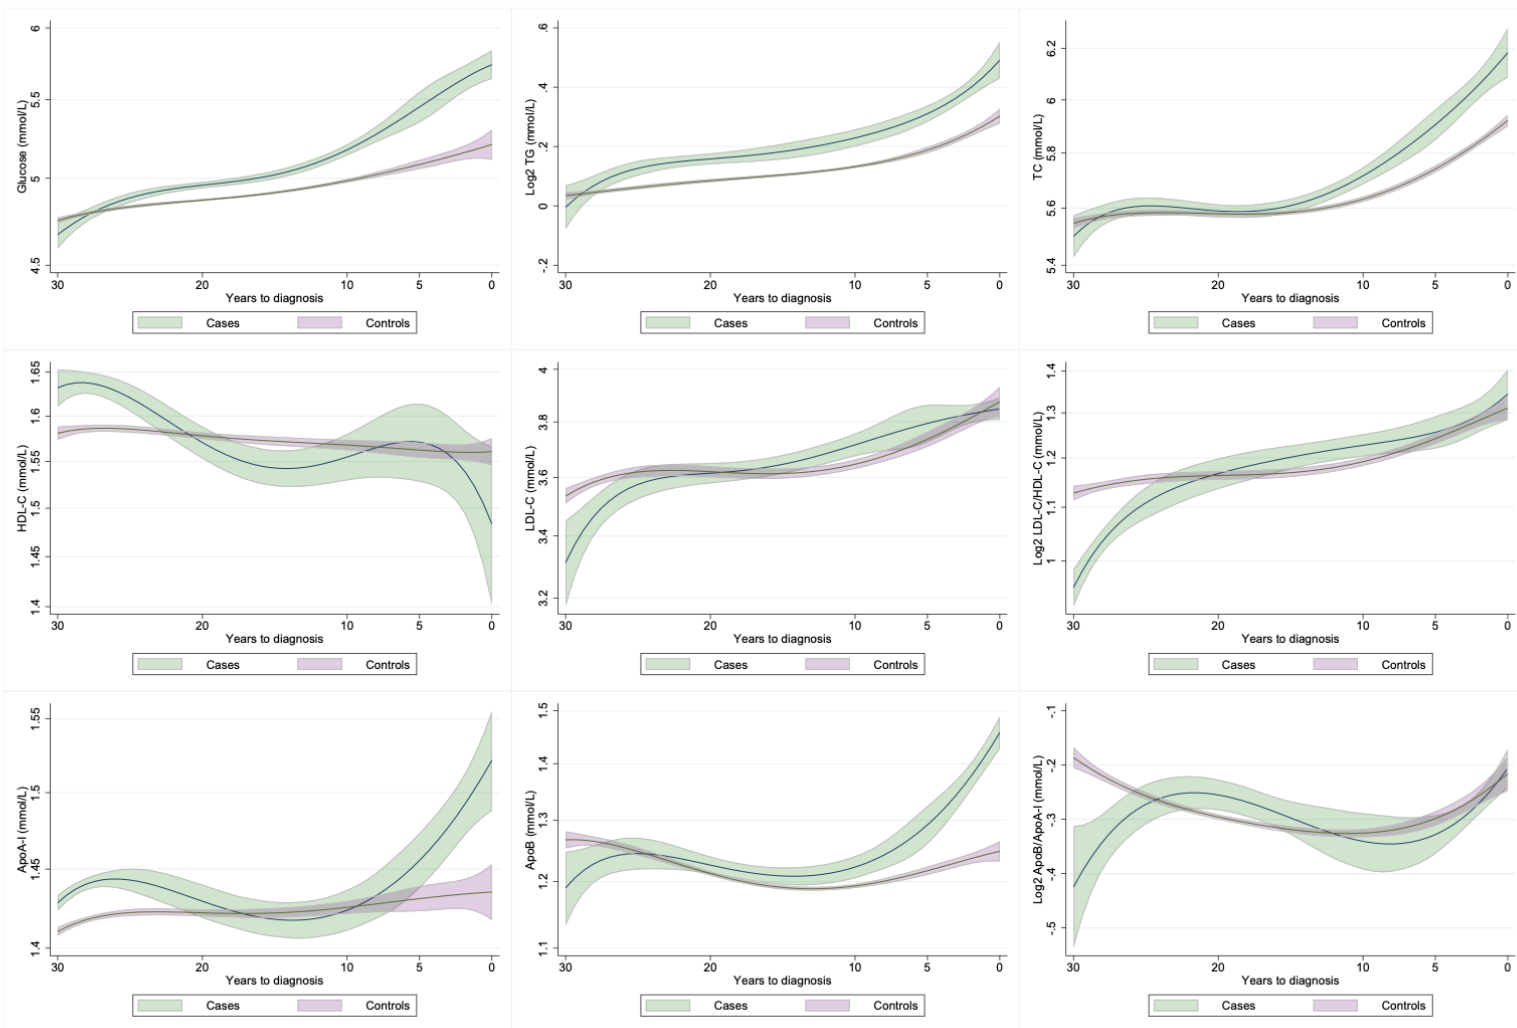

# Anxiety

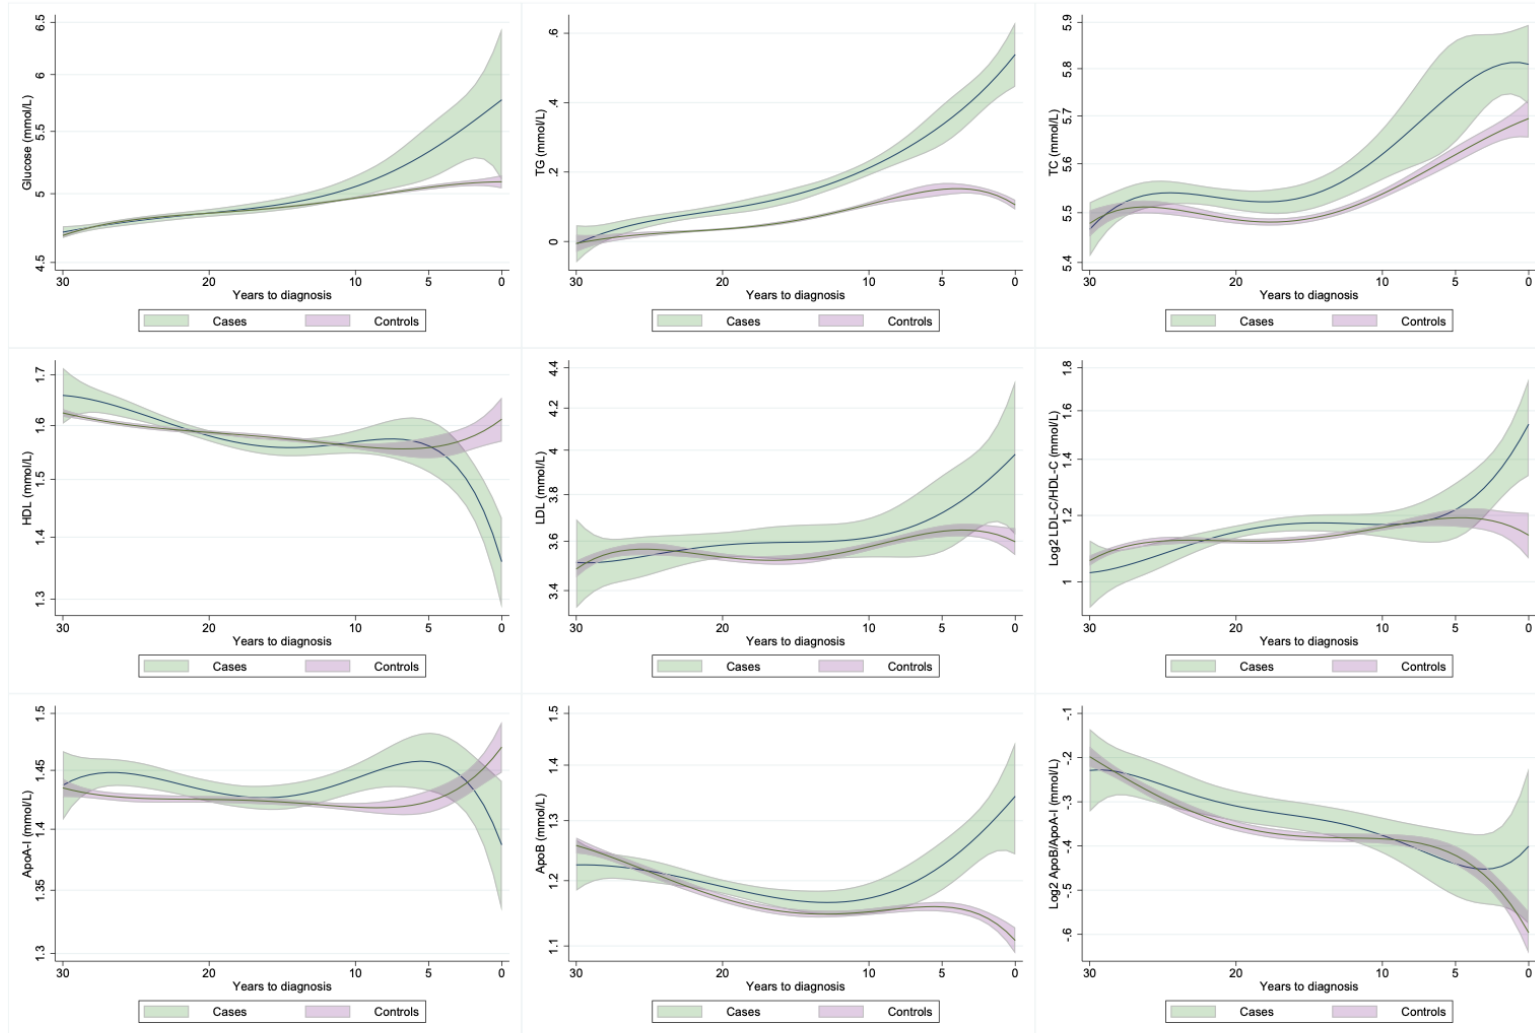

# Stress-related Disorders

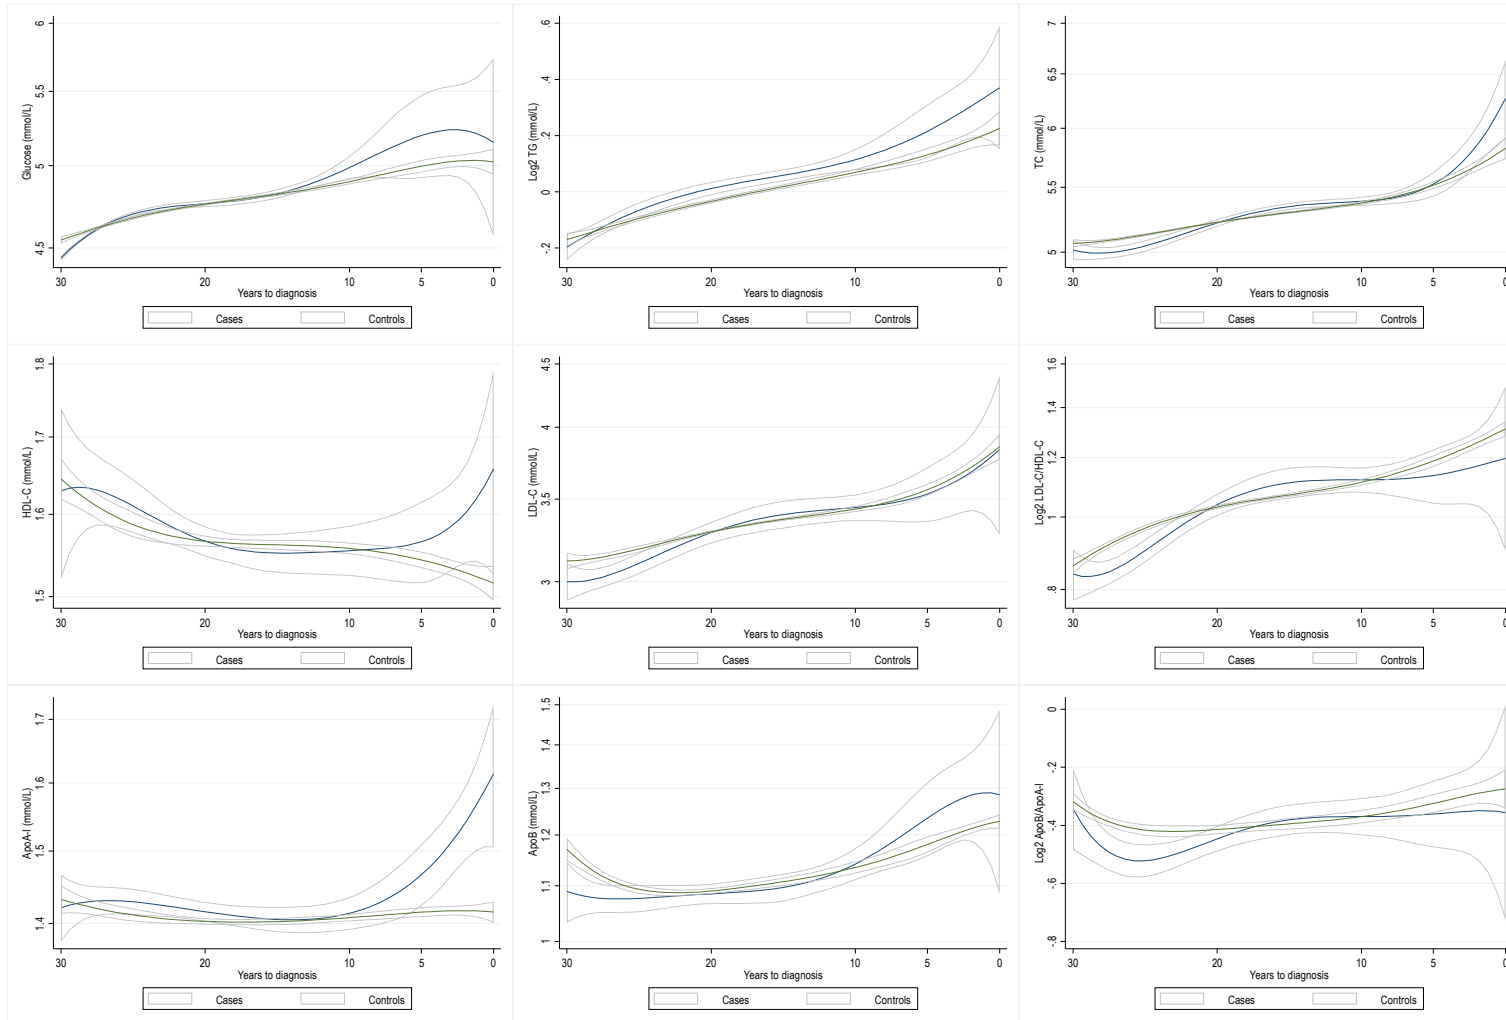

Supplement: jamanetwopen-e244525-s001.pdf [file jamanetwopen-e244525-s001.pdf]
