# Supplementary material for: Metabolic Profile and Long-Term Risk of Depression, Anxiety, and Stress-Related Disorders
Source: PubMed Central journal article supplement (PMC10988352; doi:10.1001/jamanetworkopen.2024.4525), 2024-04-02
Supplement: jamanetwopen-e244525-s002.pdf [file jamanetwopen-e244525-s002.pdf]

## Data Sharing Statement

Chourpiliadis. Metabolic Profile and Long-Term Risk of Depression, Anxiety, and Stress-Related Disorders. *JAMA Netw Open*. Published April 02, 2024.

doi:10.1001/jamanetworkopen.2024.4525

### Data

**Data available:** No
